# Supplementary material for: Predictors of pain reduction following manual therapy in patients with temporomandibular disorders: a protocol for a prospective observational study
Source: PubMed Central journal article supplement — BMJ Open. 2019 Nov 12;9(11):e032113. doi: 10.1136/bmjopen-2019-032113 (PMC6858120; doi:10.1136/bmjopen-2019-032113), 2019-11-12
Supplement: bmjopen-2019-032113.draft_revisions.pdf [file bmjopen-2019-032113.draft_revisions.pdf]

# BMJ Open

BMJ Open is committed to open peer review. As part of this commitment we make the peer review history of every article we publish publicly available.

When an article is published we post the peer reviewers' comments and the authors' responses online. We also post the versions of the paper that were used during peer review. These are the versions that the peer review comments apply to.

The versions of the paper that follow are the versions that were submitted during the peer review process. They are not the versions of record or the final published versions. They should not be cited or distributed as the published version of this manuscript.

BMJ Open is an open access journal and the full, final, typeset and author-corrected version of record of the manuscript is available on our site with no access controls, subscription charges or pay-per-view fees (<http://bmjopen.bmj.com>).

If you have any questions on BMJ Open's open peer review process please email [info.bmjopen@bmj.com](mailto:info.bmjopen@bmj.com)

# BMJ Open

**PREDICTORS OF PAIN REDUCTION FOLLOWING MANUAL  
THERAPY IN PATIENTS WITH TEMPOROMANDIBULAR  
DISORDERS:  
A PROTOCOL FOR A PROSPECTIVE OBSERVATIONAL STUDY**

|                               |                                                                                                                                                                                                                                                                                                                                                                                                                                                                                                                                                                                                                         |
|-------------------------------|-------------------------------------------------------------------------------------------------------------------------------------------------------------------------------------------------------------------------------------------------------------------------------------------------------------------------------------------------------------------------------------------------------------------------------------------------------------------------------------------------------------------------------------------------------------------------------------------------------------------------|
| Journal:                      | <i>BMJ Open</i>                                                                                                                                                                                                                                                                                                                                                                                                                                                                                                                                                                                                         |
| Manuscript ID                 | bmjopen-2019-032113                                                                                                                                                                                                                                                                                                                                                                                                                                                                                                                                                                                                     |
| Article Type:                 | Protocol                                                                                                                                                                                                                                                                                                                                                                                                                                                                                                                                                                                                                |
| Date Submitted by the Author: | 03-Jun-2019                                                                                                                                                                                                                                                                                                                                                                                                                                                                                                                                                                                                             |
| Complete List of Authors:     | Asquini, Giacomo; University of Birmingham, School of Sport, Exercise and Rehabilitation Sciences<br>Edoardo Bianchi , Andrea ; Italian Stomatologic Institute<br>Heneghan, Nicola; University of Birmingham, School of Sport, Exercise and Rehabilitation Sciences<br>Rushton, Alison; niversity of Birmingham, School of Health and Population Sciences, College of Medical and Dental Sciences<br>Borromeo, Giulia; Italian Stomatologic Institute<br>Locatelli , Matteo; IRCCS San Raffaele Scientific Institute<br>Falla, Deborah; University of Birmingham, School of Sport, Exercise and Rehabilitation Sciences |
| Keywords:                     | Temporomandibular Disorders, Temporomandibular Joint Dysfunction Syndrome, Pain, Prediction, Manual Therapy                                                                                                                                                                                                                                                                                                                                                                                                                                                                                                             |
|                               |                                                                                                                                                                                                                                                                                                                                                                                                                                                                                                                                                                                                                         |

SCHOLARONE™  
Manuscripts

1  
2  
3  
4  
5  
6  
7  
8  
9  
10  
11  
12  
13  
14  
15  
16  
17  
18  
19  
20  
21  
22  
23  
24  
25  
26  
27  
28  
29  
30  
31  
32  
33  
34  
35  
36  
37  
38  
39  
40  
41  
42  
43  
44  
45  
46  
47  
48  
49  
50  
51  
52  
53  
54  
55  
56  
57  
58  
59  
60

1  
2  
3  
4  
5  
6  
7  
8  
9  
10  
11  
12  
13  
14  
15  
16  
17  
18  
19  
20  
21  
22  
23  
24  
25  
26  
27  
28  
29  
30  
31  
32  
33  
34  
35  
36  
37  
38  
39  
40  
41  
42  
43  
44  
45  
46  
47  
48  
49  
50  
51  
52  
53  
54  
55  
56  
57  
58  
59  
60

**PREDICTORS OF PAIN REDUCTION FOLLOWING MANUAL THERAPY IN  
PATIENTS WITH TEMPOROMANDIBULAR DISORDERS:  
A PROTOCOL FOR A PROSPECTIVE OBSERVATIONAL STUDY**

Asquini G<sup>1,2</sup>, Bianchi AE<sup>2</sup>, Heneghan NR<sup>1</sup>, Rushton A<sup>1</sup>, Borromeo G<sup>2</sup>, Locatelli M<sup>3</sup>, Falla D<sup>1</sup>

**Affiliations**

<sup>1</sup> Centre of Precision Rehabilitation for Spinal Pain (CPR Spine)  
School of Sport, Exercise and Rehabilitation Sciences  
College of Life and Environmental Sciences  
University of Birmingham  
Birmingham B15 2TT  
United Kingdom

<sup>2</sup> Italian Stomatologic Institute  
Cranio-mandibular Physiotherapy Service  
Via Pace 21, 20122 Milan  
Italy

<sup>3</sup> IRCCS San Raffaele Scientific Institute  
Via Olgettina Milano 60,  
20132 Milano,  
Italy

**Corresponding author:**

Deborah Falla

Centre of Precision Rehabilitation for Spinal Pain (CPR Spine)

School of Sport, Exercise and Rehabilitation Sciences

College of Life and Environmental Sciences

University of Birmingham

Birmingham, UK

E-mail: [d.falla@bham.ac.uk](mailto:d.falla@bham.ac.uk)

1  
2  
3 **44 ABSTRACT**  
4

5 **45 Introduction**  
6

7  
8 46 Temporomandibular Disorders (TMD) are principally characterised by pain in the  
9  
10 47 craniomandibular area and probable limitations of jaw opening. Manual therapy, like other  
11  
12 48 recommended conservative treatments included in clinical guidelines, is commonly used to  
13  
14 49 treat patients with TMD to reduce pain and improve function. However, outcomes may be  
15  
16 50 variable. In this study we will use a unique combination of patient-reported outcome  
17  
18 51 measures and clinical tests to identify predictors associated with pain reduction in patients  
19  
20 52 with TMD following manual therapy. Such knowledge will support a more personalised  
21  
22 53 management approach by facilitating clinical decision-making.  
23  
24

25  
26 **54 Methods/analysis**  
27

28 55 An observational prospective design will recruit a cohort of 100 adults with a diagnosis of  
29  
30 56 TMD (according to Axis I of the Diagnostic Criteria for TMD) at a Dental Hospital in Italy.  
31  
32 57 Patients will be treated with four weekly sessions of manual  
33  
34 58 therapy applied to craniomandibular structures. An array of  
35  
36 59 predictors has been chosen based on previous research on  
37  
38 60 prognostic factors for TMD and altered pain modulation in  
39  
40 61 musculoskeletal disorders. Candidate predictors including  
41  
42 62 demographic variables, general health variables, psychosocial  
43  
44 63 features, TMD characteristics, and clinical tests of the  
45  
46 64 temporomandibular joint and masticatory muscles will be  
47  
48 65 collected at baseline. Definition of good outcome is a clinically  
49  
50 66 significant reduction of pain intensity over the last week ( $\geq 30\%$   
51  
52 67 reduction Visual Analogue Scale) immediately following the 4-  
53  
54  
55  
56  
57  
58  
59  
60

1  
2  
3 68 week intervention. Exploratory factor analysis will be applied to  
4  
5  
6 69 analyse factor loading of candidate predictors for good outcome at  
7  
8  
9 70 4 weeks. Subsequently, a logistic multivariable regression model  
10  
11 71 will be performed to calculate low and high risk of good outcome.

## 12 13 72 **Ethics and dissemination**

14  
15  
16 73 Ethical approval will be obtained from the “Fondazione IRCCS Ca’ Granda Ospedale  
17  
18 74 Maggiore Policlinico” and University of Birmingham Ethics Committee. The results will be  
19  
20  
21 75 submitted for publication in a peer-reviewed journal and presented at conferences.

22  
23  
24 76 Keywords: Temporomandibular Disorders, Temporomandibular Joint Dysfunction  
25 77 Syndrome, Pain, Prediction, Manual Therapy

26 78  
27 79 Word count: 3322 [excluding references]  
28  
29

30  
31  
32 80

## 33 81 **STRENGTHS AND LIMITATIONS OF THIS STUDY**

- 34  
35 82     ▪ This will be the first study to identify predictors associated with pain reduction  
36  
37  
38 83     following manual therapy interventions in patients with TMD  
39  
40 84     ▪ The study will utilise a comprehensive array of candidate factors to predict clinically  
41  
42  
43 85     relevant pain reduction  
44  
45 86     ▪ The implications from this study will facilitate clinical decision-making for manual  
46  
47 87     therapists managing patients with TMD  
48  
49 88     ▪ Alternative or additional predictors could be valuable to include but the candidate  
50  
51 89     predictors have been prioritised as they are reliable and valid measures which have a  
52  
53 90     relationship with pain  
54  
55 91     ▪ The study could potentially generate a non-representative sample of patients as it will  
56  
57 92     exclude people who have already received recent treatment for their TMD  
58  
59  
60

1  
2  
3 93  
4  
5 94  
6  
7  
8 95  
9  
10 96  
11  
12 97  
13  
14 98  
15  
16  
17 99  
18  
19 100  
20  
21 101  
22  
23 102  
24  
25 103  
26  
27 104  
28  
29  
30 105  
31  
32 106  
33  
34 107  
35  
36 108  
37  
38 109  
39  
40 110  
41  
42 111  
43  
44 112  
45  
46 113  
47  
48 114  
49  
50 115  
51  
52 116  
53  
54 117  
55  
56  
57  
58  
59  
60

## INTRODUCTION

Temporomandibular Disorders (TMD) affect approximately 10% of the adult population and, in the USA alone, are estimated to cost US\$4 billion per year on management (Lipton et al. 1993; NIDCR, 2014). TMD are principally characterised by pain and limitations of jaw opening (de Leeuw & Klasser, 2013) but many patients also complain of neck and back pain or pain at other sites (Plesh et al. 2011).

Physical therapy is one of the most common conservative interventions for the management of TMD (Calixtre et al., 2016) and given that the aetiology may be unclear (Slade et al., 2016), several therapeutic approaches have been described (Coskun Benlidayi et al., 2016). One approach is manual therapy applied to the craniomandibular structures with evidence suggesting a significant reduction in pain with manual therapy treatment (Armijo-Olivo et al., 2016), although responses are highly variable (Kalamir et al., 2013). In other musculoskeletal pain disorders, such as neck or back pain, pain reduction from manual therapy has been shown to be superior to other treatments (e.g. therapeutic exercise) when targeted towards patients with specific clinical features including the onset of symptoms within 30 days (Flynn et al., 2002; Cleland et al., 2007). Nevertheless, in TMD, no previous study has investigated patient factors associated with significant pain reduction following manual therapy. Such knowledge could be achieved by identifying potential predictors (e.g. pain characteristics, psychosocial features, TMD characteristics) of pain reduction following

1  
2  
3 118 manual therapy interventions in patients with TMD to support a more personalised  
4  
5 119 management approach.

6  
7  
8 120 Very few studies have examined factors associated with pain reduction in patients  
9  
10 121 with TMD. Forssell et al. (2016) conducted a prospective cohort study with 263 primary care  
11  
12 122 patients with TMD pain. They analysed several potential predictors of persistent pain at one-  
13  
14 123 year follow-up including demographic, pain-related and psychosocial variables. It was  
15  
16 124 concluded that patients with TMD who have had numerous previous healthcare visits,  
17  
18 125 complained of high-intensity pain at other body sites and had a greater number of disability  
19  
20 126 days, were at greater risk of having pain one year after the initial assessment. Nevertheless,  
21  
22 127 this study did not examine predictors of pain reduction related to a therapeutic intervention  
23  
24 128 which could be useful to inform clinical practice. Kapos et al. (2018) investigated the  
25  
26 129 association of long-term pain intensity with baseline health-related quality of life and jaw  
27  
28 130 functional limitation in patients with TMD. Findings suggested that baseline health-related  
29  
30 131 quality of life is inversely proportional with pain intensity at an eight-year follow-up  
31  
32 132 regardless of the type of treatment that they received (e.g. surgery, drugs, physical therapy or  
33  
34 133 unconventional therapy). After adjusting for the type of treatments received, by clustering the  
35  
36 134 participants into three groups (medical/conventional management, alternative medicine, and  
37  
38 135 surgical intervention), each predictor analysed (demographic, pain-related and health-related  
39  
40 136 quality of life) maintained similar statistical significance. Notwithstanding, the group  
41  
42 137 classified as “medical/ conventional management” included participants receiving diverse  
43  
44 138 treatments ranging from physical therapy, pharmacology (Acetaminophen, Antidepressants,  
45  
46 139 Anti-inflammatories) to the application of a mouth appliance. This previous work can  
47  
48 140 facilitate clinicians to identify patients who are more challenging to treat by identifying  
49  
50 141 clinical features associated with persistent pain in the long term regardless of the type of  
51  
52  
53  
54  
55  
56  
57  
58  
59  
60

1  
2  
3 142 interventions applied. However, currently no study has examined predictive factors  
4  
5 143 associated with pain reduction following manual therapy interventions in patients with TMD.  
6  
7

8 144 In this study we will use a combination of: (1) demographical variables, (2) general  
9  
10 145 health variables, (3) psychosocial features, (4) TMD characteristics, and (5) clinical tests of  
11  
12 146 the temporomandibular joint and masticatory muscles to identify predictors associated with  
13  
14 147 pain reduction in patients with TMD following manual therapy applied to craniomandibular  
15  
16 148 structures. The knowledge gained from this study will facilitate clinical decision-making for  
17  
18 149 manual therapists managing patients with TMD by providing clinicians with key factors to  
19  
20 150 evaluate, to determine whether or not the patient is likely to have a clinically relevant  
21  
22 151 reduction in their pain immediately following four weekly applications of manual therapy.  
23  
24  
25  
26  
27

## 28 153 **METHODS AND ANALYSIS**

### 30 31 154 **Source of data**

32  
33  
34 155 A prospective observational study will recruit a cohort of patients referred to the  
35  
36 156 Italian Stomatologic Institute with a TMD diagnosis according to the Axis I of the Diagnostic  
37  
38 157 Criteria for TMDs (DC/TMD) (Shiffman et al., 2014). This protocol is written according to  
39  
40 158 the Transparent Reporting of a multivariable prediction model for Individual Prognosis or  
41  
42 159 Diagnosis (TRIPOD) statement (Collins et al., 2015) in which recommendations are provided  
43  
44 160 about prediction model development and validation. Ethical clearance will be obtained from  
45  
46 161 the Ethics Committee of the Fondazione IRCCS Ca' Granda Ospedale Maggiore Policlinico,  
47  
48 162 and the University of Birmingham Ethics Committee, and the study will be conducted in  
49  
50 163 accordance with the Declaration of Helsinki.  
51  
52  
53  
54  
55

56 164 Patient reported and physical assessment data will be collected at baseline prior to  
57  
58 165 commencing treatment. Outcome will be collected at the end of the fourth session of  
59  
60



1  
2  
3 166 craniomandibular manual therapy (at one month). This timeline has been selected based on  
4  
5 167 previous studies investigating 1) the effects of manual therapy on pain (Bishop et al., 2015;  
6  
7 168 Vigotsky et al., 2015); and 2) work confirming the effectiveness of manual therapy for TMD  
8  
9 169 patients (Calixtre et al., 2015) and is believed to be reasonable for the purposes of this study.  
10  
11  
12

### 13 170 **Setting and Participants**

14  
15 171 Participant recruitment will be carried out at the TMJ Unit of the Italian Stomatological  
16  
17 172 Institute (Dental Hospital) in Milan, Italy over a period of up to 12 months (planned start date  
18  
19 173 July 2019). Consecutive eligible participants will be approached for recruitment until the  
20  
21 174 sample size is reached.  
22  
23  
24

#### 25 175 *Eligibility criteria*

26  
27 176 Inclusion criteria: (1) adults aged  $\geq 18$  years; (2) TMD diagnosis  
28  
29 177 according to the Axis I of the Diagnostic Criteria for TMDs (DC/TMD)  
30  
31 178 (Shiffman et al., 2014); (3) no therapeutic interventions reported  
32  
33 179 (for their TMD) in the past six months (Wahlund et al., 2015); (4)  
34  
35 180 capacity to use and understand written and verbal Italian language;  
36  
37 181 (5) mental capacity to provide informed consent.  
38  
39  
40  
41  
42

43 182 Exclusion criteria: (1) TMD pain related to rheumatoid/inflammatory arthritis (2) any  
44  
45 183 physical or mental condition that could potentially influence the study. Additionally, patients  
46  
47 184 will be excluded if (3) they commence another treatment for their TMD (pharmacology, oral  
48  
49 185 appliance, others) throughout the duration of the study.  
50  
51  
52

53 186

### 54 187 **Recruitment**

55  
56  
57 188 Based on feasibility data from the last 5 years of activity at the TMJ Unit of Italian  
58  
59 189 Stomatologic Institute, it is estimated that at least 130 eligible participants will be available  
60

1  
2  
3 190 for recruitment over 13 months. According to previous observational studies on the  
4  
5 191 prediction of outcomes in musculoskeletal disorders, it is estimated that 75% of eligible  
6  
7 192 participants will consent to participation [100 participants] (Flynn et al., 2002; Cleland et al.,  
8  
9 193 2007).

10  
11  
12 194 All patients attending the TMJ Unit will be screened for the presence of a TMD. One  
13  
14 195 expert dentist with >10 years' experience in the management of patients with TMD, will  
15  
16 196 confirm the TMD diagnosis and, in accordance with the inclusion/exclusion criteria, will  
17  
18 197 explain the study to the potential participant and provide the patient information sheet.  
19  
20 198 Participants will then give their written informed consent prior to inclusion in the study.  
21  
22 199 Afterwards, the participant will be referred to see a physiotherapist [independent assessor, >5  
23  
24 200 years' experience in managing patients with TMD] for the baseline assessments (summarised  
25  
26 201 in Table 1) and then treatment will commence within the same week. After the last session  
27  
28 202 (i.e. one month from baseline), the participants will be assessed again by the assessing  
29  
30 203 physiotherapist to measure outcome. Participant flow through the study is outlined in Figure  
31  
32 204 1.  
33  
34  
35  
36  
37  
38  
39

40 [FIGURE 1]  
41  
42  
43

## 44 208 **Treatment**

45  
46 209 Participants will receive four sessions of manual therapy applied to craniomandibular  
47  
48 210 structures over 4 weeks (Crockett et al., 1986; Guarda-Nardini et al., 2012; Nascimento et al.,  
49  
50 211 2013). Two physiotherapists, each with >5 years' experience in manual therapy / TMD will  
51  
52 212 perform the treatments. They will not be involved in participant recruitment, assessment or  
53  
54 213 the collection of the outcome measure. Manual therapy techniques will be based on the  
55  
56 214 clinical examination, and will be selected at the discretion of the treating physiotherapist  
57  
58  
59  
60

1  
2  
3 215 according to their clinical reasoning of the individual case. Overall, the application of manual  
4  
5 216 therapy aims to decrease pain by treating masticatory muscle trigger points, muscle tightness,  
6  
7 217 and restricted temporomandibular joint movements. Several techniques will be considered  
8  
9 218 including: (i) ventral and caudal anterior glide temporomandibular joint mobilization  
10  
11 219 (Cleland et al. 2004); (ii) soft tissue interventions for the management of trigger points in  
12  
13 220 masticatory muscles (Miernik et al. 2012); (iii) myofascial induction therapy [functional  
14  
15 221 restoration of the fascial system] applied to craniomandibular structures (Fernández-de-la-  
16  
17 222 Peñas et al. 2018).

18  
19  
20  
21 223 The structures targeted in the treatment sessions will be the temporomandibular joint,  
22  
23 224 temporal muscles, masseter muscles, medial and lateral pterygoid muscles and suprahyoid  
24  
25 225 muscles, applied at the discretion of the physiotherapist based on the patient's individual  
26  
27 226 presentation. During the treatment sessions, the treating physiotherapists will provide  
28  
29 227 explanations about the patient's condition and answer any participant questions by promoting  
30  
31 228 general advice. The treatment sessions will last from 20 to 30 minutes duration. No other  
32  
33 229 treatment (e.g. oral appliance) will be performed for the management of their TMD. If during  
34  
35 230 the course of the four-week intervention, a patient seeks treatment for an acute episode of  
36  
37 231 pain at another site (e.g. neck pain, low back pain, shoulder pain) they will be withdrawn  
38  
39 232 from the study.  
40  
41  
42  
43  
44  
45  
46

## 47 234 **Outcome**

48  
49 235 The outcome being predicted by the prediction model is pain intensity since patients  
50  
51 236 with TMD typically report pain to be their primary problem (de Leeuw & Klasser, 2013),  
52  
53 237 manual therapy is largely known to be effective principally for pain modulation (Bialosky et  
54  
55 238 al., 2009) and change in pain intensity has most commonly been the primary outcome of  
56  
57  
58  
59  
60

1  
2  
3 239 choice in several other studies of patients with TMD (Kalamir et al., 2010; Gomes et al.,  
4  
5 240 2014; Tuncer et al., 2013; Von Piekartz et al., 2013).

7 241 Pain intensity will be calculated by averaging the ratings of current pain, average pain  
8  
9 242 in the past week, and worst pain in the past week using the Visual Analogue Scale (VAS),  
10  
11 243 consisting of a horizontal line measuring 10 cm (without marks), with “no pain” written at the  
12  
13 244 left extremity, and “worst pain imaginable” at the right extremity (Haefeli et al., 2005). The  
14  
15 245 VAS is a reliable and valid scale to assess pain intensity as an  
16  
17 246 outcome measure in intervention studies (Dworkin et al. 2005).

18  
19 247 Based on the Initiative on Methods, Measurement, and Pain  
20  
21 248 Assessment in Clinical Trials (IMMPACT) recommendations about  
22  
23 249 TMD reviewed by Haythornthwaite (2010), a reduction of at least 30%  
24  
25 250 of the VAS score for pain intensity is considered clinically  
26  
27 251 significant. Consequently, a reduction in the total VAS score [ $\geq$   
28  
29 252 30%] will be defined as a good outcome. The outcome measure will be  
30  
31 253 evaluated by the same independent assessor to minimise detection bias (Higgins et al., 2011).

32  
33 254 To capture a potential change in function which may occur with a change in pain  
34  
35 255 intensity, patients will also complete the patient specific functional scale [PSFS] (Stratford et  
36  
37 256 al. 1995) pre and post treatment. The PSFS is a self-reported outcome measure assessing  
38  
39 257 functional change in patients with musculoskeletal disorders (Horn et al., 2012; Abbott et al.,  
40  
41 258 2014). It is responsive to clinically significant change over time (Maughan et al., 2010).  
42  
43 259 Patients will be invited to rate, on an 11-point scale, their level of difficulty performing at least  
44  
45 260 three different daily activities. Following the treatment, patients will be required to score again  
46  
47 261 the activities previously rated. The PSFS is a valid, reliable, and responsive outcome measure  
48  
49  
50  
51  
52  
53  
54  
55  
56  
57  
58  
59  
60

262 with a high test-retest reliability in different musculoskeletal disorders such as low back and  
 263 neck pain (Hefford et al., 2012; Westaway et al., 1998; Chatman et al., 1997).

264

### 265 **Candidate predictors**

266 The candidate predictors that have been chosen are reliable and valid measures which  
 267 have a relationship with pain. The selection is based on previous research on prognostic factors  
 268 for TMD and altered pain modulation in musculoskeletal disorders (Bair et al., 2016; Clark et  
 269 al., 2017). Candidate predictors are summarised in Table 1, with further detail in  
 270 Supplementary file S1. All data collection will be standardised through protocols and clinical  
 271 report forms.

272

273

274

275 **Table 1: Summary of candidate predictors.**

276

| <b>Domain / Candidate predictor</b>                   | <b>Measure / data item</b>                                                                                                                        |
|-------------------------------------------------------|---------------------------------------------------------------------------------------------------------------------------------------------------|
| <b>Demographical variables</b>                        |                                                                                                                                                   |
| Age                                                   | Years                                                                                                                                             |
| Gender                                                | Female / male                                                                                                                                     |
| Education                                             | Basic education, intermediate education and university-level education                                                                            |
| <b>General health variables</b>                       |                                                                                                                                                   |
| Health-related quality of life                        | EuroQol EQ-5D-5L (Brooks et al., 1996)                                                                                                            |
| Sleep quality                                         | 11-point [0-10] Numerical Rating Scales, relating to current pain, from 'best possible sleep' to 'worst possible sleep' (Cappelleri et al., 2009) |
| <b>Psychosocial features</b>                          |                                                                                                                                                   |
| Coping strategies applied during a painful experience | Coping Strategies Questionnaire 27 [CSQ-27]( Monticone et al., 2014)                                                                              |

|                                                  |                                                                                                                                                                                                                                                                                                                                                     |
|--------------------------------------------------|-----------------------------------------------------------------------------------------------------------------------------------------------------------------------------------------------------------------------------------------------------------------------------------------------------------------------------------------------------|
| Anxiety and depression                           | Hospital Anxiety and Depression Scales [HADS] (Zigmond et al., 1983)                                                                                                                                                                                                                                                                                |
| Treatment expectation                            | Positive / negative expectation (Puentedura et al., 2012)                                                                                                                                                                                                                                                                                           |
| <b>TMD characteristics</b>                       |                                                                                                                                                                                                                                                                                                                                                     |
| Pain duration                                    | Days                                                                                                                                                                                                                                                                                                                                                |
| Pain intensity                                   | VAS: averaging ratings of current pain, average pain, and worst pain in the past week (Davis et al., 2014)                                                                                                                                                                                                                                          |
| Pain location                                    | Pain drawing as described by Shiffman et al. (2014) in the protocol of Diagnostic Criteria for TMD (DC/TMD)                                                                                                                                                                                                                                         |
| Central sensitization                            | Central Sensitization Inventory (CSI) (Mayer et al., 2012)                                                                                                                                                                                                                                                                                          |
| Classification of TMD                            | In according to DC/TMD (Shiffman et al., 2014) Taxonomic Classification of TMD: TMJ Disorders, Masticatory Muscle Disorders, Mixed Disorders                                                                                                                                                                                                        |
| Parafunction                                     | Oral Behaviours Checklist [OBC] (Ohrbach et al., 2008)                                                                                                                                                                                                                                                                                              |
| Characteristic pain intensity and disability     | RDC/TMD Axis II GCPS scores (Characteristic Pain Intensity (CPI) and disability points based on disability score and disability days) using the Italian version of the RDC/TMD questionnaire [www.rdc-tmdinternational.org]                                                                                                                         |
| Morning pain intensity after sleeping            | VAS: average pain at morning after sleeping in the past month                                                                                                                                                                                                                                                                                       |
| <b>TMJ and masticatory muscles clinical test</b> |                                                                                                                                                                                                                                                                                                                                                     |
| TMJ range of motion                              | Maximal Mouth Opening (MMO) without pain measured in mm through a ruler as described by Shiffman et al. (2014) in the DC/TMD protocol                                                                                                                                                                                                               |
| TMJ palpation pain                               | Dynamic TMJ lateral pole palpation [1 kg of palpation pressure] in according to DC/TMD protocol (Shiffman et al., 2014)<br>Score range: 0-1 [no pain =0; pain = 1]                                                                                                                                                                                  |
| Muscle palpation pain                            | Palpation in the following 6 bilateral points: lateral pterygoid area [0.5 kg intraoral palpation], temporalis tendon [0.5 kg intraoral palpation], masseter muscle [1 kg extraoral palpation] as described by Shiffman et al. (2014) in the DC/TMD protocol. Score range: 0-1 [< 3 sites with familiar pain = 0; ≥ 3 sites with familiar pain = 1] |
| JAw-test                                         | Immediate effects of brief intraoral MT techniques on pain [VRS] and TMJ range of motion [MMO]. A standardised procedure is fully described in Supplementary file S1.<br>Score range 0-2: [0 = no change; 1 = pain improvement or MMO improvement; 2 = improvement of both]                                                                         |

277

278

## 279 **Data handling**

280 Candidate predictors will be collected by independent physiotherapist assessor. All data  
281 will be confidentially secured by storing it on a password-protected computer attainable only  
282 by the principal investigators (GA). All individual details will be replaced with ID codes. At  
283 the end of the data collection, all data stored on the principal investigator's computer will be  
284 transferred securely to a server at the Centre of Precision Rehabilitation for Spinal Pain at  
285 Birmingham University where the data will be analysed. All data will be stored on a secure  
286 server at the University of Birmingham for a period of 10-years in line with Research  
287 Governance procedures. Data will be analysed using IBM SPSS Statistics (Version 25, IBM).

## 288 **Sample Size**

289 Exploratory factor analysis will be utilised to reduce the number of predictors (Fabrigar  
290 et al., 1999). This method will guarantee an adequate sample size (at least 10 cases per  
291 candidate predictor) to power the final regression analysis (Peduzzi et al., 1996; Vittinghoff et  
292 al., 2007). Data will be collected for a sample size of 100 participants so that, considering 10%  
293 of potential drops out, final data are available for 90 participants.

## 294 **Statistical analysis methods**

295 A flow diagram will report eligible participants, examined for eligibility, confirmed  
296 eligible, recruited into the study, completed follow-up and analysed. Reasons for non-  
297 participation, exclusion, drop-outs and withdrawal will be fully documented and all missing  
298 data of participants will be reported. Participant characteristics (candidate predictors - Table 1)  
299 will be summarised with a descriptive method.

300 A primary phase of the exploratory data analysis will  
301 summarise data to implement the predictive model (Shmueli, 2010).  
302 Multicollinearity between candidate predictors will be assessed at



1  
2  
3 303 baseline. Outcome [VAS pain intensity] will be split into good versus  
4  
5  
6 304 poor as described previously [good outcome: reduction in VAS score  
7  
8 305  $\geq 30\%$ ] (Haythornthwaite, 2010). Exploratory factor analysis will be  
9  
10  
11 306 applied to analyse factor loading of candidate predictors (summary  
12  
13  
14 307 scores) on good outcome at one month. This process will reduce  
15  
16 308 candidate predictors (supported by the cohort sample of 90) to enter  
17  
18  
19 309 into the final model.

20  
21 310 The statistical model has been designed a priori. To investigate the impact of each  
22  
23 311 predictive factor on good outcome, a logistic multivariable regression model will be performed.  
24  
25 312 For each candidate predictor, the mean differences or the odds ratio with their 95% confidence  
26  
27 313 intervals will be calculated. A multiple imputation analysis (Sterne et al., 2009) will be applied  
28  
29 314 to manage possible missing data. The multivariable analysis will initially consider all candidate  
30  
31 315 predictors. In the case of a high correlation between candidate predictors, a reduced  
32  
33 316 multivariate analysis will be considered.  
34  
35  
36  
37  
38

39 317

## 40 318 **DISCUSSION**

41  
42 319 There is a need to identify predictors for pain reduction in patients with TMD following  
43  
44 320 specific treatments in order to inform clinical decision-making. Several therapies are described  
45  
46 321 for patients with TMD such as the use of oral appliances, different types of physical therapy  
47  
48 322 modalities, pharmacology or temporomandibular joint arthrocentesis yet the amount of pain  
49  
50 323 relief that different people receive from each intervention is variable (Armijo-Olivo et al., 2016;  
51  
52 324 Calixtre et al., 2016). As shown by Forssell et al. (2016) and Kapos et al. (2018), many patients  
53  
54 325 continue to experience pain following such interventions. Investigating factors associated with  
55  
56 326 pain relief to such treatments can facilitate clinical assessment and treatment selection.  
57  
58  
59  
60



1  
2  
3 327 Physical therapy is one of the most common conservative interventions to treat TMD  
4  
5 328 (Calixtre et al., 2016). Among different physical therapy modalities, manual therapy can  
6  
7  
8 329 provide symptom and functional improvements (Armijo-Olivo et al., 2016) including pain  
9  
10 330 relief (Kalamir et al., 2013; Gomes et al., 2014). Knowledge of predictive factors associated  
11  
12 331 with good outcome to a specific intervention such as manual therapy applied to  
13  
14 332 craniomandibular structures will facilitate clinical decision making. Ultimately, such  
15  
16  
17 333 knowledge will lead to improved clinical and cost effectiveness of rehabilitation approaches.

### 18 19 334 **Quality assurance**

20  
21 335 Only participants that have not received therapeutic intervention for their TMD in the  
22  
23 336 past six months will be included in the current study. It is possible that such eligibility criteria  
24  
25 337 could generate selection bias. To address this potential bias, the number of eligible and included  
26  
27 338 subjects with the reason for non-participation will be documented.

### 28 29 339 **Patient and Public Involvement**

30  
31 340 The research question in this study was developed following consultations and  
32  
33 341 discussion with patients. Patients will not be involved in the analysis and data collection but  
34  
35 342 will contribute to data interpretation and production of a lay summary of the findings.

### 36 37 343 **Ethics and Dissemination**

38  
39 344 The research protocol has been submitted to the Ethics Committee of the “Fondazione  
40  
41 345 IRCCS Ca’ Granda Ospedale Maggiore Policlinico” and subsequently will be submitted to the  
42  
43 346 University of Birmingham Ethics Committee for approval. Researchers will inform all  
44  
45 347 participants on the characteristics of the research and will obtain written consent. Participants  
46  
47 348 will be informed that they are free to withdraw from the study at any time, without needing to  
48  
49 349 provide reason. Any concerns for a participant by the study team will be fed back to the primary  
50  
51 350 investigator (GA). Baseline characteristics of withdrawn participants will be compared to those  
52  
53  
54  
55  
56  
57  
58  
59  
60

1  
2  
3 351 of retained participants to assess for any differences. In the event of any unlikely adverse  
4  
5 352 events, this will be immediately reported by the principal investigator to the ethics committee.  
6  
7

8 353 The results of this study will submitted for publication in a peer review journal and  
9  
10 354 presented at conferences.  
11

12 355

### 14 356 **Limitations**

16  
17 357 The study could potentially generate a non-representative sample of patients with TMD  
18  
19 358 due to the exclusion of some participants, which may be more likely to commence other  
20  
21 359 treatments thereby reducing the external validity and the generalisability of the results.  
22  
23

### 24 360 **Conclusion**

25  
26 361 This will be the first study to identify factors associated with pain reduction following  
27  
28 362 manual therapy in patients with TMD and the knowledge gained from this study stands to  
29  
30 363 facilitate clinical decision making for manual therapists managing patients with TMD.  
31  
32

33 364

34  
35 365

36  
37 366

38  
39 367

40  
41 368

42  
43 369

44  
45 370

46  
47 371

### 48 372 **REFERENCES**

49 373

50 374 Abramowitz, M., & Stegun, I. A., eds. (1965). 'Handbook of Mathematical Functions'. New  
51 375 York, NY: *Dover*

52 376

53 377 Abbott, J., H., & Schmitt, J., (2014). 'Minimum important differences for the patient-specific  
54 378 functional scale, 4 region-specific outcome measures, and the numeric pain rating scale'.  
55 379 *Journal of Orthopaedic & Sports Physical Therapy*, 44(8):560-4.

- 1  
2  
3 380  
4 381 Antonarakis, G. S., Kalberer, N., Courvoisier, D. S., & Scolozzi, P., (2017). 'Clinical predictive  
5 382 factors for temporomandibular disorders following combined orthodontic and orthognathic  
6 383 surgical treatment in patients with Class III malocclusion'. *CRANIO*, 35(6), 397–404  
7 384  
8 385 Armijo-Olivo, S., Pitance, L., Singh, V., Neto, F., Thie, N., & Michelotti, A., (2016)  
9 386 'Effectiveness of Manual Therapy and Therapeutic Exercise for Temporomandibular  
10 387 Disorders: Systematic Review and Meta-Analysis'. *Physical Therapy*, 96(1): 9–25  
11 388  
12 389 Bair, E., Gaynor, S., Slade, G. D., Ohrbach, R., Fillingim, R. B., Greenspan, J. D., Dubner, R.,  
13 390 Smith, S. B., Diatchenko, L., & Maixner, W., (2016). 'Identification of clusters of individuals  
14 391 relevant to temporomandibular disorders and other chronic pain conditions: the OPPERA  
15 392 study'. *Pain*, 157(6):1266-78  
16 393  
17 394 Bialosky, J. E., Bishop, M. D., Price, D. D., Robinson, M. E., & George, S. Z., (2009). 'The  
18 395 mechanisms of manual therapy in the treatment of musculoskeletal pain: a comprehensive  
19 396 model'. *Man Ther*, 14:531–538.  
20 397  
21 398 Bishop, M. D., Torres-Cueco, R., Gay, C. W., Lluch-Girbés, E., Beneciuk, J. M., & Bialosky,  
22 399 J. E., (2015). 'What effect can manual therapy have on a patient's pain experience?'. *Pain  
23 400 management*, 5(6), 455-64.  
24 401  
25 402 Brooks, R., (1996). 'EuroQol: the current state of play'. *Health Policy*, 37(1):53-72.  
26 403  
27 404 Bryman, A., (2004). 'Social Research Methods'. 2<sup>nd</sup> ed. Oxford: *Oxford University Press*  
28 405  
29 406 Calixtre, L. B., Moreira, R. F. C., Franchini, G. H., Albuquerque-Sendín, F., & Oliveira, A.  
30 407 B. (2015). 'Manual therapy for the management of pain and limited range of motion in subjects  
31 408 with signs and symptoms of temporomandibular disorder: A systematic review of randomised  
32 409 controlled trials'. *Journal of Oral Rehabilitation*, 42(11), 847–861.  
33 410  
34 411 Calixtre, L. B., Grüniger, B. L. da S., Haik, M. N., Albuquerque-Sendín, F., & Oliveira, A.  
35 412 B. (2016) 'Effects of cervical mobilization and exercise on pain, movement and function in  
36 413 subjects with temporomandibular disorders: a single group pre-post test'. *Journal of Applied  
37 414 Oral Science*, 24(3): 188–197  
38 415  
39 416 Cappelleri, J. C., McDermott, A. M., Sadosky, A. B., Petrie, C. D., & Martin, S. (2009).  
40 417 'Psychometric properties of a single-item scale to assess sleep quality among individuals with  
41 418 fibromyalgia'. *Health Qual Life Outcomes*, 17(7):54.  
42 419  
43 420 Chatman, A. B., Hyams, S. P., Neel, J. M., Binkley, J. M., Stratford, P. W., Schomberg, A., &  
44 421 Stabler M. (1997). 'The Patient-Specific Functional Scale: measurement properties in patients  
45 422 with knee dysfunction'. *Physical therapy*; 77(8):820-9.  
46 423  
47 424 Clark, J., Nijs, J., Yeowell, G., & Goodwin, P. C., (2017). 'What Are the Predictors of Altered  
48 425 Central Pain Modulation in Chronic Musculoskeletal Pain Populations? A Systematic Review'.  
49 426 *Pain Physician*. 20(6):487-500  
50 427  
51 428 Cleland, J., & Palmer, J. (2004). 'Effectiveness of Manual Physical Therapy, Therapeutic  
52 429 Exercise, and Patient Education on Bilateral Disc Displacement Without Reduction of the  
53 430  
54  
55  
56  
57  
58  
59  
60

- 1  
2  
3 429 Temporomandibular Joint: A Single-Case Design'. *Journal of Orthopaedic & Sports Physical*  
4 430 *Therapy*, 34(9), 535–548  
5 431  
6 432 Cleland, J. A., Childs, J. D., Fritz, J. M., Whitman, J. M., & Eberhart, S. L., (2007).  
7 433 'Development of a Clinical Prediction Rule for Guiding Treatment of a Subgroup of Patients  
8 434 With Neck Pain: Use of Thoracic Spine Manipulation, Exercise, and Patient Education'.  
9 435 *Physical Therapy*, 87 (1): 9–23  
10 436  
11 437 Cohen, J., Cohen, P., West, S. G., & Aiken, L. S. (2003) 'Applied multiple  
12 438 regression/correlation analysis for the behavioral sciences (3rd ed.). Mahwah, NJ: *Lawrence*  
13 439 *Erlbaum Associates*.  
14 440  
15 441 Cohen, J. (1988). 'Statistical Power Analysis for the Behavioral Sciences' (2nd Edition).  
16 442 Hillsdale, NJ: *Lawrence Erlbaum Associates*  
17 443  
18 444 Collins, G. S., Reitsma, J. B., Altman, D. G. & Moons, K.G., (2015). 'Transparent reporting of  
19 445 a multivariable prediction model for individual prognosis or diagnosis (TRIPOD): the TRIPOD  
20 446 statement'. *BMC Medicine*, 13(1)  
21 447  
22 448 Cook, R. D., & Weisberg, S. (1982). 'Residuals and influence in regression'. New York, NY:  
23 449 *Chapman & Hall*.  
24 450  
25 451 Coskun Benlidayi, I., Salimov, F., Kurkcu, M., & Guzel, R. (2016). 'Kinesio-Taping for  
26 452 temporomandibular Disorders: Single-blind, randomized, controlled trial of effectiveness'. *J*  
27 453 *Back Musculoskelet Rehabil*, 29:373-380  
28 454  
29 455 Crockett, D. J., Foreman, M. E., Alden, L., & Blasberg, B. (1986). 'A comparison of treatment  
30 456 modes in the management of myofascial pain dysfunction syndrome'. *Biofeedback and self-*  
31 457 *regulation*, 11(4):279-291.  
32 458  
33 459 Davis, C. E., Stockstill, J. W., Stanley, W. D., & Wu, Q. (2014). 'Pain-related worry in patients  
34 460 with chronic orofacial pain'. *J Am Dent Assoc*. 145(7):722-30  
35 461  
36 462 De Leeuw, R., & Klasser, G. D. (2013) 'Orofacial pain guidelines for assessment, diagnosis,  
37 463 and management'. 5th ed. Hanover park, II: *Quintessence publishing*  
38 464  
39 465 Demirkol, N., Usumez, A., Demirkol, M., Sari, F., & Akcaboy, C. (2017). 'Efficacy of Low-  
40 466 Level Laser Therapy in Subjective Tinnitus Patients with Temporomandibular Disorders'.  
41 467 *Photomed Laser Surg*, 35(8): 427-431.  
42 468  
43 469 Dworkin, R. H., Turk, D. C., Farrar, J. T., Haythornthwaite, J. A., Jensen, M. P., Katz, N. P.,  
44 470 & Witter, J. (2005). 'Core outcome measures for chronic pain clinical trials : IMMPACT  
45 471 recommendations'. *Pain*, 113:9–19.  
46 472  
47 473 Fabrigar, L. R., Wegener, D. T., MacCallum, R. C., & Strahan, E. J. (1999). 'Evaluating the  
48 474 use of exploratory factor analysis in psychological research'. *Psychological Methods*, 4, 272–  
49 475 299.  
50 476  
51 477 Fernandez-de-las-Pena, C. & Mesa-Jimenez, J. (2018) 'Temporomandibular Disorders: manual  
52 478 Therapy, exercise and needling'. United Kingdom: *Handspring Publishing*

- 1  
2  
3 479  
4 480 Flynn, T., Fritz, J., Whitman, J., Wainner, R., Magel, J., Rendeiro, D., Butler, B., Garber, M.,  
5 481 & Allison, S., (2002). 'A clinical prediction rule for classifying patients with low back pain  
6 482 who demonstrate short-term improvement with spinal manipulation'. *Spine*. 27(24):2835-2843  
7 483  
8 484 Forssell, H., Kauko, T., Kotiranta, U., & Suvinen, T. (2017). 'Predictors for future clinically  
9 485 significant pain in patients with temporomandibular disorder: A prospective cohort study'.  
10 486 *European Journal of Pain*, 21(1), 188–197.  
11 487  
12 488 Friction, J., (1988). Physical evaluation: the need for a standardized examination. In: Friction  
13 489 J.R., ed. Temporomandibular joint and craniofacial pain: diagnosis and management. St Louis:  
14 490 *Ishiyaku Euroamerica*, pp 46–47.  
15 491  
16 492 Gomes, C. A., Politti, F., Andrade, D. V., de Sousa, D. F., Herpich, C. M., Dibai-Filho, A. V.,  
17 493 Gonzalez, Tde O., & Biasotto-Gonzalez, D. A. (2014). 'Effects of Massage Therapy and  
18 494 Occlusal Splint Therapy on Mandibular Range of Motion in Individuals With  
19 495 Temporomandibular Disorder: A Randomized Clinical Trial'. *Journal of Manipulative and  
20 496 Physiological Therapeutics*, 37(3), 164–169.  
21 497  
22 498 Grossmann, E., Poluha, R. L., Iwaki, L. C. V., Santana, R. G., & Filho, L. I. (2018). 'Predictors  
23 499 of arthrocentesis outcome on joint effusion in patients with disk displacement without  
24 500 reduction'. *Oral Surgery, Oral Medicine, Oral Pathology and Oral Radiology*, 125(4), 382–  
25 501 388.  
26 502  
27 503 Guarda-Nardini, L., Stecco, A., Stecco, C., Masiero, S., & Manfredini, D. (2012). 'Myofascial  
28 504 Pain of the Jaw Muscles: Comparison of Short-Term Effectiveness of Botulinum Toxin  
29 505 Injections and Fascial Manipulation Technique'. *CRANIO*, 30(2), 95–102  
30 506  
31 507 Guba, E. G., Lincoln, Y. S. (1981) 'Effective evaluation: Improving the usefulness of  
32 508 evaluation results through responsive and naturalistic approaches'. San Francisco: *Jossey-Bass*  
33 509  
34 510 Haefeli, M., & Elfering, A. (2005). 'Pain assessment: official publication of the European Spine  
35 511 Society, the European Spinal Deformity Society, and the European Section of the Cervical  
36 512 Spine Research Society'. *European spine journal*, 15 Suppl 1(Suppl 1), S17–S24  
37 513  
38 514 Haythornthwaite, J. A. (2010). IMMPACT recommendations for clinical trials: Opportunities  
39 515 for the RDC/TMD. *Journal of Oral Rehabilitation*, 37(10), 799–806.  
40 516  
41 517 Harland, N.J., & Georgieff K. 'Development of the coping strategies questionnaire 24, a  
42 518 clinically utilitarian version of the coping strategies questionnaire'. *Rehabilitation Psychology*  
43 519 2003;48(4):296–300.  
44 520  
45 521 Hefford, C., Abbott, J. H., Arnold, R., & Baxter G. D. (2012). 'The patient-specific functional  
46 522 scale: validity, reliability, and responsiveness in patients with upper extremity musculoskeletal  
47 523 problems'. *Journal of orthopaedic & sports physical therapy*; 42(2):56-65.  
48 524  
49 525 Higgins, J. P., Altman, D. G., Gøtzsche, P. C., Jüni, P., Moher, D., Oxman, A. D., Savovic, J.,  
50 526 Schulz, K. F., Weeks, L., & Sterne, J. A. (2011). 'The Cochrane Collaboration's tool for  
51 527 assessing risk of bias in randomised trials'. *BMJ*, 18;343:d5928  
52 528



- 1  
2  
3 529 Horn, K. K., Jennings, S., Richardson, G., Van Vliet, D., Hefford, C., & Abbott, J. H. (2012).  
4 530 'The patient-specific functional scale: psychometrics, clinimetrics, and application as a clinical  
5 531 outcome measure'. *Journal of orthopaedic & sports physical therapy*; 42(1):30-D17.  
6 532
- 7 533 Kalamir, A., Pollard, H., Vitiello, A., & Bonello, R. (2010). 'Intra-oral myofascial therapy for  
8 534 chronic myogenous temporomandibular disorders: a randomized, controlled pilot study'.  
9 535 *Journal of Manual & Manipulative Therapy*, 18(3), 139–146.  
10 536
- 11 537 Kalamir, A., Graham, P. L., Vitiello, A. L., Bonello, R., & Pollard, H. (2013). 'Intra-oral  
12 538 myofascial therapy versus education and self-care in the treatment of chronic, myogenous  
13 539 temporomandibular disorder: A randomised, clinical trial'. *Chiropractic and Manual  
14 540 Therapies*, 21(1)  
15 541
- 16 542 Kapos, F. P., Look, J. O., Zhang, L., Hodges, J. S., & Schiffman, E. L. (2018). 'Predictors of  
17 543 Long-Term Temporomandibular Disorder Pain Intensity: An 8-Year Cohort Study'. *Journal of  
18 544 Oral & Facial Pain and Headache*, 32(2), 113–122.  
19 545
- 20 546 Lipton, J. A., Ship, J. A., & Larach-Robinson, D. (1993) 'Estimated prevalence and distribution  
21 547 of reported orofacial pain in United States'. *J Am Dent Assoc*, 124: 115-112.  
22 548
- 23 549 Linton, S. J., & Boersma, K. (2003). 'Early identification of patients at risk of developing a  
24 550 persistent back problem: The predictive validity of the Orebro Musculoskeletal Pain  
25 551 Questionnaire'. *Clin J Pain* 19, 80–86.  
26 552
- 27 553 Mayer, T. G., Neblett, R., Cohen, H., Howard, K. J., Choi, Y. H., Williams, M. J., & Gatchel,  
28 554 R. J. (2012). 'The Development and Psychometric Validation of the Central Sensitization  
29 555 Inventory'. *Pain Practise*, 12(4), 276–285.  
30 556
- 31 557 Miernik, M., Wieckiewicz, M., & Paradowska, A. (2012) 'Massage therapy in myofascial  
32 558 TMD pain management'. *Adv Clin Exp Med*, 21(5):681-5  
33 559
- 34 560 Maughan, E. F., & Lewis, J. S. (2010). 'Outcome measures in chronic low back pain'.  
35 561 *European Spine Journal*, 1;19(9):1484-94.  
36 562
- 37 563 Nascimento, M., Vasconcelos, B. C., Porto, G. G., Ferdinanda, G., Nogueira, C. M., &  
38 564 Raimundo, R. D., (2013). 'Physical therapy and anesthetic blockage for treating  
39 565 temporomandibular disorders: a clinical trial'. *Med Oral Patol Oral Cir Bucal*, 1;18(1):81-5.  
40 566
- 41 567 NIDCR. Facial Pain (2014). *National Institute of Health* [Online].  
42 568 <http://www.nidcr.nih.gov/DataStatistics/FindDataByTopic/FacialPain/> [Accessed Dec 28  
43 569 2018]  
44 570
- 45 571 Peduzzi, P., Concato, J., Kemper, E., Holford, T. R., & Feinstein, A. R., (1996). 'A simulation  
46 572 study of the number of events per variable in logistic regression analysis. *J Clin Epidemiol*  
47 573 1996;49(12):1373-9.  
48 574
- 49 575 Plesh, O., Adams, S.H., & Gansky, S.A. (2011). 'Temporomandibular joint and muscle  
50 576 disorders-type pain and comorbid pains in a national US sample'. *J Orofacial Pain*, 25: 190-  
51 577 198.  
52 578

- 1  
2  
3 579 Rai, S., Ranjan, V., Misra, D., & Panjwani, S. (2016). 'Management of myofascial pain by  
4 580 therapeutic ultrasound and transcutaneous electrical nerve stimulation: A comparative study'.  
5 581 *Eur J Dent*, 10(1): 46-53.  
6 582
- 7 583 Rocabado, M. (1987). 'The importance of soft tissue mechanism in stability and instability of  
8 584 the cervical spine: a functional diagnosis for treatment planning'. *Cranio*, 5: 130-138.  
9 585
- 10 586 Rushton, A. B., Evans, D.W., Middlebrook, N., Heneghan, N. R., Small, C., Lord, J., Patel, J.  
11 587 M., & Falla, D. (2018). 'Development of a screening tool to predict the risk of chronic pain  
12 588 and disability following musculoskeletal trauma: protocol for a prospective observational study  
13 589 in the United Kingdom'. *BMJ Open*, 28;8(4):e017876  
14 590
- 15 591 Sainani, K. L., (2013). 'Multivariate Regression: The Pitfalls of Automated Variable  
16 592 Selection'. *Physical Medicine and Rehabilitation*, 5:791-94.  
17 593
- 18 594 Saks, M. & Allsop, J. (2013) 'Researching Health: Qualitative, Quantitative and Mixed  
19 595 Methods'. 2nd ed. London: Sage  
20 596
- 21 597 Sperandei, S. (2014). 'Understanding logistic regression analysis'. *Biochemia medica*, 24(1),  
22 598 12-8  
23 599
- 24 600 Schiffman, E., Ohrbach, R., Truelove, E., Look, J., Anderson, G., Goulet, J.-P., ... & Dworkin,  
25 601 S. F. (2014). 'Diagnostic Criteria for Temporomandibular Disorders (DC/TMD) for Clinical  
26 602 and Research Applications: Recommendations of the International RDC/TMD Consortium  
27 603 Network and Orofacial Pain Special Interest Group'. *Journal of Oral & Facial Pain and*  
28 604 *Headache*, 28(1)  
29 605
- 30 606 Shmueli, G. (2010). 'To explain or to predict?'. *Statistical Science*, 25(3):289-310.  
31 607
- 32 608 Schulz, K., Altman, D., & Moher, D. (2010) 'CONSORT 2010 Statement: Updated guidelines  
33 609 for reporting parallel group randomised trials'. *British Medical Journal*, 340:698-702  
34 610
- 35 611 Slade, G. D., Bair, E., Greenspan, J. D., Dubner, R., Fillingim, R. B., Diatchenko, L., Maixner,  
36 612 W., Knott, C., & Ohrbach, R., (2013). 'Signs and symptoms of first-onset TMD and  
37 613 sociodemographic predictors of its development: the OPPERA prospective cohort study'. *J*  
38 614 *Pain*, 14: T20-T32.  
39 615
- 40 616 Stelzenmueller, W., Umstadt, H., Weber, D., Goenner-oezkan, V., Kopp, S., & Lisson, J.  
41 617 (2015). 'Evidence - The intraoral palpability of the lateral pterygoid muscle - A prospective  
42 618 study'. *Annals of Anatomy*, 206:89-95.  
43 619
- 44 620 Sterne, J. A., White, I. R., Carlin, J. B., Spratt, M., Royston, P., Kenward, M. G., Wood, A. M.,  
45 621 & Carpenter, J. R., (2009). 'Multiple imputation for missing data in epidemiological and  
46 622 clinical research: potential and pitfalls'. *BMJ*, 338:b2393.  
47 623
- 48 624 Stratford, P., Gill, C., Westaway, M., & Binkley, J. (1995). 'Assessing disability and change  
49 625 on individual patients: a report of a patient specific measure'. *Physiotherapy Canada*, 47, 258-  
50 626 263  
51 627  
52  
53  
54  
55  
56  
57  
58  
59  
60

- 1  
2  
3 628 Sullivan, M. J. L., Bishop, S. R., & Pivik, J. (1995). 'The pain catastrophizing scale:  
4 629 Development and validation'. *Psychol Assess* 7, 524–532.  
5 630
- 6 631 Tuncer, A. B., Ergun, N., Tuncer, A. H., & Karahan, S. (2013). 'Effectiveness of manual  
7 632 therapy and home physical therapy in patients with temporomandibular disorders: A  
8 633 randomized controlled trial'. *Journal of Bodywork and Movement Therapies*, 17(3), 302–308.  
9 634
- 10 635 Van Oort, L., Van den Berg, T., Koes, B. W., de Vet, R. H., Anema, H. J., Heymans, M. W.,  
11 636 Verhagen, A. P., (2012). 'Preliminary state of development of prediction models for primary  
12 637 care physical therapy: a systematic review'. *J Clin Epidemiol*, 65(12):1257-66.  
13 638
- 14 639 Vigotsky, A. D., & Bruhns, R. P. (2015). 'The Role of Descending Modulation in Manual  
15 640 Therapy and Its Analgesic Implications: A Narrative Review'. *Pain research and treatment*,  
16 641 2015, 292805.  
17 642
- 18 643 Vittinghoff, E., & McCulloch, C. E., (2007). 'Relaxing the rule of ten events per variable in  
19 644 logistic and Cox regression'. *Am J Epidemiol*, 165(6):710-8.  
20 645
- 21 646 Von Elm, E., Altman, D. G., Egger, M., Pocock, S. J., Gøtzsche, P. C., & Vandenbroucke, J.  
22 647 P, (2008). 'The Strengthening the Reporting of Observational Studies in Epidemiology  
23 648 (STROBE)statement: guidelines for reporting observational studies'. *J Clin Epidemiol*,  
24 649 61(4):344-9  
25 650
- 26 651 von Piekartz, H., & Hall, T. (2013). 'Orofacial manual therapy improves cervical movement  
27 652 impairment associated with headache and features of temporomandibular dysfunction: A  
28 653 randomized controlled trial'. *Manual Therapy*, 18(4):345-50  
29 654
- 30 655 Weisberg, S. (2014). 'Applied linear regression' (4th ed.). New York, NY: *Wiley*
- 31 656 Westaway, M. D., Stratford, P. W., & Binkley, J. M. (1998). 'The patient-specific functional  
32 657 scale: validation of its use in persons with neck dysfunction'. *Journal of Orthopaedic & Sports*  
33 658 *Physical Therapy*; 27(5):331-8.
- 34 659 Wahlund, K., Nilsson, I. M., & Larsson, B. (2015) 'Treating temporomandibular disorders in  
35 660 adolescents: a randomized, controlled, sequential comparison of relaxation training and  
36 661 occlusal appliance therapy'. *J Oral Facial Pain Headache*, 29(1):41-50  
37 662
- 38 663 Woby, S. R., Roach, N. K., Urmston, M., Watson, P. J., (2005). 'Psychometric properties of  
39 664 the TSK-11: a shortened version of the Tampa Scale for Kinesiophobia'. *Pain*, 117(1-2):137-  
40 665 44.  
41 666
- 42 667 Zigmond, A. S., Snaith, R. P., (1983). 'The hospital anxiety and depression scale'. *Acta*  
43 668 *Psychiatr Scand*, 67(6):361-70  
44 669  
45 670

## 671 **Author Contributions**

672 GA, AEB and DF formulated the research question and study focus. GA drafted the initial  
673 version of the manuscript with DF. All authors provided guidance on topic, methodology and



1  
2  
3 674 analyses. All authors reviewed and commented on each draft of the protocol. All authors have  
4  
5 675 approved the final manuscript. DF is guarantor  
6  
7

8 676 **Funding Statement**  
9

10 677 This research received no specific grant from any funding agency in the public, commercial  
11  
12 678 or not-for-profit sectors.  
13

14 679 **Competing Interests Statement**  
15

16  
17 680 The authors have no competing interests to report.  
18

19 681 **Data sharing statement**  
20

21 682 No additional data are available.  
22  
23

24 683  
25

26 684  
27

28 685  
29

30 686  
31

32 687  
33

34 688  
35

36 689  
37

38 690  
39

40 691  
41

42 692 **FIGURE LEGEND**  
43

44 693  
45

46 694 **Figure 1:** Participant flow through the study  
47  
48  
49  
50  
51  
52  
53  
54  
55  
56  
57  
58  
59  
60

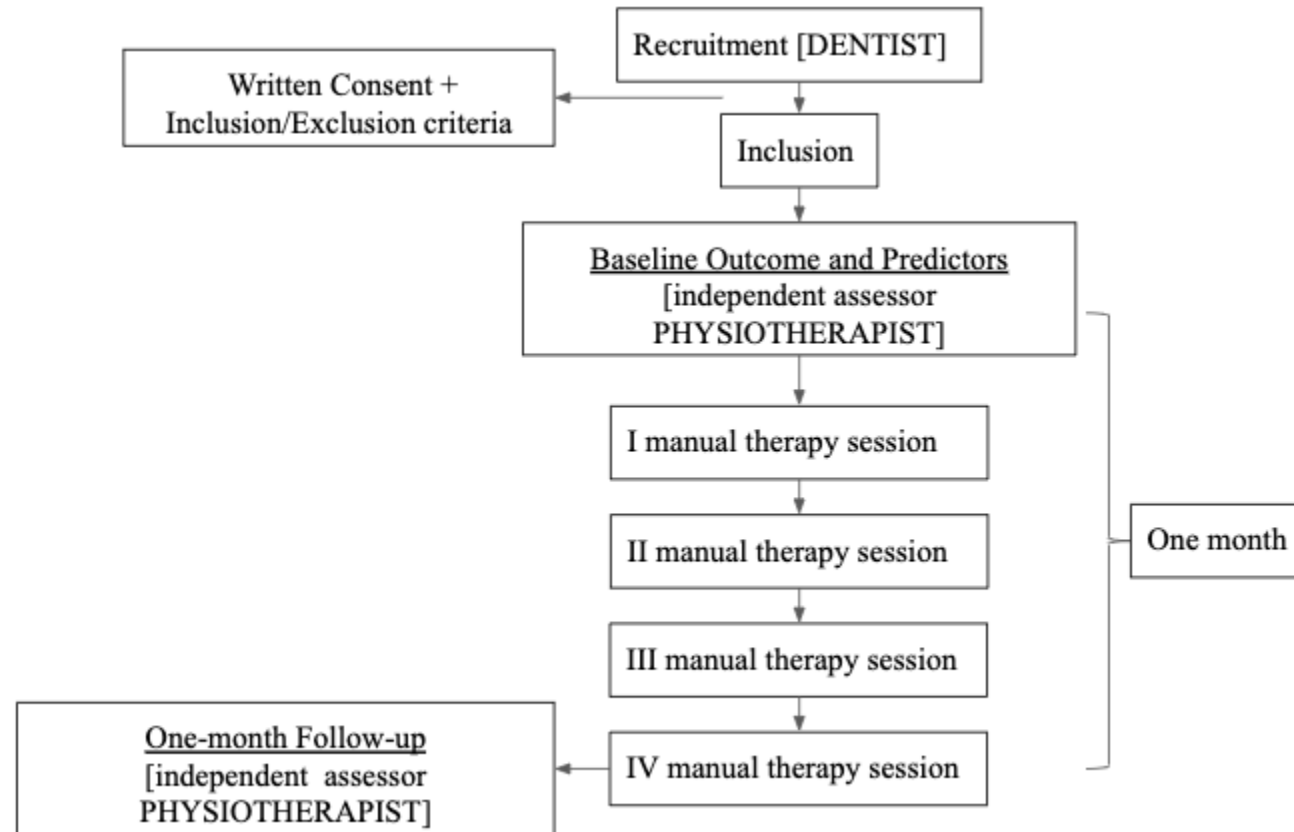

1  
2  
3  
4  
5  
6  
7  
8  
9  
10  
11  
12  
13  
14  
15  
16  
17  
18  
19  
20  
21  
22  
23  
24  
25  
26  
27  
28  
29  
30  
31  
32  
33  
34  
35  
36  
37  
38  
39  
40  
41

1  
2  
3 **1 PREDICTORS OF PAIN REDUCTION FOLLOWING MANUAL THERAPY IN**  
4 **2 PATIENTS WITH TEMPOROMANDIBULAR DISORDERS:**  
5 **3 A PROTOCOL FOR A PROSPECTIVE OBSERVATIONAL STUDY**  
6  
7  
8  
9  
10

11 **Supplementary file 1 - Candidate predictors**  
12  
13  
14  
15  
16  
17

18 ***Demographical variables***  
19  
20  
21

22 10 Participants' demographic variables [age, gender, education] will be collected at baseline  
23  
24 11 from open hospital records and patient interview.  
25  
26  
27

28 12 Age  
29  
30

31 13 Age is a significant factor in TMD incidence and prevalence. Lipton et al. (1993) found  
32  
33 14 different age-specific prevalence for face/jaw pain: 6.5% in aged 18-34, 5.0% in 35-54 years old,  
34  
35 15 4.0% in 55-74 years old and 3.9% in people > 74 year old, showing a prevalence reduction across  
36  
37  
38 16 the lifetime. By contrast, data from the OPPERA study (Fillingim et al., 2011) showed a 40%  
39  
40 17 increased risk for TMD among individuals aged 25-34 years and a 50% increased risk for TMD  
41  
42 18 among individuals aged 35-50 years.  
43  
44  
45

46 19 Gender  
47  
48  
49

50 20 Women are 1.5-2 times more likely to develop TMD than men (Helkimo, 1974; Von Korff  
51  
52 21 et al., 1988; Plesh et al., 2011). Currently, there is no study examining the extent of recovery from  
53  
54 22 TMD in men and women. Nevertheless, gender is a significant factor to be considered.  
55  
56  
57  
58  
59  
60

## 23 Education

24           The National Centre of Health and Statistic (NCHS) found that the differences in jaw pain  
25 prevalence among different educational groups are minimal. On the other hand, there is evidence  
26 that people with lower levels of education adopt maladaptive coping strategies, including a  
27 tendency to catastrophize about their pain (Roth et al., 2002). As a result, the education levels will  
28 be collected as candidate predictor of outcome by classifying education into three categories: basic  
29 education, intermediate education and university-level education.

## 30 *General health variable*

### 31 EuroQol Five Dimension Scale, 5-level [EQ-5D-5L]

32           According to Kapos et al. (2018), health-related quality of life can be a significant factor  
33 influencing treatment outcome for TMD. The results showed that a higher health-related quality  
34 of life predicted lower TMD pain intensity at an 8 year follow-up. Health-related quality of life  
35 will be measured using the Italian version of the EQ-5D-5L [www.euroqol.org]. This instrument  
36 transforms different health states into a single value with range 0-1 where 1 is perfect health, and  
37 it measures the patient's own judgement about his/her health outcome through a visual analogue  
38 scale range 0–100, representing respectively 'worst' to 'best' imaginable health state (Brooks,  
39 1996). The EQ-5D-5L, with 5 possible responses to each item, has increased inter-observer [ICC  
40 2,1 0.57] and test-retest [ICC 2,1 0.69] reliability compared to the previous EQ-5D-3L (Janssen et  
41 al., 2008). Additionally, it has less ceiling effects [20.8% reduction] and adequate convergent  
42 validity when compared with the WHO-5 [Spearman rank 0.38-0.51] (Janssen et al., 2013).

43

#### 44 Sleep quality

45 It is known that chronic pain patients may suffer from poor sleep quality, even if it is  
46 difficult to draw a causal relation (Sayar et al., 2002). Consequently, sleep quality will be assessed  
47 as a candidate predictor because of its possible role among other factors in the transition from acute  
48 to chronic pain. Sleep quality will be evaluated through an 11-point Numerical Rating Scale  
49 [NRS], where 0 is 'the best possible sleep' and 10 is 'the worst possible sleep'. This scale owns  
50 moderate psychometric properties in fibromyalgia patients to assess current sleep quality [over the  
51 previous 24 hour period] with a symptom diary (Cappelleri et al., 2009). We will use the 0-10 NRS  
52 to assess average sleep quality, related to the preceding 6-months at baseline (Rushton et al., 2018),  
53 although no psychometric properties have previously been reported for this recall period.

#### 54 *Psychosocial features*

55 Psychosocial factors are known to influence TMD onset and chronicity (Kight et al., 1999).  
56 Psychological distress is significantly linked to a greater severity and persistence of TMD pain  
57 (Dworkin et al., 1990). Moreover, depression and high levels of stress are significantly more  
58 common in people with chronic TMD (Keefe et al., 2004; Gatchel et al., 2007). In addition, there  
59 is agreement about the predictive strength of psychosocial factors in primary care among different  
60 musculoskeletal pain conditions (Mallen et al., 2007; Artus et al., 2017).

#### 61 The Hospital Anxiety and Depression Scales [HADS]

62 The Italian version of the HADS (Iani et al., 2014) will be utilised to investigate depression,  
63 anxiety and manifestations of somatic symptoms (Zigmond et al. 1983). This scale consists of two  
64 subscales [anxiety: HADS-A; depression: HADS-D] with 7 items and a total score from 0 to 21,

1  
2  
3 65 with a higher score indicating elevated levels of anxiety and depression (Bjelland et al., 2002).  
4  
5

6  
7 66 HADS has been studied in different groups confirming adequate to excellent internal  
8  
9 67 consistency of HADS-A [0.68-0.93] and HADS-D [0.67-0.90] (Bjelland et al., 2002). In a  
10  
11 68 coronary heart disease sample, the standard measurement of error was 1.37 for anxiety and 1.44  
12  
13 69 for depression; the minimal detectable change was 3.80 for anxiety and 3.99 for depression (Wang  
14  
15  
16 70 et al., 2009). The HADS has excellent concurrent validity in comparison to other  
17  
18 71 depression/anxiety scales (Bjelland et al., 2002).  
19  
20  
21

## 22 Coping Strategies Questionnaire 27 [CSQ-27] 23 24

25 73 Forssell et al. (2016) found that a low perceived ability to control pain increases the risk  
26  
27 74 for poor prognosis of TMD pain at one year regardless of the type of treatment. The Italian version  
28  
29 75 of the CSQ-27 (Monticone et al., 2014) will be used to provide an indication of coping strategies  
30  
31 76 used by participants when they are in pain. This 27-item questionnaire contains six domains to  
32  
33 77 assess the strategies for coping with pain: *Distraction*, *Catastrophizing*, *Ignoring pain sensations*,  
34  
35 78 *Distancing from pain*, *Coping self-statements*, and *Praying*. Patients rate the specific strategies for  
36  
37 79 coping with pain using a seven-point Likert scale [for each domain] ranging from 0 “Never do  
38  
39 80 that” to 6 “Always do that”, with higher scores indicating greater use (Robinson et al., 1997). A  
40  
41 81 recent study in a low back pain cohort (Campbell et al., 2013), in which individual items from  
42  
43 82 multiple questionnaires were factorised, suggested that diversion, reinterpreting and cognitive  
44  
45 83 coping clustered together as a single factor, representing coping cognitions; by contrast,  
46  
47 84 catastrophizing clustered with pain-related distress items. The original form was examined in  
48  
49 85 English-speaking subjects and revealed acceptable internal consistency [Cronbach’s alpha  
50  
51 86 estimates ranging from 0.72 to 0.86] and satisfying construct validity (Robinson et al., 1997).  
52  
53  
54  
55  
56  
57  
58  
59  
60

## 87 Treatment expectation

88 A positive treatment expectation is considered as a treatment moderator because of its  
89 influence on treatment outcome (Nicholas et al. 2011). A positive treatment expectation is  
90 predictive of good outcome because the expectation of benefit (placebo) has a robust effect on pain  
91 (Vase et al. 2009). In the current study we will investigate treatment expectation following the  
92 same protocol used by Puentedura et al (2012). Participants will be asked whether they  
93 “Completely disagree”, “Somewhat disagree”, “Neutral”, “Somewhat agree”, “Completely agree”  
94 with the following statement: “I believe that *manual techniques applied to my jaw* will  
95 significantly help to improve my pain”. If the participant chooses “completely disagree,”  
96 “somewhat disagree,” or “neutral,” there is not a positive expectation that manual therapy applied  
97 to craniomandibular structures will significantly help their temporomandibular disorder. If the  
98 participant chooses “somewhat agree” or “completely agree,” there is a positive expectation that  
99 manual therapy applied to craniomandibular structures will significantly help their  
100 temporomandibular disorder.

## 101 ***TMD characteristics***

102 Based on previous studies on predictive factors of outcome in TMD patients (Forssell et  
103 al., 2016; Grossman et al., 2017; Kapos et al., 2018), pain characteristics [e.g. pain duration, pain  
104 intensity, pain location] are good predictors for pain change in the long-term. In addition, across a  
105 variety of different conditions, pain features were reported to hold predictive value for pain  
106 modulation (Clay et al., 2012; Clay et al., 2010; Kamaleri et al., 2009; Mallen et al., 2007).

## 107 Pain Duration

1  
2  
3 108 According to Grossman et al. (2017), pain duration could be a significant factor influencing  
4  
5 109 the treatment outcome for TMD. Their results underline the fact that a longer pain duration is  
6  
7 110 associated with a more refractory therapeutic approach. Consequently, the pain duration [measured  
8  
9 111 in “days”] will be collected as candidate predictor of outcome from open hospital records and  
10  
11 112 patient interview.  
12  
13  
14

### 15 16 113 Pain intensity 17

18  
19 114 As shown in a previous study (Grossman et al., 2017), high levels of pain intensity at  
20  
21 115 baseline in people with TMD, can be associated with no-clinically significant results at a midterm  
22  
23 116 [3-4 months] follow up. Pain intensity will be calculated by averaging ratings of current pain,  
24  
25 117 average pain, and worst pain in the past week using the visual analogue scale (VAS), consisting  
26  
27 118 of a horizontal line measuring 10 cm (without marks), with “no pain” written at the left extremity,  
28  
29 119 and “unbearable pain” written at the right extremity (Wewers et al., 1990). Patients will be  
30  
31 120 educated to trace a perpendicular line on the horizontal line to intend the pain intensity. The  
32  
33 121 distance from the 0 points will be after measured in millimetres. The VAS is a reliable and valid  
34  
35 122 scale to assess pain intensity (Dworkin et al. 2005).  
36  
37  
38  
39  
40

### 41 123 Pain location and extent 42

43  
44 124 Forssell et al. (2016) found that a high number of pain conditions increases the risk for  
45  
46 125 poor prognosis of TMD pain at one year regardless of the type of treatment. Comorbid painful  
47  
48 126 areas are common in patients with TMD pain (Velly et al., 2013). Therefore, the pain location and  
49  
50 127 the pain extent will be collected as a candidate predictor of outcome. This will be recorded as  
51  
52 128 described by Shiffman et al., (2014) in the DC/TMD protocol (Dworkin et al., 1990; Macfarlane  
53  
54 129 et al., 1996; Margolis et al., 1988; Ohrbach et al., 2011; Sanders et al., 2013; Ohrbach et al., 2013).  
55  
56  
57  
58  
59



1  
2  
3 130 Patients will be asked to complete a pain drawing symbolising the spatial distribution of the pain,  
4  
5 131 over one chart with a frontal view of the body, one with a dorsal view and one with a dental setting  
6  
7 132 (more specific for the jaw and teeth pain). Pain reported in different body areas (e.g., headache,  
8  
9 133 back pain, pelvic pain, neck pain) can be summarised as a count variable. The extent of pain will  
10  
11 134 be calculated as % of the body area by using an image scanning software (ImageJ: Image  
12  
13 135 Processing and Analysis in Java, <http://imagej.nih.gov/ij/>; Klong Image Measurement:  
14  
15 136 <http://www.imagemasurement.com/experience-image-measurement/pain-assessment-image->  
16  
17 137 measurement)

### 138 139 Central Sensitization Inventory (CSI) (Mayer et al., 2012)

140 Central sensitization can be present in different pain disorders including low back pain  
141 (Roussel et al. , 2013), neck pain (Van Oosterwijck et al. , 2013), fibromyalgia (Desmeules et al. ,  
142 2014), and TMD (Fernández-de Las-Peñas et al. , 2009). The Italian version of the Central  
143 Sensitization Inventory (CSI) (Chiarotto et al., 2018) will be used. Part A consists of a 0-100 score  
144 for 25 items on current health symptoms with five options ranging from ‘never’ (0) to ‘always’  
145 (4). Part B examines previous physician diagnoses among seven different conditions (Mayer et al.,  
146 2012). The CSI has significant test-retest reliability and internal consistency in subjects with and  
147 without pain (Mayer et al., 2012). The Italian version of the CSI showed a satisfactory Cronbach’s  
148 alpha [0.87] (Chiarotto et al., 2018).

149

### 150 Classification of TMD

1  
2  
3 151 Manual therapy could potentially be beneficial for both myogenous and arthrogeous TMD  
4  
5 152 (Armijo-Olivo et al., 2016). The TMD type will therefore be collected as a candidate predictor of  
6  
7 153 outcome. As stated in the inclusion criteria, every patient included in the study will be diagnosed  
8  
9 154 according to the Axis I of the Diagnostic Criteria for TMD DC/TMD (Shiffman et al., 2014). Based  
10  
11 155 on these criteria, Shiffman et al., (2014) reported different types of TMD. This Taxonomic  
12  
13 156 Classification of TMD includes four main domains: TMJ Disorders, Masticatory Muscle  
14  
15 157 Disorders, Headache and Associated Disorders. An additional domain, called Mixed TMD  
16  
17 158 (simultaneous presence of TMJ Disorders and Masticatory Muscle Disorders) will be included.  
18  
19 159 For every patient the type of TMD (total of 5 domains) will be collected as candidate predictors  
20  
21  
22 160 from the patient medical records.  
23  
24  
25  
26

### 27 161 Characteristic pain intensity and disability

28  
29  
30

31 162 A greater number of disability days increases the risk of having clinically significant pain  
32  
33 163 one year after an initial assessment (Forssell et al., 2016). In this study we will use the Italian  
34  
35 164 version of the RDC/TMD questionnaire Axis II Graded Chronic Pain Scale [GCPS] version-2  
36  
37 165 [www.rdc-tmdinternational.org] (Von Korff et al., 1992; Von Korff et al., 2011) following the  
38  
39 166 DC/TMD protocol recommendations (Ohrbach et al., 2010; Shiffman et al. 2014; Ohrbach et al.,  
40  
41 167 2013). This scale has good internal consistency in temporomandibular pain [Cronbach's alpha of  
42  
43 168 0.84] (Von Korff et al. 1992). The GCPS measures the facial pain severity over the preceding 6-  
44  
45 169 months by unifying pain intensity and pain-related disability. The characteristic pain intensity  
46  
47 170 score [range: 0-100] is the mean of three pain intensity measurements: 'at the present time' and  
48  
49 171 'worst pain' and the 'average' pain over the preceding 6 months. The disability status is measured  
50  
51  
52 172 with a 0-6 point score derived from a combination of the number of disability days and the  
53  
54 173 disability level [range: 0-100; limitation given by pain in performing activities of daily living].  
55  
56  
57  
58  
59  
60

1  
2  
3 174 Based on these scores, the participant's chronic pain and disability status can be classified into one  
4  
5 175 of the five ordinal categories of chronic pain severity (Von Korff et al. 1992).  
6  
7

## 8 176 Parafunction

9  
10  
11 177 People with parafunctional behaviours with scores above 25 in the Oral Behaviours  
12  
13 178 Checklist [OBC] are 75% more likely to develop TMD than individuals with a score below 17  
14  
15 179 (Ohrbach et al., 2008; Ohrbach et al., 2012; Ohrbach et al., 2013). Parafunctional habits could play  
16  
17 180 a significant role in the development and the persistence of TMD pain (Glaros et al. 2016). In this  
18  
19 181 study we will use the Italian version of the RDC/TMD questionnaire Axis II Oral Behaviours  
20  
21 182 Checklist [www.rdc-tmdinternational.org] (Ohrbach et al., 2008; Ohrbach et al., 2012;) following  
22  
23 183 the DC/TMD protocol recommendations (Ohrbach et al., 2010; Shiffman et al. 2014). The OBC  
24  
25 184 measures the self-reported frequency over the preceding month of each of 21 activities involving  
26  
27 185 the jaw such as clenching the teeth or bracing the jaw (five ordinal response options, ranging from  
28  
29 186 "none of the time," coded 0, to "all of the time," coded 4). Psychometric properties of this  
30  
31 187 instrument suggest that it is valid, with patient behaviours matching those measured (Ohrbach et  
32  
33 188 al., 2008; Ohrbach et al., 2010; Markiewicz et al., 2006). Scoring is computed as the sum of the  
34  
35 189 number of items with non-zero response or as a weighted sum [e.g. the sum of the endorsed  
36  
37 190 frequencies of the respective items] (Ohrbach et al., 2008).  
38  
39  
40  
41  
42  
43

44 191

## 45 192 **Clinical tests of the TMJ and masticatory muscles**

### 46 193 TMJ range of motion

47  
48  
49  
50  
51 194 Mobility testing of the TMJ denotes an essential sign of TMD, it is one of the most reliable  
52  
53 195 clinical measures (Shiffman et al., 2014). Grossman et al. (2017) examined the preoperative  
54  
55  
56  
57  
58  
59  
60

1  
2  
3 196 variables of TMD patients with articular disc displacement without reduction that may alter the  
4  
5 197 effects of arthrocentesis on joint effusion. They observed that small maximum interincisal distance  
6  
7 198 influences treatment outcome. As a result, we will use the Maximal Mouth Opening (MMO)  
8  
9  
10 199 without pain as measure of TMJ range of motion. The measurements will be in millimeters and  
11  
12 200 will be taken with a ruler in a neutral craniocervical position [e.g. sitting or supine]. The distance  
13  
14 201 between the incisal edges of the maxillary and mandibular reference teeth, as described in the  
15  
16 202 DC/TMD protocol (Ohrbach et al., 2013), will be measured. Participants will be asked to open the  
17  
18 203 mouth as wide as they can without feeling any pain, or without increasing any present pain. The  
19  
20 204 tip of the ruler will be located against the incisal edge of the mandibular reference incisor, and the  
21  
22 205 distance to the mesial-distal center of the edge of the maxillary central incisor will be read. The  
23  
24 206 test will be repeated twice if the pain-free opening is less than 30mm (Ohrbach et al., 2013).  
25  
26 207 Assessment of mandibular ROM in a neutral craniocervical position obtained good inter- and intra-  
27  
28 208 rater reliability for MMO (Beltran-Alacreu et al. 2014).

29  
30  
31 209 TMJ palpation pain:  
32  
33

34  
35  
36  
37 210 Pain induced in joints via palpation is a useful clinical test that allows to understand if the  
38  
39 211 provoked pain duplicates or replicates the patient's pain complaint by identifying potential joint  
40  
41 212 origin (Ohrbach et al., 2013). For this palpation, finger pressure is calibrated [1.0 kg], as described  
42  
43 213 in the DC/TMD protocol (Ohrbach et al., 2013), using a simple hand-held algometer prior to  
44  
45 214 palpation examination. While the participant mandible is in a comfortable position or in a slightly  
46  
47 215 protruded position, the examiner's index finger will be placed just anterior to the tragus of the ear  
48  
49 216 and dorsal to the TMJ with the participant in neutral craniocervical position e.g. sitting or supine.  
50  
51 217 The index finger will press while orbiting around the lateral pole in a circular fashion over the  
52  
53 218 superior aspect of the condyle and then anteriorly [from the 9:00 to the 3:00 position, and then  
54  
55  
56  
57  
58  
59  
60

1  
2  
3 219 continuing fully around the condyle]. Palpation will last 5 seconds for each pressed point (Ohrbach  
4  
5 220 et al., 2013). If a participant complains of familiar pain in at least one pressed point the point score  
6  
7 221 of this test will be 1; if there is no pain at any points the point score of this test will be 0 [range 0-  
8  
9 222 1: no pain =0; pain = 1]. Palpation will be performed in the left and right side. The interexaminer  
10  
11 223 reliability values of TMJ palpation in TMD patients is 0.59 and the specificity values is acceptable  
12  
13 224 [above 0.90] (Gomes et al. 2008).

### 14 15 16 17 18 225 Muscle palpation pain

19  
20  
21 226 For this assessment, finger pressure is calibrated to 1.0 kg for masseter muscles and 0.5 kg  
22  
23 227 for lateral pterygoid area and temporalis tendons as described in the DC/TMD protocol (Ohrbach  
24  
25 228 et al., 2013), using a simple hand-held algometer prior to palpation examination. Pain induced in  
26  
27 229 muscles via palpation is a useful clinical test that allows to understand whether the provoked pain  
28  
29 230 duplicates or replicates the patient's pain complaint by identifying potential muscular origin  
30  
31 231 (Ohrbach et al., 2013). Palpation will be performed with the participant in a neutral craniocervical  
32  
33 232 position (e.g. sitting or supine), on the left and right side and will last 5 seconds for each testing  
34  
35 233 point (Ohrbach et al., 2013). The inter-examiner reliability values of palpation in TMD patients is  
36  
37 234 0.59 and the specificity values are acceptable [above 0.90] (Gomes et al. 2008).

38  
39  
40  
41  
42 235 *Lateral pterygoid area:* palpation will be performed with a finger pressure calibrated at 0.5  
43  
44 236 kg (DC/TMD protocol - Ohrbach et al., 2013). The palpation will take place as described in FIG.1.  
45  
46 237 If a participant complains of familiar pain during palpation, then the lateral pterygoid area will be  
47  
48 238 considered as a painful site.

239

240 **FIG. 1 Lateral pterygoid area:** Palpation of the vestibule in a  
 241 posterior-superior-medial direction while the mandible is  
 242 omolaterally deviated.

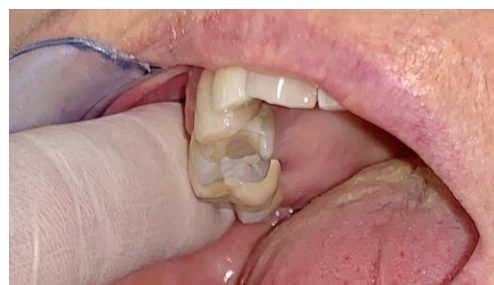

244 *Masseter muscle:* masseter palpation consists of  
 245 a sequence of three palpation sites with finger pressure calibrated to 1.0 kg (DC/TMD protocol -  
 246 Ohrbach et al., 2013): origin zone [inferior to the bony margin of the zygomatic process], body  
 247 zone [in front of ear lobe] and insertion zone [superior to the mandibular angle]. In each zone, the  
 248 palpation continues until the anterior boundary of the muscle is reached (Ohrbach et al., 2013). If  
 249 a participant complains of familiar pain in at least one location, then the masseter muscle will be  
 250 considered as a painful site.

251 *Temporalis tendon area:* the palpation will be performed with a finger pressure calibrated  
 252 to 0.5 kg (DC/TMD protocol - Ohrbach et al., 2013). The palpation will take place as described in  
 253 FIG.2. If a participant complains of familiar pain during the palpation of the temporalis tendon,  
 254 then this area will be considered as a painful site.

255

256 **FIG. 2 Temporalis tendon area:** Palpation against the ascending  
 257 mandibular ramus while the mouth is slightly open. The palpation  
 258 direction is superior as far as possible by following the bone surface.

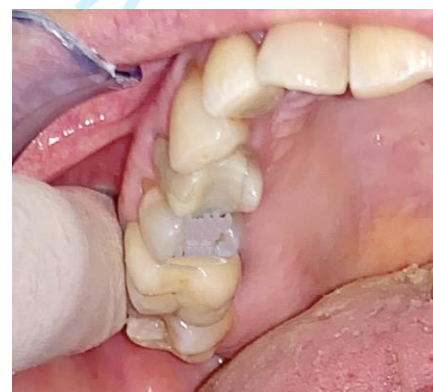

259

260

261 *Total score:* if a participant complains of familiar pain in at least three of the six examined

1  
2  
3 262 sites the score will be 1, otherwise it will be 0 [score range 0–1: < 3 sites with familiar pain = 0; ≥  
4  
5 263 3 sites with familiar pain = 1] (Friction et al., 1988).

7  
8  
9 264 JAw-test

10  
11  
12 265 The JAw-test is a clinical test that aims to investigate the immediate effects of four brief  
13  
14 266 intraoral manual therapy techniques on pain and on TMJ range of motion. The participant will be  
15  
16 267 positioned in supine. Before starting the test, the pain-free range of motion of the TMJ will be  
17  
18 268 measured [MMO - millimeters] with a ruler, as described above, according to the DC/TMD  
19  
20 269 protocol (Ohrbach et al., 2013). Then the participant will be asked to rate his/her pain through the  
21  
22 270 Verbal Rating Scale (VRS) “at rest”, “during clenching” and “during the maximal opening of the  
23  
24 271 mouth”; and the average of the three pain scores will be registered. For this test, finger pressure is  
25  
26 272 calibrated [1.0 kg], in the same way described in the DC/TMD protocol (Ohrbach et al., 2013),  
27  
28 273 using a simple hand-held algometer prior to palpation examination.

29  
30  
31  
32 274 Participants will be informed with the following words: “*I am going to perform four manual*  
33  
34 275 *techniques on some muscles and joints in your jaw region. You may feel a little pain, if the pain*  
35  
36 276 *increases and becomes too intense, let me know, I will reduce the pressure until the pain returns*  
37  
38 277 *to acceptable levels*”.

39  
40  
41  
42 278 *First technique: Lateral pterygoid area*

43  
44 279 This techniques will be performed on the most painful side. While one hand stabilizes the  
45  
46 280 participant’s head on the least painful side, the other hand will be used to apply pressure over the  
47  
48 281 lateral pterygoid area as described above and in accordance with the DC/TMD protocol (Ohrbach  
49  
50 282 et al., 2013). In this position, compression [1.0 kg] is applied for 30-60 seconds.

51  
52  
53 283 *Second technique: Temporalis tendon area*

54  
55 284 This technique will be performed on the most painful side. While one hand stabilizes the



1  
2  
3 285 participant's head on the least painful side, the other hand (index finger) will be used to apply  
4  
5 286 pressure over the Temporalis tendon area as described above and in accordance with the DC/TMD  
6  
7 287 protocol (Ohrbach et al., 2013). In this position, compression [1.0 kg] is applied for 30-60 seconds.  
8  
9

10 288 *Third technique: Mylohyoid area*

11  
12 289 The participant will be instructed to open the mouth to let the examiner's finger reach the  
13  
14 290 mylohyoid area in a central position on the mylohyoid raphe. The other hand of the examiner will  
15  
16 291 reach the same area using a finger through an extraoral approach. In this position a combined  
17  
18 292 compression (1.0 kg) will be applied for 30-60 seconds.  
19  
20

21 293 *Fourth technique: TMJ mobilization*

22  
23 294 An intraoral ventral and caudal anterior glide [mobilisation grades I and II] of both the  
24  
25 295 TMJs will be performed for 30 seconds as described by Cleland et al. (2004).  
26  
27

28 296 *Final scores:*

29  
30 297 After the tests, the pain-free range of motion of the TMJ will be measured [MMO -  
31  
32 298 millimeters] with a ruler, as described above, according to DC/TMD protocol (Ohrbach et al.,  
33  
34 299 2013). Then the participant will be asked to rate his/her pain using the Verbal Rating Scale (VRS)  
35  
36 300 "at rest", "during clenching" and "during the maximal opening of the mouth"; an average of this  
37  
38 301 three pain scores will be registered. If a participant shows only an improvement in pain [average  
39  
40 302 score VRS pre-test > average score VRS post-test] the score will be 1; if a participant shows only  
41  
42 303 an improvement of TMJ mobility [MMO pre-test < MMO post-test at least 2 millimeters] the score  
43  
44 304 will be 1; if a participant shows improvements in both pain and TMJ mobility, the score will be 2;  
45  
46 305 if a participant shows no improvements the score will be 0 [Score range 0-2: 0 = no change; 1 =  
47  
48 306 VRS improvement or MMO improvement; 2 = improvement of both].  
49  
50  
51  
52  
53

54 307



308 **REFERENCES**

309  
310 Armijo-Olivo, S., Pitance, L., Singh, V., Neto, F., Thie, N., & Michelotti, A. (2016) 'Effectiveness  
311 of Manual Therapy and Therapeutic Exercise for Temporomandibular Disorders: Systematic  
312 Review and Meta-Analysis'. *Physical Therapy*, 96(1): 9–25

313  
314 Artus M, Campbell P, Mallen CD, et al. Generic prognostic factors for musculoskeletal pain in  
315 primary care: a systematic review. *BMJ Open* 2017;7(1):e012901.

316  
317 Beltran-Alacreu, H., López-de-Uralde-Villanueva, I., Paris-Alemany, A., Angulo-Díaz-Parreño,  
318 S., & La Touche, R. (2014). Intra-rater and Inter-rater Reliability of Mandibular Range of Motion  
319 Measures Considering a Neutral Craniocervical Position. *Journal of physical therapy science*,  
320 26(6), 915-20.

321  
322 Bjelland I, Dahl AA, Haug TT, et al. The validity of the Hospital Anxiety and Depression Scale.  
323 An  
324 updated literature review. *J Psychosom Res* 2002;52(2):69-77.

325  
326 Brooks R. EuroQol: the current state of play. *Health Policy* 1996;37(1):53-72.

327  
328 Campbell P, Foster NF, Thomas E, Dunn KM. Prognostic Indicators of Low Back Pain in  
329 Primary  
330 Care: Five-Year Prospective Study. *J Pain* 2013;14(8):873–83.

331  
332 Cappelleri JC BA, McDermott AM, Sadosky AB, Petrie CD, Martin S.( 2009) 'Psychometric  
333 properties of a single-item scale to assess sleep quality among individuals with fibromyalgia.  
334 Health Qual Life Outcomes' ;17(7):54.

335  
336 Chiarotto A, Viti C, Sulli A, Cutolo M, Testa M, Piscitelli D. (2018). 'Cross-cultural adaptation  
337 and validity of the Italian version of the Central Sensitization Inventory'. *Musculoskelet Sci*  
338 *Pract.*37:20-28.

339  
340 Chiu C JJ, Fujikawa M, Strand D, Cheing G, Lee G, Chan F Measurement Structure of the  
341 Coping Strategies Questionnaire-24 in a Sample of Individuals with Musculoskeletal Pain: A  
342 Confirmatory Factor Analysis. . *Rehabilitation Research, Policy, and Education* 2014;28(2):80-  
343 90.

344  
345 Clay FJ, Watson WL, Newstead SV, et al. A systematic review of early prognostic factors for  
346 persisting pain following acute orthopedic trauma. *Pain Res Manag* 2012;17(1):35-44.

347  
348 Clay FJ, Newstead SV, Watson WL, et al. Bio-psychosocial determinants of persistent pain 6  
349 months after non-life-threatening acute orthopaedic trauma. *J Pain* 2010;11(5):420-30. doi:  
350 10.1016/j.jpain.2009.12.002

351

- 1  
2  
3 352 Cleland, J., & Palmer, J. (2004). 'Effectiveness of Manual Physical Therapy, Therapeutic Exercise,  
4 353 and Patient Education on Bilateral Disc Displacement Without Reduction of the  
5 354 Temporomandibular Joint: A Single-Case Design'. *Journal of Orthopaedic & Sports Physical  
6 355 Therapy*, 34(9), 535–548  
7  
8 356  
9 357 Desmeules J, Chabert J, Rebsamen M, Rapiti E, Piguet V, Besson M, et al. (2014). 'Central pain  
10 358 sensitization, COMT Val158Met polymorphism, and emotional factors in fibromyalgia'. *The  
11 359 Journal of Pain*, 15:129-35.  
12  
13 360  
14 361 Dworkin, R. H., Turk, D. C., Farrar, J. T., Haythornthwaite, J. A., Jensen, M. P., Katz, N. P., ...  
15 362 Witter, J. (2005). Core outcome measures for chronic pain clinical trials : IMMPACT  
16 363 recommendations. *Pain*, 113:9–19.  
17  
18 364  
19 365 Dworkin SF, Von Korff MR, LeResche L. Multiple pains and psychiatric disturbance: An  
20 366 epidemiologic investigation. *Archives of General Psychiatry* 1990;47:239-44.  
21 367  
22 368 Edwards RR, Dworkin RH, Turk DC, Angst MS, Dionne R, Freeman R, et al. (2016). 'Patient  
23 369 phenotyping in clinical trials of chronic pain treatments: IMMPACT recommendations'. *Pain*,  
24 370 157:1851-71.  
25 371  
26 372 Fernández-de-Las-Peñas C, Galán-del-Río F, Fernández-Carnero J, Pesquera J, Arendt Nielsen  
27 373 L, Svensson P. (2009). 'Bilateral widespread mechanical pain sensitivity in women with  
28 374 myofascial temporomandibular disorder: evidence of impairment in central nociceptive  
29 375 processing'. *The Journal of Pain*, 10:1170-8.  
30 376  
31 377 Fillingim RB, Ohrbach R, et al., (2011). 'Potential psychosocial risk factors for chronic TMD:  
32 378 descriptive data and empirically identified domains from the OPPERA case-control study'. *J  
33 379 Pain*, 2: T46-T60  
34 380  
35 381 Forssell, H., Kauko, T., Kotiranta, U., & Suvinen, T. (2017). Predictors for future clinically  
36 382 significant pain in patients with temporomandibular disorder: A prospective cohort study.  
37 383 *European Journal of Pain*, 21(1), 188–197.  
38 384  
39 385 Friction J. Physical evaluation: the need for a standardized examination. In: Friction JR, ed.  
40 386 Temporomandibular joint and craniofacial pain: diagnosis and management. St Louis: Ishiyaku  
41 387 Euroamerica; 1988:46–47.  
42 388  
43 389 Gatchel RJ, Peng YB, Peters ML, Fuchs PN, Turk DC. (2007). 'The biopsychosocial approach to  
44 390 chronic pain: scientific advances and future directions'. *Psychol Bull*, 133(4):581-624.  
45 391  
46 392 Glaros, A. G., Marszalek, J. M., & Williams, K. B. (2016). Longitudinal Multilevel Modeling of  
47 393 Facial Pain, Muscle Tension, and Stress. *Journal of dental research*, 95(4), 416-22.  
48 394  
49 395 Gomes MB, Guimarães JP, Guimarães FC, Neves AC. (2008). 'Palpation and pressure pain  
50 396 threshold: reliability and validity in patients with temporomandibular disorders'. *Cranio*,  
51 397 26(3):202-10.  
52  
53  
54  
55  
56  
57  
58  
59  
60

- 1  
2  
3 398  
4 399  
5 400 Grossmann, E., Poluha, R. L., Iwaki, L. C. V., Santana, R. G., & Filho, L. I. (2018). 'Predictors  
6 401 of arthrocentesis outcome on joint effusion in patients with disk displacement without reduction'.  
7 402 *Oral Surgery, Oral Medicine, Oral Pathology and Oral Radiology*, 125(4), 382–388.  
8 403  
9  
10 404 Harland NJ Georgieff K. Development of the coping strategies questionnaire 24, a clinically  
11 405 utilitarian version of the coping strategies questionnaire. *Rehabilitation Psychology*  
12 406 2003;48(4):296–300.  
13 407  
14  
15 408 Haythornthwaite, J. A. (2010). IMMPACT recommendations for clinical trials: Opportunities for  
16 409 the RDC/TMD. *Journal of Oral Rehabilitation*, 37(10), 799–806.  
17 410  
18 411 Helkimo M. (1974). 'Studies on function and dysfunction of the masticatory system. IV. Age and  
19 412 sex distribution of symptoms of dysfunction of the masticatory system in Lapps in the north of  
20 413 Finland'. *Acta Odontol Scand*, 32(4):255-67.  
21 414  
22  
23 415 Iani, L., Lauriola, M., & Costantini, M. (2014). 'A confirmatory bifactor analysis of the Hospital  
24 416 Anxiety and Depression Scale in an Italian community sample'. *Health and quality of life*  
25 417 *outcomes*, 12, 84.  
26 418  
27  
28 419 Janssen MF, Birnie E, Haagsma JA, et al. Comparing the standard EQ-5D three-level system  
29 420 with a  
30  
31 421 five-level version. *Value Health* 2008;11(2):275-84.  
32 422  
33  
34 423 Janssen MF, Pickard AS, Golicki D, et al. Measurement properties of the EQ-5D-5L compared  
35 424 to  
36 425 the EQ-5D-3L across eight patient groups: a multi-country study. *Qual Life Res*  
37 426 2013;22(7):1717-27.  
38 427  
39  
40 428 Kamaleri Y, Natvig B, Ihlebaek CM, et al. Change in the number of musculoskeletal pain sites:  
41 429 A  
42  
43 430 14-year prospective study. *Pain* 2009;141(1-2):25-30. doi: 10.1016/j.pain.2008.09.013  
44 431  
45 432 Kapos, F. P., Look, J. O., Zhang, L., Hodges, J. S., & Schiffman, E. L. (2018). 'Predictors of  
46 433 Long-Term Temporomandibular Disorder Pain Intensity: An 8-Year Cohort Study'. *Journal of*  
47 434 *Oral & Facial Pain and Headache*, 32(2), 113–122.  
48 435  
49  
50 436 Keefe FJ, Rumble ME, Scipio CD, Giordano LA, Perri LM.( 2004). 'Psychological aspects of  
51 437 persistent pain: current state of the science'. *J Pain*, 5(4):195-211.  
52 438  
53  
54 439 Keilani, M., Crevenna, R., & Dorner, T. E. (2017). Sleep quality in subjects suffering from  
55 440 chronic pain. *Wiener klinische Wochenschrift*, 130(1-2), 31-36.  
56 441  
57  
58  
59

- 1  
2  
3 442 Kight M, Gatchel RJ, Wesley L. (1999). 'Temporomandibular disorders: evidence for significant  
4 443 overlap with psychopathology'. *Health Psychol.* 18(2):177-82.  
5 444
- 6 445 Lipton JA, Ship JA, Larach-Robinson D. Estimated prevalence and distribution of reported  
7 446 orofacial pain in United States. *J Am Dent Assoc* 1993; 124: 115-112.  
8 447
- 9 448 Macfarlane, G. J., et al. (1996). Widespread pain: is an improved classification possible? *Journal*  
10 449 *of*  
11 450 *Rheumatology* 23(9): 1628-1632.  
12 451
- 13 452 Mallen CD, Peat G, Thomas E, et al. Prognostic factors for musculoskeletal pain in primary care:  
14 453 a  
15 454 systematic review. *Br J Gen Pract* 2007;57(541):655-61.  
16 455
- 17 456 Margolis, R. B., et al. (1988). Test-retest reliability of the pain drawing instrument. *Pain* 33: 49-  
18 457 51.  
19 458
- 20 459 Markiewicz MR, Ohrbach R, McCall WD Jr. (2006). 'Oral behaviors checklist: Reliability of  
21 460 performance in targeted waking-state behaviors'. *J Orofacial Pain* 20:306-316  
22 461
- 23 462 Monticone, M., Ferrante, S., Giorgi, I., Galandra, C., Rocca, B., & Foti, C. (2014). The 27-item  
24 463 coping strategies questionnaire-revised: confirmatory factor analysis, reliability and validity in  
25 464 Italian-speaking subjects with chronic pain. *Pain research & management*, 19(3), 153-8.  
26 465
- 27 466 NCHS. Summary Health Statistics Tables for the U.S. Population: National Health Interview  
28 467 Survey, 2014 (12/2015) [Online]. CDC/National Centre of Health and Statistics. Available:  
29 468 <http://www.cdc.gov/nchs/nhis/SHS/tables.htm> [March 10, 2019]  
30 469
- 31 470 Nicholas MK, Linton SJ, Watson PJ, Main CJ. (2011). 'Early identification and management of  
32 471 psychological risk factors ("yellow flags") in patients with low back pain: a reappraisal'. *Phys*  
33 472 *Ther*, 91:737-753.  
34 473
- 35 474 Ohrbach R, Gonzalez Y, List T, Michelotti A, Schiffman E. Diagnostic Criteria for  
36 475 Temporomandibular Disorders (DC/TMD) Clinical Examination Protocol: Version 02June2013.  
37 476 [www.rdc-tmdinternational.org](http://www.rdc-tmdinternational.org) Accessed on <March 10, 2019>.  
38 477
- 39 478 Ohrbach R, Fillingim RB, Mulkey F, et al. Clinical findings and pain symptoms as potential risk  
40 479 factors for  
41 480 chronic TMD: Descriptive data and empirically identified domains from the OPPERA case-  
42 481 control  
43 482 study. *Journal of Pain* 2011;12 (11, Supplement 3):T27-T45.  
44 483
- 45 484 Ohrbach R, List T, Goulet J-P, Svensson P. Recommendations from the International Consensus  
46 485 Workshop:  
47 486 Convergence on an Orofacial Pain Taxonomy. *Journal of Oral Rehabilitation* 2010;37:807-12.  
48 487

- 1  
2  
3 488 Ohrbach, R., et al. (2008). "Waking-state oral parafunctional behaviors: specificity and validity  
4 489 as assessed by electromyography." *European Journal of Oral Sciences* 116: 438-444.  
5 490
- 6 491 Ohrbach, R., et al. (2011). "Clinical findings and pain symptoms as potential risk factors for  
7 492 chronic TMD: Descriptive data and empirically identified domains from the OPPERA case-  
8 493 control study." *Journal of Pain* 12(11, Supplement 3): T27-T45.  
9 494
- 10 495 Ohrbach, R., et al. (2013). "Clinical orofacial characteristics associated with risk of first-onset  
11 496 TMD: the OPPERA prospective cohort study." *Journal of Pain* 14 (Supplement 2)(12): T33-T50.  
12 497
- 13 498 Plesh, O., Adams, S.H., Gansky, S.A. (2011). 'Temporomandibular joint and muscle disorders-  
14 499 type pain and comorbid pains in a national US sample'. *J Orofacial Pain*, 25: 190-198.  
15 500
- 16 501 Puentedura EJ, Cleland JA, Landers MR, Mintken PE, Louw A, Fernández-de-Las-Peñas C.  
17 502 (2012). 'Development of a clinical prediction rule to identify patients with neck pain likely to  
18 503 benefit from thrust joint manipulation to the cervical spine'. *J Orthop Sports Phys Ther*, 42(7):577-  
19 504 92.  
20 505
- 21 506 Robinson ME, Riley JL 3rd, Myers CD, Sadler IJ, Kvaal SA, Geisser ME, Keefe FJ. (1997). 'The  
22 507 Coping Strategies Questionnaire: a large sample, item level factor analysis'. *Clin J Pain*, 13(1):43-  
23 508 9  
24 509
- 25 510 Rosenstiel AK KF. The use of coping strategies in chronic low back pain patients: Relationship  
26 511 to  
27 512 patient characteristics and current adjustment. . *Pain* 1983;17: 33-44.  
28 513
- 29 514 Roth RS, Geisser ME. (2002). 'Educational achievement and chronic pain disability: mediating  
30 515 role of pain-related cognitions'. *Clin J Pain*, 18(5):286-96  
31 516
- 32 517 Roussel NA, Nijs J, Meeus M, Mylius V, Fayt C, Oostendorp R. (2013). 'Central sensitization and  
33 518 altered central pain processing in chronic low back pain: fact or myth?'. *The Clinical journal 216*  
34 519 *of pain*, 29:625-38.  
35 520
- 36 521 Rushton AB, Evans DW, Middlebrook N, Heneghan NR, Small C, Lord J, Patel JM, Falla D.  
37 522 (2018). 'Development of a screening tool to predict the risk of chronic pain and disability following  
38 523 musculoskeletal trauma: protocol for a prospective observational study in the United Kingdom'.  
39 524 *BMJ Open*, 28;8(4):e017876  
40 525
- 41 526 Sanders AE, Slade GD, Bair E, et al. General health status and incidence of first-onset  
42 527 temporomandibular disorder: OPPERA prospective cohort study. *Journal of Pain* 2013.  
43 528
- 44 529 Sayar K, Arıkan M, Yontem T.(2002). 'Sleep quality in chronic pain patients'. *Can J Psychiatry*,  
45 530 47(9):844-8.  
46 531
- 47 532 Schiffman, E., Ohrbach, R., Truelove, E., Look, J., Anderson, G., Goulet, J.-P., ... Dworkin, S. F.  
48 533 (2014). 'Diagnostic Criteria for Temporomandibular Disorders (DC/TMD) for Clinical and



- 1  
2  
3 534 Research Applications: Recommendations of the International RDC/TMD Consortium Network\*  
4 535 and Orofacial Pain Special Interest Group†'. *Journal of Oral & Facial Pain and Headache*, 28(1)  
5 536  
6 537 Smith SM, Dworkin RH, Turk DC, Baron R, Polydefkis M, Tracey I, et al. (2017). 'The potential  
7 538 role of sensory testing, skin biopsy, and functional brain imaging as biomarkers in chronic pain  
8 539 clinical trials: IMMFACT considerations'. *The Journal of Pain*,  
9 540  
10 541 Smith BH, Penny KI, Purves AM, et al. The Chronic Pain Grade questionnaire: validation and  
11 542 reliability in postal research. *Pain* 1997;71(2):141-7.  
12 543  
13 544 Van Oosterwijk J, Nijs J, Meeus M, Paul L. (2013). 'Evidence for central sensitization in chronic  
14 545 whiplash: a systematic literature review'. *European Journal of Pain*, 17:299-312.  
15 546  
16 547 Vase L, Petersen GL, Riley JL, 3rd, Price DD. (2009). 'Factors contributing to large analgesic  
17 548 effects in  
18 549 placebo mechanism studies conducted between 2002 and 2007'. *Pain*, 145:36-44  
19 550  
20 551 Velly, A., Schweinhardt, P., Friction, J. (2013). Comorbid conditions: How they affect orofacial  
21 552 pain. In *Treatment of TMDs: Bridging the Gap Between Advances in Research and Clinical Patient*  
22 553 *Management*, Greene, C.S., Laskin, D.M., eds. (Chicago: Quintessence) pp. 91-98  
23 554  
24 555 Von Korff M, Dworkin SF, Le Resche L, Kruger A. (1988). 'An epidemiologic comparison of  
25 556 pain complaints'. *Pain*, 32(2):173-83.  
26 557  
27 558 Von Korff, M. (2011). Assessment of chronic pain in epidemiological and health services  
28 559 research: Empirical bases and new directions. *Handbook of Pain Assessment*. D. C. Turk and R.  
29 560 Melzack. New York, Guilford Press: 455- 473.  
30 561  
31 562 Von Korff, M., et al. (1992). Grading the severity of chronic pain. *Pain* 50: 133-149.  
32 563  
33 564 Von Korff, M. R., et al. (1992). Research diagnostic criteria. Axis II: Pain-related disability and  
34 565 psychological status. In: S.F. Dworkin & L. LeResche (Eds.), *Research Diagnostic Criteria for*  
35 566 *Temporomandibular Disorders. Journal of Craniomandibular Disorders, Facial and Oral Pain*  
36 567 6: 330-334.  
37 568  
38 569 Wang W, Chair, S.Y., Thompson, D.R., Twinn, S.F. A Psychometric Evaluation of the Chinese  
39 570 Version of the Hospital Anxiety and Depression Scale in Patients with Coronary Heart  
40 571 Disease *Journal of Clinical Nursing* 2009;18:1908-15.  
41 572  
42 573 Wewers, M.E., Lowe, N.K. (1990) 'A critical review of visual analogue scales in the  
43 574 measurement of clinical phenomena'. *Res Nurs Health*, 13:227-236  
44 575  
45 576 Zigmond AS, Snaith RP. The hospital anxiety and depression scale. *Acta Psychiatr Scand*  
46 577 1983;67(6):361-70.  
47 578  
48 579

1  
2  
3  
4  
5  
6  
7  
8  
9  
10  
11  
12  
13  
14  
15  
16  
17  
18  
19  
20  
21  
22  
23  
24  
25  
26  
27  
28  
29  
30  
31  
32  
33  
34  
35  
36  
37  
38  
39  
40  
41  
42  
43  
44  
45  
46  
47  
48  
49  
50  
51  
52  
53  
54  
55  
56  
57  
58  
59  
60

580  
581

For peer review only



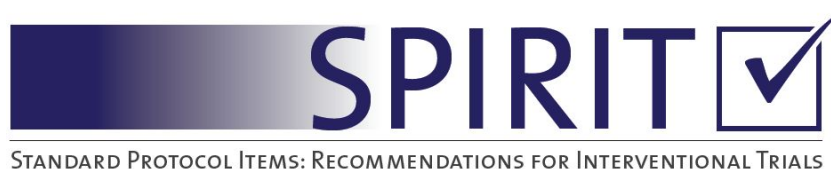

SPIRIT 2013 Checklist: Recommended items to address in a clinical trial protocol and related documents\*

| Section/item                      | Item No | Description                                                                                                                                                                                                                                                                                    |
|-----------------------------------|---------|------------------------------------------------------------------------------------------------------------------------------------------------------------------------------------------------------------------------------------------------------------------------------------------------|
| <b>Administrative information</b> |         |                                                                                                                                                                                                                                                                                                |
| Title                             | 1       | Descriptive title identifying the study design, population, interventions, and, if applicable, trial acronym – Page 1                                                                                                                                                                          |
| Trial registration                | 2a      | Trial identifier and registry name. If not yet registered, name of intended registry – N/A                                                                                                                                                                                                     |
|                                   | 2b      | All items from the World Health Organization Trial Registration Data Set – N/A                                                                                                                                                                                                                 |
| Protocol version                  | 3       | Date and version identifier – Page 1                                                                                                                                                                                                                                                           |
| Funding                           | 4       | Sources and types of financial, material, and other support – Page 22                                                                                                                                                                                                                          |
| Roles and responsibilities        | 5a      | Names, affiliations, and roles of protocol contributors – Pages 1 and 22                                                                                                                                                                                                                       |
|                                   | 5b      | Name and contact information for the trial sponsor – N/A                                                                                                                                                                                                                                       |
|                                   | 5c      | Role of study sponsor and funders, if any, in study design; collection, management, analysis, and interpretation of data; writing of the report; and the decision to submit the report for publication, including whether they will have ultimate authority over any of these activities – N/A |
|                                   | 5d      | Composition, roles, and responsibilities of the coordinating centre, steering committee, endpoint adjudication committee, data management team, and other individuals or groups overseeing the trial, if applicable (see Item 21a for data monitoring committee) – N/A                         |
| <b>Introduction</b>               |         |                                                                                                                                                                                                                                                                                                |
| Background and rationale          | 6a      | Description of research question and justification for undertaking the trial, including summary of relevant studies (published and unpublished) examining benefits and harms for each intervention – Pages 4-6                                                                                 |
|                                   | 6b      | Explanation for choice of comparators – Supplementary file                                                                                                                                                                                                                                     |
| Objectives                        | 7       | Specific objectives or hypotheses - Page 5-6                                                                                                                                                                                                                                                   |

1  
2 Trial design 8 Description of trial design including type of trial (eg, parallel group,  
3 crossover, factorial, single group), allocation ratio, and framework (eg,  
4 superiority, equivalence, noninferiority, exploratory) – N/A  
5  
6  
7

8 **Methods: Participants, interventions, and outcomes**  
9

10 Study setting 9 Description of study settings (eg, community clinic, academic hospital)  
11 and list of countries where data will be collected. Reference to where  
12 list of study sites can be obtained – Page 6  
13

14 Eligibility criteria 10 Inclusion and exclusion criteria for participants. If applicable, eligibility  
15 criteria for study centres and individuals who will perform the  
16 interventions (eg, surgeons, psychotherapists) – Pages 7  
17  
18

19 Interventions 11a Interventions for each group with sufficient detail to allow replication,  
20 including how and when they will be administered – Pages 8-9  
21

22 11b Criteria for discontinuing or modifying allocated interventions for a  
23 given trial participant (eg, drug dose change in response to harms,  
24 participant request, or improving/worsening disease) – Page 9  
25

26 11c Strategies to improve adherence to intervention protocols, and any  
27 procedures for monitoring adherence (eg, drug tablet return,  
28 laboratory tests) – N/A  
29

30 11d Relevant concomitant care and interventions that are permitted or  
31 prohibited during the trial – Pages 7 and 9  
32  
33

34 Outcomes 12 Primary, secondary, and other outcomes, including the specific  
35 measurement variable (eg, systolic blood pressure), analysis metric  
36 (eg, change from baseline, final value, time to event), method of  
37 aggregation (eg, median, proportion), and time point for each  
38 outcome. Explanation of the clinical relevance of chosen efficacy and  
39 harm outcomes is strongly recommended – Page 9 and 10 (primary  
40 outcome), Supplementary file (candidate predictors)  
41  
42

43 Participant 13 Time schedule of enrolment, interventions (including any run-ins and  
44 timeline washouts), assessments, and visits for participants. A schematic  
45 diagram is highly recommended (see Figure) – Pages 7-8  
46  
47

48 Sample size 14 Estimated number of participants needed to achieve study objectives  
49 and how it was determined, including clinical and statistical  
50 assumptions supporting any sample size calculations – Page 12  
51

52 Recruitment 15 Strategies for achieving adequate participant enrolment to reach  
53 target sample size – Pages 7  
54  
55

56 **Methods: Assignment of interventions (for controlled trials)**  
57

58 Allocation:  
59  
60

|    |                |     |                                                                         |
|----|----------------|-----|-------------------------------------------------------------------------|
| 1  |                |     |                                                                         |
| 2  | Sequence       | 16a | Method of generating the allocation sequence (eg, computer-             |
| 3  | generation     |     | generated random numbers), and list of any factors for stratification.  |
| 4  |                |     | To reduce predictability of a random sequence, details of any planned   |
| 5  |                |     | restriction (eg, blocking) should be provided in a separate document    |
| 6  |                |     | that is unavailable to those who enrol participants or assign           |
| 7  |                |     | interventions – N/A                                                     |
| 8  |                |     |                                                                         |
| 9  |                |     |                                                                         |
| 10 | Allocation     | 16b | Mechanism of implementing the allocation sequence (eg, central          |
| 11 | concealment    |     | telephone; sequentially numbered, opaque, sealed envelopes),            |
| 12 | mechanism      |     | describing any steps to conceal the sequence until interventions are    |
| 13 |                |     | assigned – N/A                                                          |
| 14 |                |     |                                                                         |
| 15 | Implementation | 16c | Who will generate the allocation sequence, who will enrol participants, |
| 16 |                |     | and who will assign participants to interventions – N/A                 |
| 17 |                |     |                                                                         |
| 18 |                |     |                                                                         |
| 19 | Blinding       | 17a | Who will be blinded after assignment to interventions (eg, trial        |
| 20 | (masking)      |     | participants, care providers, outcome assessors, data analysts), and    |
| 21 |                |     | how N/A                                                                 |
| 22 |                |     |                                                                         |
| 23 |                | 17b | If blinded, circumstances under which unblinding is permissible, and    |
| 24 |                |     | procedure for revealing a participant's allocated intervention during   |
| 25 |                |     | the trial – N/A                                                         |
| 26 |                |     |                                                                         |
| 27 |                |     |                                                                         |

### Methods: Data collection, management, and analysis

|    |                 |     |                                                                          |
|----|-----------------|-----|--------------------------------------------------------------------------|
| 28 |                 |     |                                                                          |
| 29 |                 |     |                                                                          |
| 30 | Data collection | 18a | Plans for assessment and collection of outcome, baseline, and other      |
| 31 | methods         |     | trial data, including any related processes to promote data quality (eg, |
| 32 |                 |     | duplicate measurements, training of assessors) and a description of      |
| 33 |                 |     | study instruments (eg, questionnaires, laboratory tests) along with      |
| 34 |                 |     | their reliability and validity, if known. Reference to where data        |
| 35 |                 |     | collection forms can be found, if not in the protocol – Pages 9-11,      |
| 36 |                 |     | Supplementary file                                                       |
| 37 |                 |     |                                                                          |
| 38 |                 |     |                                                                          |
| 39 |                 | 18b | Plans to promote participant retention and complete follow-up,           |
| 40 |                 |     | including list of any outcome data to be collected for participants who  |
| 41 |                 |     | discontinue or deviate from intervention protocols – Page 12-13          |
| 42 |                 |     | (withdrawals)                                                            |
| 43 |                 |     |                                                                          |
| 44 |                 |     |                                                                          |
| 45 | Data            | 19  | Plans for data entry, coding, security, and storage, including any       |
| 46 | management      |     | related processes to promote data quality (eg, double data entry;        |
| 47 |                 |     | range checks for data values). Reference to where details of data        |
| 48 |                 |     | management procedures can be found, if not in the protocol – Page        |
| 49 |                 |     | 12                                                                       |
| 50 |                 |     |                                                                          |
| 51 |                 |     |                                                                          |
| 52 | Statistical     | 20a | Statistical methods for analysing primary and secondary outcomes.        |
| 53 | methods         |     | Reference to where other details of the statistical analysis plan can be |
| 54 |                 |     | found, if not in the protocol – Page 12-13                               |
| 55 |                 |     |                                                                          |
| 56 |                 | 20b | Methods for any additional analyses (eg, subgroup and adjusted           |
| 57 |                 |     | analyses) – n/A                                                          |
| 58 |                 |     |                                                                          |
| 59 |                 |     |                                                                          |
| 60 |                 |     |                                                                          |

- 1  
2  
3  
4  
5  
6  
7  
8  
9  
10  
11  
12  
13  
14  
15  
16  
17  
18  
19  
20  
21  
22  
23  
24  
25  
26  
27  
28  
29  
30  
31  
32  
33  
34  
35  
36  
37  
38  
39  
40  
41  
42  
43  
44  
45  
46  
47  
48  
49  
50  
51  
52  
53  
54  
55  
56  
57  
58  
59  
60
- 20c Definition of analysis population relating to protocol non-adherence (eg, as randomised analysis), and any statistical methods to handle missing data (eg, multiple imputation) – Page 12

### Methods: Monitoring

- Data monitoring 21a Composition of data monitoring committee (DMC); summary of its role and reporting structure; statement of whether it is independent from the sponsor and competing interests; and reference to where further details about its charter can be found, if not in the protocol. Alternatively, an explanation of why a DMC is not needed – N/A
- 21b Description of any interim analyses and stopping guidelines, including who will have access to these interim results and make the final decision to terminate the trial – N/A
- Harms 22 Plans for collecting, assessing, reporting, and managing solicited and spontaneously reported adverse events and other unintended effects of trial interventions or trial conduct – Page 14
- Auditing 23 Frequency and procedures for auditing trial conduct, if any, and whether the process will be independent from investigators and the sponsor – N/A

### Ethics and dissemination

- Research ethics approval 24 Plans for seeking research ethics committee/institutional review board (REC/IRB) approval – Pages 6 and 14
- Protocol amendments 25 Plans for communicating important protocol modifications (eg, changes to eligibility criteria, outcomes, analyses) to relevant parties (eg, investigators, REC/IRBs, trial participants, trial registries, journals, regulators) – N/A
- Consent or assent 26a Who will obtain informed consent or assent from potential trial participants or authorised surrogates, and how (see Item 32) – Page 7
- 26b Additional consent provisions for collection and use of participant data and biological specimens in ancillary studies, if applicable – N/A
- Confidentiality 27 How personal information about potential and enrolled participants will be collected, shared, and maintained in order to protect confidentiality before, during, and after the trial – Page 12
- Declaration of interests 28 Financial and other competing interests for principal investigators for the overall trial and each study site – Page 22
- Access to data 29 Statement of who will have access to the final trial dataset, and disclosure of contractual agreements that limit such access for investigators – Not present
- Ancillary and post-trial care 30 Provisions, if any, for ancillary and post-trial care, and for compensation to those who suffer harm from trial participation – N/A

|                                                                                                                                                                                                                      |                         |     |                                                                                                                                                                                                                                                                                           |
|----------------------------------------------------------------------------------------------------------------------------------------------------------------------------------------------------------------------|-------------------------|-----|-------------------------------------------------------------------------------------------------------------------------------------------------------------------------------------------------------------------------------------------------------------------------------------------|
| 1<br>2<br>3<br>4<br>5<br>6<br>7<br>8<br>9<br>10<br>11<br>12<br>13<br>14<br>15                                                                                                                                        | Dissemination<br>policy | 31a | Plans for investigators and sponsor to communicate trial results to participants, healthcare professionals, the public, and other relevant groups (eg, via publication, reporting in results databases, or other data sharing arrangements), including any publication restrictions – N/A |
| 16<br>17<br>18<br>19<br>20<br>21<br>22<br>23<br>24                                                                                                                                                                   |                         | 31b | Authorship eligibility guidelines and any intended use of professional writers – N/A                                                                                                                                                                                                      |
| 25<br>26<br>27<br>28<br>29<br>30<br>31<br>32<br>33<br>34<br>35<br>36<br>37<br>38<br>39<br>40<br>41<br>42<br>43<br>44<br>45<br>46<br>47<br>48<br>49<br>50<br>51<br>52<br>53<br>54<br>55<br>56<br>57<br>58<br>59<br>60 |                         | 31c | Plans, if any, for granting public access to the full protocol, participant-level dataset, and statistical code – N/A                                                                                                                                                                     |

## Appendices

|                                                                                                                                                                                                                      |                               |    |                                                                                                                                                                                                      |
|----------------------------------------------------------------------------------------------------------------------------------------------------------------------------------------------------------------------|-------------------------------|----|------------------------------------------------------------------------------------------------------------------------------------------------------------------------------------------------------|
| 17<br>18<br>19<br>20<br>21<br>22<br>23<br>24                                                                                                                                                                         | Informed consent<br>materials | 32 | Model consent form and other related documentation given to participants and authorised surrogates – N/A                                                                                             |
| 25<br>26<br>27<br>28<br>29<br>30<br>31<br>32<br>33<br>34<br>35<br>36<br>37<br>38<br>39<br>40<br>41<br>42<br>43<br>44<br>45<br>46<br>47<br>48<br>49<br>50<br>51<br>52<br>53<br>54<br>55<br>56<br>57<br>58<br>59<br>60 | Biological<br>specimens       | 33 | Plans for collection, laboratory evaluation, and storage of biological specimens for genetic or molecular analysis in the current trial and for future use in ancillary studies, if applicable – N/A |

---

\*It is strongly recommended that this checklist be read in conjunction with the SPIRIT 2013 Explanation & Elaboration for important clarification on the items. Amendments to the protocol should be tracked and dated. The SPIRIT checklist is copyrighted by the SPIRIT Group under the Creative Commons "[Attribution-NonCommercial-NoDerivs 3.0 Unported](https://creativecommons.org/licenses/by-nc-nd/3.0/)" license.

# BMJ Open

## PREDICTORS OF PAIN REDUCTION FOLLOWING MANUAL THERAPY IN PATIENTS WITH TEMPOROMANDIBULAR DISORDERS: A PROTOCOL FOR A PROSPECTIVE OBSERVATIONAL STUDY

|                                 |                                                                                                                                                                                                                                                                                                                                                                                                                                                                                                                                                                                                                         |
|---------------------------------|-------------------------------------------------------------------------------------------------------------------------------------------------------------------------------------------------------------------------------------------------------------------------------------------------------------------------------------------------------------------------------------------------------------------------------------------------------------------------------------------------------------------------------------------------------------------------------------------------------------------------|
| Journal:                        | <i>BMJ Open</i>                                                                                                                                                                                                                                                                                                                                                                                                                                                                                                                                                                                                         |
| Manuscript ID                   | bmjopen-2019-032113.R1                                                                                                                                                                                                                                                                                                                                                                                                                                                                                                                                                                                                  |
| Article Type:                   | Protocol                                                                                                                                                                                                                                                                                                                                                                                                                                                                                                                                                                                                                |
| Date Submitted by the Author:   | 10-Oct-2019                                                                                                                                                                                                                                                                                                                                                                                                                                                                                                                                                                                                             |
| Complete List of Authors:       | Asquini, Giacomo; University of Birmingham, School of Sport, Exercise and Rehabilitation Sciences<br>Edoardo Bianchi , Andrea ; Italian Stomatologic Institute<br>Heneghan, Nicola; University of Birmingham, School of Sport, Exercise and Rehabilitation Sciences<br>Rushton, Alison; niversity of Birmingham, School of Health and Population Sciences, College of Medical and Dental Sciences<br>Borromeo, Giulia; Italian Stomatologic Institute<br>Locatelli , Matteo; IRCCS San Raffaele Scientific Institute<br>Falla, Deborah; University of Birmingham, School of Sport, Exercise and Rehabilitation Sciences |
| <b>Primary Subject Heading</b>: | Rehabilitation medicine                                                                                                                                                                                                                                                                                                                                                                                                                                                                                                                                                                                                 |
| Secondary Subject Heading:      | Dentistry and oral medicine                                                                                                                                                                                                                                                                                                                                                                                                                                                                                                                                                                                             |
| Keywords:                       | Temporomandibular Disorders, Temporomandibular Joint Dysfunction Syndrome, Pain, Prediction, Manual Therapy                                                                                                                                                                                                                                                                                                                                                                                                                                                                                                             |
|                                 |                                                                                                                                                                                                                                                                                                                                                                                                                                                                                                                                                                                                                         |

SCHOLARONE™  
Manuscripts

1  
2  
3  
4  
5  
6  
7  
8  
9  
10  
11  
12  
13  
14  
15  
16  
17  
18  
19  
20  
21  
22  
23  
24  
25  
26  
27  
28  
29  
30  
31  
32  
33  
34  
35  
36  
37  
38  
39  
40  
41  
42  
43  
44  
45  
46  
47  
48  
49  
50  
51  
52  
53  
54  
55  
56  
57  
58  
59  
60

**PREDICTORS OF PAIN REDUCTION FOLLOWING MANUAL THERAPY IN  
PATIENTS WITH TEMPOROMANDIBULAR DISORDERS:  
A PROTOCOL FOR A PROSPECTIVE OBSERVATIONAL STUDY**

Asquini G<sup>1,2</sup>, Edoardo Bianchi A<sup>2</sup>, Heneghan N<sup>1</sup>, Rushton A<sup>1</sup>, Borromeo G<sup>2</sup>, Locatelli M<sup>3</sup>,  
Falla D<sup>1</sup>

**Affiliations**

<sup>1</sup> Centre of Precision Rehabilitation for Spinal Pain (CPR Spine)  
School of Sport, Exercise and Rehabilitation Sciences  
College of Life and Environmental Sciences  
University of Birmingham  
Birmingham B15 2TT  
United Kingdom

<sup>2</sup> Italian Stomatologic Institute  
Cranio-mandibular Physiotherapy Service  
Via Pace 21, 20122 Milan  
Italy

<sup>3</sup> IRCCS San Raffaele Scientific Institute  
Via Olgettina Milano 60,  
20132 Milano,  
Italy

**Corresponding author:**

Deborah Falla

Centre of Precision Rehabilitation for Spinal Pain (CPR Spine)

School of Sport, Exercise and Rehabilitation Sciences

College of Life and Environmental Sciences

University of Birmingham

Birmingham, UK

E-mail: d.falla@bham.ac.uk



## ABSTRACT

### Introduction

Temporomandibular Disorders (TMD) are principally characterised by pain in the craniomandibular area and probable limitations of jaw opening. Manual therapy, like other recommended conservative treatments included in clinical guidelines, is commonly used to treat patients with TMD to reduce pain and improve function. However, outcomes may be variable. The aim of this study is to identify predictors associated with pain reduction in patients with TMD following manual therapy by analysing a combination of patient-reported outcome measures and clinical tests. Such knowledge will support a more personalised management approach by facilitating clinical decision-making.

### Methods/analysis

An observational prospective design will recruit a cohort of 100 adults with a diagnosis of TMD (according to Axis I of the Diagnostic Criteria for TMD) at a Dental Hospital in Italy. Patients will be treated with four weekly sessions of manual therapy applied to craniomandibular structures. An array of predictors has been chosen based on previous research on prognostic factors for TMD and altered pain modulation in musculoskeletal disorders. Candidate predictors including demographic variables, general health variables, psychosocial features, TMD characteristics, and clinical tests of the temporomandibular joint and masticatory muscles will be collected at baseline. Definition of good outcome is a clinically significant reduction of pain intensity over the last week ( $\geq 30\%$  reduction Visual Analogue Scale) immediately following the 4-week intervention. Exploratory factor analysis will be applied to analyse factor loading of candidate predictors for good outcome at 4 weeks. Subsequently, a logistic multivariable regression model will be performed to calculate low and high risk of good outcome.

### **Ethics and dissemination**

Ethical approval will be obtained from the “Fondazione IRCCS Ca’ Granda Ospedale Maggiore Policlinico” and University of Birmingham Ethics Committee. The results will be submitted for publication in a peer-reviewed journal and presented at conferences.

Keywords: Temporomandibular Disorders, Temporomandibular Joint Dysfunction Syndrome, Pain, Prediction, Manual Therapy

Word count: 3129 [excluding references]

### **STRENGTHS AND LIMITATIONS OF THIS STUDY**

- This will be the first study to identify predictors associated with pain reduction following manual therapy interventions in patients with TMD
- The study will utilise a comprehensive array of candidate factors to predict clinically relevant pain reduction
- The implications from this study will facilitate clinical decision-making for manual therapists managing patients with TMD
- Alternative or additional predictors could be valuable to include but the candidate predictors have been prioritised as they are reliable and valid measures which have a relationship with pain
- The study could potentially generate a non-representative sample of patients as it will exclude people who have already received recent treatment for their TMD

## INTRODUCTION

Temporomandibular Disorders (TMD) affect approximately 10% of the adult population and, in the USA alone, are estimated to cost US\$4 billion per year on management<sup>1-2</sup>. In Spain, the incidence of TMD has significantly increased (from 8% in 1993 to 14% in 2015) despite a clear improvement in general oral health over the entire period<sup>3</sup>. Although some countries report less prevalence of TMD such as in Sweden (approximately 5%)<sup>4</sup>, TMD remains a public health-related challenge. TMD are principally characterised by pain and limitations of jaw opening<sup>5</sup> but many patients also complain of neck and back pain or pain at other sites<sup>6</sup>.

Physical therapy is one of the most common conservative interventions for the management of TMD<sup>7</sup> and given that the aetiology may be unclear<sup>8</sup>, several therapeutic approaches have been described<sup>9</sup>. One approach is manual therapy applied to the craniomandibular structures with evidence suggesting a significant reduction in pain with manual therapy treatment<sup>10</sup>, although responses are highly variable<sup>11</sup>. In other musculoskeletal pain disorders, such as neck or back pain, pain reduction from manual therapy has been shown to be superior to other treatments (e.g. therapeutic exercise) when targeted towards patients with specific clinical features including the onset of symptoms within 30 days<sup>12-13</sup>. Nevertheless, in TMD, no previous study has investigated patient factors associated with significant pain reduction following manual therapy. Such knowledge could be achieved by identifying potential predictors (e.g. pain characteristics, psychosocial features, TMD characteristics) of pain reduction following manual therapy interventions in patients with TMD to support a more personalised management approach.

Very few studies have examined factors associated with pain reduction in patients with TMD. Forssell et al. conducted a prospective cohort study with 263 primary care

1  
2  
3 patients with TMD pain<sup>14</sup>. They analysed several potential predictors of persistent pain at  
4  
5 one-year follow-up including demographic, pain-related and psychosocial variables. It was  
6  
7 concluded that patients with TMD who have had numerous previous healthcare visits,  
8  
9 complained of high-intensity pain at other body sites and had a greater number of disability  
10  
11 days, were at greater risk of having pain one year after the initial assessment. Nevertheless,  
12  
13 this study did not examine predictors of pain reduction related to a therapeutic intervention  
14  
15 which could be useful to inform clinical practice. Kapos et al. investigated the association of  
16  
17 long-term pain intensity with baseline health-related quality of life and jaw functional  
18  
19 limitation in patients with TMD<sup>15</sup>. Findings suggested that baseline health-related quality of  
20  
21 life is inversely proportional with pain intensity at an eight-year follow-up regardless of the  
22  
23 type of treatment that they received (e.g. surgery, drugs, physical therapy or unconventional  
24  
25 therapy). After adjusting for the type of treatments received, by clustering the participants  
26  
27 into three groups (medical/conventional management, alternative medicine, and surgical  
28  
29 intervention), each predictor analysed (demographic, pain-related and health-related quality  
30  
31 of life) maintained similar statistical significance. Notwithstanding, the group classified as  
32  
33 “medical/ conventional management” included participants receiving diverse treatments  
34  
35 ranging from physical therapy, pharmacology (Acetaminophen, Antidepressants, Anti-  
36  
37 inflammatory) to the application of a mouth appliance (e.g. Michigan splint). This previous  
38  
39 work can facilitate clinicians to identify patients who are more challenging to treat by  
40  
41 identifying clinical features associated with persistent pain in the long term regardless of the  
42  
43 type of interventions applied. However, currently no study has examined predictive factors  
44  
45 associated with pain reduction following manual therapy interventions in patients with TMD.  
46  
47  
48  
49  
50  
51  
52  
53

54 The aim of this study is to identify predictors associated with pain reduction in  
55  
56 patients with TMD following manual therapy applied to craniomandibular structures by  
57  
58 analysing a combination of: (1) demographical variables, (2) general health variables, (3)  
59  
60

1  
2  
3 psychosocial features, (4) TMD characteristics, and (5) clinical tests of the  
4  
5 temporomandibular joint and masticatory muscles. The knowledge gained from this study  
6  
7 will facilitate clinical decision-making for manual therapists managing patients with TMD by  
8  
9 providing clinicians with key factors to evaluate, to determine whether or not the patient is  
10  
11 likely to have a clinically relevant reduction in their pain immediately following four weekly  
12  
13 applications of manual therapy.  
14  
15  
16  
17  
18

## 19 **METHODS AND ANALYSIS**

### 21 **Source of data**

22  
23  
24  
25 A prospective observational study will recruit a cohort of patients referred to the  
26  
27 Italian Stomatologic Institute with a TMD diagnosis according to the Axis I of the Diagnostic  
28  
29 Criteria for TMDs (DC/TMD)<sup>16</sup>. This protocol is written according to the Transparent  
30  
31 Reporting of a multivariable prediction model for Individual Prognosis or Diagnosis  
32  
33 (TRIPOD) statement<sup>17</sup> in which recommendations are provided about prediction model  
34  
35 development and validation. Ethical clearance will be obtained from the Ethics Committee of  
36  
37 the Fondazione IRCCS Ca' Granda Ospedale Maggiore Policlinico, and the University of  
38  
39 Birmingham Ethics Committee, and the study will be conducted in accordance with the  
40  
41 Declaration of Helsinki.  
42  
43  
44  
45  
46

47 Patient reported and physical assessment data will be collected at baseline prior to  
48  
49 commencing treatment. Outcome will be collected at the end of the fourth session of  
50  
51 craniomandibular manual therapy (at one month). This timeline has been selected based on  
52  
53 previous studies investigating 1) the effects of manual therapy on pain<sup>18-19</sup>; and 2) work  
54  
55 confirming the effectiveness of manual therapy for TMD patients<sup>20</sup> and is believed to be  
56  
57 reasonable for the purposes of this study.  
58  
59  
60

## Setting and Participants

Participant recruitment will be carried out at the TMJ Unit of the Italian Stomatological Institute (Dental Hospital) in Milan, Italy over a period of up to 12 months (planned start date July 2019). Consecutive eligible participants will be approached for recruitment until the sample size is reached.

### *Eligibility criteria*

Inclusion criteria: (1) adults aged  $\geq 18$  years; (2) TMD diagnosis according to the Diagnostic Criteria for TMDs (DC/TMD)<sup>16</sup>; (3) no therapeutic interventions reported (for their TMD) in the past six months<sup>21</sup>; (4) capacity to use and understand written and verbal Italian language; (5) mental capacity to provide informed consent.

Exclusion criteria: (1) TMD pain related to rheumatoid/inflammatory arthritis (2) any physical (e.g. facial paralysis, neurological disorders, neuropathic pain) or mental condition (e.g. cognitive deficit, mental illness and/or disorders) that could potentially influence the study results. Additionally, patients will be excluded if (3) they commence another treatment for their TMD (pharmacology, oral appliance, others) throughout the duration of the study.

## Recruitment

Based on feasibility data from the last 5 years of activity at the TMJ Unit of Italian Stomatologic Institute, it is estimated that at least 130 eligible participants will be available for recruitment over 13 months. According to previous observational studies on the prediction of outcomes in musculoskeletal disorders<sup>12-13</sup>, it is estimated that 75% of eligible participants will consent to participation [100 participants].

All patients attending the TMJ Unit will be screened for the presence of a TMD. One expert dentist with >10 years' experience in the management of patients with TMD, will confirm the TMD diagnosis according to the DC/TMD using the Italian translation of the

1  
2  
3 protocol<sup>22</sup>. Subsequently, in accordance with the inclusion/exclusion criteria, he will explain  
4 the study to the potential participant and provide the patient information sheet. Participants  
5 will then give their written informed consent prior to inclusion in the study. Afterwards, the  
6 participant will be referred to see a physiotherapist [independent assessor, >5 years'  
7 experience in managing patients with TMD] for the baseline assessments (summarised in  
8 Table 1) and then treatment will commence within the same week. After the last session (i.e.  
9 one month from baseline), the participants will be assessed again by the assessing  
10 physiotherapist to measure outcome. Participant flow through the study is outlined in Figure  
11  
12  
13  
14  
15  
16  
17  
18  
19  
20  
21  
22 1.

23  
24  
25  
26 [FIGURE 1]  
27  
28  
29

### 30 **Treatment**

31  
32  
33 Participants will receive four sessions of manual therapy applied to craniomandibular  
34 structures over 4 weeks<sup>23-25</sup>. Two physiotherapists, each with >5 years' experience in manual  
35 therapy / TMD will perform the treatments. They will not be involved in participant  
36 recruitment, assessment or the collection of the outcome measure. Manual therapy techniques  
37 will be based on the clinical examination, and will be selected at the discretion of the treating  
38 physiotherapist according to their clinical reasoning of the individual case. Overall, the  
39 application of manual therapy aims to decrease pain by treating masticatory muscle trigger  
40 points, muscle tightness, and restricted temporomandibular joint movements. Several  
41 techniques will be considered including: (i) ventral and caudal anterior glide  
42 temporomandibular joint mobilization<sup>26</sup>; (ii) soft tissue interventions for the management of  
43 trigger points in masticatory muscles<sup>27</sup>; (iii) myofascial induction therapy [functional  
44 restoration of the fascial system] applied to craniomandibular structures<sup>28</sup>.  
45  
46  
47  
48  
49  
50  
51  
52  
53  
54  
55  
56  
57  
58  
59  
60



1  
2  
3 The structures targeted in the treatment sessions will be the temporomandibular joint,  
4 temporal muscles, masseter muscles, medial and lateral pterygoid muscles and suprahyoid  
5 muscles, applied at the discretion of the physiotherapist based on the patient's individual  
6 presentation. During the treatment sessions, the treating physiotherapists will provide  
7 explanations about the patient's condition and answer any participant questions by promoting  
8 general advice. The treatment sessions will last from 20 to 30 minutes duration. No other  
9 treatment (e.g. oral appliance) will be performed for the management of their TMD. If during  
10 the course of the four-week intervention, a patient seeks treatment for an acute episode of  
11 pain at another site (e.g. neck pain, low back pain, shoulder pain) they will be withdrawn  
12 from the study.  
13  
14  
15  
16  
17  
18  
19  
20  
21  
22  
23  
24  
25  
26  
27

## 28 **Outcome**

29  
30 The outcome being predicted by the prediction model is pain intensity since patients  
31 with TMD typically report pain to be their primary problem<sup>5</sup>, manual therapy is largely  
32 known to be effective principally for pain modulation<sup>29</sup> and change in pain intensity has most  
33 commonly been the primary outcome of choice in several other studies of patients with  
34 TMD<sup>30-33</sup>.  
35  
36  
37  
38  
39  
40  
41

42 Pain intensity will be calculated by averaging the ratings of current pain, average pain  
43 in the past week, and worst pain in the past week using the Visual Analogue Scale (VAS),  
44 consisting of a horizontal line measuring 10 cm (without marks), with "no pain" written at the  
45 left extremity, and "worst pain imaginable" at the right extremity<sup>34</sup>. The VAS is a reliable and  
46 valid scale to assess pain intensity as an outcome measure in intervention studies<sup>35</sup>. Based on  
47 the Initiative on Methods, Measurement, and Pain Assessment in Clinical Trials (IMMPACT)  
48 recommendations about TMD reviewed by Haythornthwaite<sup>36</sup>, a reduction of at least 30% of  
49 the VAS score for pain intensity is considered clinically significant. Consequently, a  
50  
51  
52  
53  
54  
55  
56  
57  
58  
59  
60

reduction in the total VAS score [ $\geq 30\%$ ] will be defined as a good outcome. The outcome measure will be evaluated by the same independent assessor to minimise detection bias<sup>37</sup>.

To capture a potential change in function which may occur with a change in pain intensity, patients will also complete the patient specific functional scale [PSFS]<sup>38</sup> pre and post treatment. The PSFS is a self-reported outcome measure assessing functional change in patients with musculoskeletal disorders<sup>39-40</sup>. It is responsive to clinically significant change over time<sup>41</sup>. Patients will be invited to rate, on an 11-point scale, their level of difficulty performing at least three different daily activities. Following the treatment, patients will be required to score again the activities previously rated. The PSFS is a valid, reliable, and responsive outcome measure with a high test-retest reliability in different musculoskeletal disorders such as low back and neck pain<sup>42-44</sup>.

### Candidate predictors

The candidate predictors that have been chosen are reliable and valid measures which have a relationship with pain. The selection is based on previous research on prognostic factors for TMD and altered pain modulation in musculoskeletal disorders<sup>45-46</sup>. Candidate predictors are summarised in Table 1, with further detail in Supplementary file S1. All data collection will be standardised through protocols and clinical report forms.

**Table 1: Summary of candidate predictors.**

| Domain / Candidate predictor   | Measure / data item                                                    |
|--------------------------------|------------------------------------------------------------------------|
| <b>Demographical variables</b> |                                                                        |
| Age                            | Years                                                                  |
| Gender                         | Female / male                                                          |
| Education                      | Basic education, intermediate education and university-level education |

| <b>General health variables</b>                       |                                                                                                                                                                                                                                                                                                                                          |
|-------------------------------------------------------|------------------------------------------------------------------------------------------------------------------------------------------------------------------------------------------------------------------------------------------------------------------------------------------------------------------------------------------|
| Health-related quality of life                        | EuroQol EQ-5D-5L <sup>47</sup>                                                                                                                                                                                                                                                                                                           |
| Sleep quality                                         | 11-point [0-10] Numerical Rating Scales, relating to current pain, from 'best possible sleep' to 'worst possible sleep' <sup>48</sup>                                                                                                                                                                                                    |
| <b>Psychosocial features</b>                          |                                                                                                                                                                                                                                                                                                                                          |
| Coping strategies applied during a painful experience | Coping Strategies Questionnaire 27 [CSQ-27] <sup>49</sup>                                                                                                                                                                                                                                                                                |
| Anxiety and depression                                | Hospital Anxiety and Depression Scales [HADS] <sup>50</sup>                                                                                                                                                                                                                                                                              |
| Treatment expectation                                 | Positive / negative expectation <sup>51</sup>                                                                                                                                                                                                                                                                                            |
| <b>TMD characteristics</b>                            |                                                                                                                                                                                                                                                                                                                                          |
| Pain duration                                         | Days                                                                                                                                                                                                                                                                                                                                     |
| Pain intensity                                        | VAS: averaging ratings of current pain, average pain, and worst pain in the past week <sup>52</sup>                                                                                                                                                                                                                                      |
| Pain location                                         | Pain drawing as described in the protocol of Diagnostic Criteria for TMD (DC/TMD) <sup>16</sup>                                                                                                                                                                                                                                          |
| Central sensitization                                 | Central Sensitization Inventory (CS) <sup>53</sup>                                                                                                                                                                                                                                                                                       |
| Classification of TMD                                 | In according to DC/TMD Taxonomy <sup>54</sup>                                                                                                                                                                                                                                                                                            |
| Oral Behaviours                                       | Oral Behaviours Checklist [OBC] <sup>55</sup>                                                                                                                                                                                                                                                                                            |
| Characteristic pain intensity and disability          | Graded Chronic Pain Scale (GCPS) version 2.0 [Italian version - <a href="http://www.rdc-tmdinternational.org">www.rdc-tmdinternational.org</a> ]                                                                                                                                                                                         |
| <b>TMJ and masticatory muscles clinical test</b>      |                                                                                                                                                                                                                                                                                                                                          |
| TMJ range of motion                                   | Maximal Mouth Opening (MMO) without pain measured in mm through a ruler as described in the DC/TMD protocol <sup>16</sup>                                                                                                                                                                                                                |
| TMJ palpation pain                                    | Dynamic TMJ lateral pole palpation [1 kg of palpation pressure] in according to DC/TMD protocol <sup>16</sup><br>Score range: 0-1 [no pain =0; pain = 1]                                                                                                                                                                                 |
| Muscle palpation pain                                 | Palpation in the following 6 bilateral points: lateral pterygoid area [0.5 kg intraoral palpation], temporalis tendon [0.5 kg intraoral palpation], masseter muscle [1 kg extraoral palpation] as described in the DC/TMD protocol <sup>16</sup> . Score range: 0–1 [< 3 sites with familiar pain = 0; ≥ 3 sites with familiar pain = 1] |
| JAw-test                                              | Immediate effects of brief intraoral MT techniques on pain [VRS] and TMJ range of motion [MMO]. A standardised procedure is fully described in Supplementary file S1.<br>Score range 0-2: [0 = no change; 1 = pain improvement or MMO improvement; 2 = improvement of both]                                                              |

## Data handling

Candidate predictors will be collected by independent physiotherapist assessor. All data will be confidentially secured by storing it on a password-protected computer attainable only by the principal investigators (GA). All individual details will be replaced with ID codes. At the end of the data collection, all data stored on the principal investigator's computer will be transferred securely to a server at the Centre of Precision Rehabilitation for Spinal Pain at Birmingham University where the data will be analysed. All data will be stored on a secure server at the University of Birmingham for a period of 10-years in line with Research Governance procedures. Data will be analysed using IBM SPSS Statistics (Version 25, IBM).

## Sample Size

Exploratory factor analysis will be utilised to reduce the number of predictors<sup>56</sup>. This method will guarantee an adequate sample size (at least 10 cases per candidate predictor) to power the final regression analysis<sup>57-58</sup>. Data will be collected for a sample size of 100 participants so that, considering 10% of potential drops out, final data are available for 90 participants.

## Statistical analysis methods

A flow diagram will report eligible participants, examined for eligibility, confirmed eligible, recruited into the study, completed follow-up and analysed. Reasons for non-participation, exclusion, drop-outs and withdrawal will be fully documented and all missing data of participants will be reported. Participant characteristics (candidate predictors - Table 1) will be summarised with a descriptive method.

A primary phase of the exploratory data analysis will summarise data to implement the predictive model<sup>59</sup>. Multicollinearity between candidate predictors will be assessed at baseline. Outcome [VAS pain intensity] will be split into good versus poor as described previously [good outcome: reduction in VAS score  $\geq 30\%$ ]<sup>36</sup>. Exploratory factor analysis will be applied to

1  
2  
3 analyse factor loading of candidate predictors (summary scores) on good outcome at one  
4 month. This process will reduce candidate predictors (supported by the cohort sample of 90) to  
5 enter into the final model.  
6  
7  
8  
9

10 The statistical model has been designed a priori. To investigate the impact of each  
11 predictive factor on good outcome, a logistic multivariable regression model will be performed.  
12 For each candidate predictor, the mean differences or the odds ratio with their 95% confidence  
13 intervals will be calculated. A multiple imputation analysis<sup>60</sup> will be applied to manage possible  
14 missing data. The multivariable analysis will initially consider all candidate predictors. In the  
15 case of a high correlation between candidate predictors, a reduced multivariate analysis will be  
16 considered.  
17  
18  
19  
20  
21  
22  
23  
24  
25  
26  
27

## 28 **DISCUSSION**

29  
30 There is a need to identify predictors for pain reduction in patients with TMD following  
31 specific treatments in order to inform clinical decision-making. Several therapies are described  
32 for patients with TMD such as the use of oral appliances, different types of physical therapy  
33 modalities, pharmacology or temporomandibular joint arthrocentesis yet the amount of pain  
34 relief that different people receive from each intervention is variable<sup>7,10</sup>. As shown by Forssell  
35 et al.<sup>14</sup> and Kapos et al.<sup>15</sup>, many patients continue to experience pain following such  
36 interventions. Investigating factors associated with pain relief to such treatments can facilitate  
37 clinical assessment and treatment selection.  
38  
39  
40  
41  
42  
43  
44  
45  
46  
47  
48

49 Physical therapy is one of the most common conservative interventions to treat TMD<sup>7</sup>.  
50 Among different physical therapy modalities, manual therapy can provide symptom and  
51 functional improvements<sup>10</sup> including pain relief<sup>11,31</sup>. Knowledge of predictive factors  
52 associated with good outcome to a specific intervention such as manual therapy applied to  
53  
54  
55  
56  
57  
58  
59  
60

1  
2  
3 craniomandibular structures will facilitate clinical decision making. Ultimately, such  
4  
5 knowledge will lead to improved clinical and cost effectiveness of rehabilitation approaches.  
6  
7

### 8 **Quality assurance**

9  
10 Only participants that have not received therapeutic intervention for their TMD in the  
11  
12 past six months will be included in the current study. It is possible that such eligibility criteria  
13  
14 could generate selection bias. To address this potential bias, the number of eligible and included  
15  
16 subjects with the reason for non-participation will be documented.  
17  
18

### 19 **Patient and Public Involvement**

20  
21 The research question in this study was developed following consultations and  
22  
23 discussion with patients. Patients will not be involved in the analysis and data collection but  
24  
25 will contribute to data interpretation and production of a lay summary of the findings.  
26  
27

### 28 **Ethics and Dissemination**

29  
30 The research protocol has been submitted to the Ethics Committee of the “Fondazione  
31  
32 IRCCS Ca’ Granda Ospedale Maggiore Policlinico” and subsequently will be submitted to the  
33  
34 University of Birmingham Ethics Committee for approval. Researchers will inform all  
35  
36 participants on the characteristics of the research and will obtain written consent. Participants  
37  
38 will be informed that they are free to withdraw from the study at any time, without needing to  
39  
40 provide reason. Any concerns for a participant by the study team will be fed back to the primary  
41  
42 investigator (GA). Baseline characteristics of withdrawn participants will be compared to those  
43  
44 of retained participants to assess for any differences. In the event of any unlikely adverse  
45  
46 events, this will be immediately reported by the principal investigator to the ethics committee.  
47  
48  
49

50  
51 The results of this study will submitted for publication in a peer review journal and  
52  
53 presented at conferences.  
54  
55  
56  
57

### 58 **Limitations**

1  
2  
3 The study could potentially generate a non-representative sample of patients with TMD  
4  
5 due to a possible selection bias. Subjects reporting other treatments before [6 months] and  
6  
7 during the study will be excluded to minimise confounding bias and preserve internal validity.  
8  
9  
10 This could potentially generate a non representative sample of TMDs because of exclusion of  
11  
12 patients with high levels of pain which seek additional treatment. This potential event,  
13  
14 associated with the fact that this observational study will be performed at a single site only,  
15  
16 could reduce the external validity and the generalisability of the results.  
17  
18

### 19 **Conclusion**

20  
21 This will be the first study to identify factors associated with pain reduction following  
22  
23 manual therapy in patients with TMD and the knowledge gained from this study stands to  
24  
25 facilitate clinical decision making for manual therapists managing patients with TMD.  
26  
27  
28  
29  
30  
31  
32  
33  
34  
35  
36  
37  
38  
39  
40  
41  
42  
43  
44  
45  
46  
47  
48  
49  
50  
51  
52  
53  
54  
55  
56  
57  
58  
59  
60



## REFERENCES

1. Lipton JA, Ship JA, Larach-Robinson D. Estimated prevalence and distribution of reported orofacial pain in United States. *J Am Dent Assoc.* 1993;124:115-112.
2. NIDCR. Facial Pain (2014). *National Institute of Health* [Online]. <http://www.nidcr.nih.gov/DataStatistics/FindDataByTopic/FacialPain/> [Accessed Dec 28 2018]
3. Adèrn B, Minston A, Nohlert E, Tegelberg Å. Self-reportance of temporomandibular disorders in adult patients attending general dental practice in Sweden from 2011 to 2013. *Acta Odontol Scand.* 2018;76(7):530-534.
4. Montero J, Llodra JC, Bravo M. Prevalence of the Signs and Symptoms of Temporomandibular Disorders Among Spanish Adults and Seniors According to Five National Surveys Performed Between 1993 and 2015. *J Oral Facial Pain Headache.* 2018;32(4):349-357.
5. De Leeuw R, Klasser GD. *Orofacial pain guidelines for assessment, diagnosis, and management.* 5th ed. Hanover park, II: Quintessence publishing; 2013.
6. Plesh O, Adams SH, Gansky SA. Temporomandibular joint and muscle disorders-type pain and comorbid pains in a national US sample. *J Orofacial Pain.* 2011;25: 190-198.
7. Calixtre LB, Grüniger BL, Haik MN, Albuquerque-Sendin F, Oliveira AB. Effects of cervical mobilization and exercise on pain, movement and function in subjects with temporomandibular disorders: a single group pre-post test. *Journal of Applied Oral Science.* 2016;24(3):188–197.
8. Slade GD, Bair E, Greenspan JD, Dubner R, Fillingim RB, Diatchenko L, Maixner W, Knott C, Ohrbach R. Signs and symptoms of first-onset TMD and sociodemographic predictors of its development: the OPPERA prospective cohort study. *J Pain.* 2013;14:T20-T32
9. Coskun Benlidayi I, Salimov F, Kurkcu M, Guzel R. Kinesio-Taping for temporomandibular Disorders: Single-blind, randomized, controlled trial of effectiveness. *J Back Musculoskeletal Rehabil.* 2016; 29:373-380.
10. Armijo-Olivo S, Pitance L, Singh V, Neto F, Thie N, Michelotti A. Effectiveness of Manual Therapy and Therapeutic Exercise for Temporomandibular Disorders: Systematic Review and Meta-Analysis. *Physical Therapy.* 2016; 96(1): 9–25.
11. Kalamir A, Graham PL, Vitiello AL, Bonello R, Pollard H. Intra-oral myofascial therapy versus education and self-care in the treatment of chronic, myogenous temporomandibular disorder: A randomised, clinical trial. *Chiropractic and Manual Therapies.* 2013; 21(1):17.
12. Cleland JA, Childs JD, Fritz JM, Whitman JM, Eberhart SL. Development of a Clinical Prediction Rule for Guiding Treatment of a Subgroup of Patients With Neck Pain: Use of Thoracic Spine Manipulation, Exercise, and Patient Education. *Physical Therapy.* 2007; 87(1): 9–23.

13. Flynn T, Fritz J, Whitman J, Wainner R, Magel J, Rendeiro D, Butler B, Garber M, Allison S. A clinical prediction rule for classifying patients with low back pain who demonstrate short-term improvement with spinal manipulation. *Spine*; 2002; 27(24):2835-2843.
14. Forssell H, Kauko T, Kotiranta U, Suvinen T. Predictors for future clinically significant pain in patients with temporomandibular disorder: A prospective cohort study. *European Journal of Pain*. 2017; 21(1):188–197.
15. Kapos FP, Look JO, Zhang L, Hodges JS, Schiffman EL. Predictors of Long-Term Temporomandibular Disorder Pain Intensity: An 8-Year Cohort Study. *Journal of Oral & Facial Pain and Headache*. 2018; 32(2):113–122.
16. Schiffman E, Ohrbach R, Truelove E, Look J, Anderson G, Goulet JP, List T, Svensson P, Gonzalez Y, Lobbezoo F, Michelotti A, Brooks SL, Ceusters W, Drangsholt M, Ettlin D, Gaul C, Goldberg LJ, Haythornthwaite JA, Hollender L, Jensen R, John MT, De Laat A, de Leeuw R, Maixner W, van der Meulen M, Murray GM, Nixdorf DR, Palla S, Petersson A, Pionchon P, Smith B, Visscher CM, Zakrzewska J, Dworkin SF; International RDC/TMD Consortium Network, International association for Dental Research; Orofacial Pain Special Interest Group, International Association for the Study of Pain. Diagnostic Criteria for Temporomandibular Disorders (DC/TMD) for Clinical and Research Applications: recommendations of the International RDC/TMD Consortium Network and Orofacial Pain Special Interest Group. *J Oral Facial Pain Headache*. 2014; 28(1):6-27.
17. Collins GS, Reitsma JB, Altman DG, Moons KG. Transparent reporting of a multivariable prediction model for individual prognosis or diagnosis (TRIPOD): the TRIPOD statement'. *BMC Medicine*. 2015; 350:g7594
18. Bishop MD, Torres-Cueco R, Gay CW, Lluch-Girbés E, Beneciuk JM, Bialosky JE. What effect can manual therapy have on a patient's pain experience?. *Pain management*. 2015; 5(6):455-64.
19. Vigotsky AD, Bruhns RP. Corrigendum to "The Role of Descending Modulation in Manual Therapy and Its Analgesic Implications: A Narrative Review". *Pain Res Treat*. 2017; 1535473.
20. Calixtre LB, Moreira RFC, Franchini GH, Albuquerque-Sendín F, Oliveira A.B. Manual therapy for the management of pain and limited range of motion in subjects with signs and symptoms of temporomandibular disorder: A systematic review of randomised controlled trials. *Journal of Oral Rehabilitation*. 2015; 42(11):847–861.
21. Wahlund K, Nilsson IM, Larsson B. Treating temporomandibular disorders in adolescents: a randomized, controlled, sequential comparison of relaxation training and occlusal appliance therapy. *J Oral Facial Pain Headache*. 2015; 29(1):41-50.
22. Ohrbach R, editor. Diagnostic Criteria for Temporomandibular Disorders: Assessment Instruments. Version 15May2016. [Criteri diagnostici per i disordini temporomandibolari: Strumenti valutativi (DC/TMD) Version 17Jan2017] Michelotti A., Segù M., Wrenn C., Rongo R. Trans. [www.rdc-tmdinternational.org](http://www.rdc-tmdinternational.org) Accessed on <31 Mar 2019>.

- 1  
2  
3 23. Crockett DJ, Foreman ME, Alden L, Blasberg B. A comparison of treatment modes in the  
4 management of myofascial pain dysfunction syndrome. *Biofeedback and self-regulation*. 1986;  
5 11(4):279-291.  
6  
7  
8 24. Guarda-Nardini L, Stecco A, Stecco C, Masiero S, Manfredini D. Myofascial Pain of the Jaw  
9 Muscles: Comparison of Short-Term Effectiveness of Botulinum Toxin Injections and Fascial  
10 Manipulation Technique. *CRANIO*. 2012; 30(2):95–102.  
11  
12 25. Nascimento M, Vasconcelos BC, Porto GG, Ferdinanda G, Nogueira CM, Raimundo RD.  
13 Physical therapy and anesthetic blockage for treating temporomandibular disorders: a clinical  
14 trial. *Med Oral Patol Oral Cir Bucal*. 2013; 18(1):81-5.  
15  
16  
17 26. Cleland J, Palmer J. Effectiveness of Manual Physical Therapy, Therapeutic Exercise, and  
18 Patient Education on Bilateral Disc Displacement Without Reduction of the  
19 Temporomandibular Joint: A Single-Case Design. *Journal of Orthopaedic & Sports Physical*  
20 *Therapy*. 2004; 34(9):535–548.  
21  
22  
23 27. Miernik M, Wieckiewicz M, Paradowska A. Massage therapy in myofascial TMD pain  
24 management. *Adv Clin Exp Med*. 2012; 21(5):681-5.  
25  
26  
27 28. Fernandez-de-las-Pena C, Mesa-Jimenez J. *Temporomandibular Disorders: manual Therapy,*  
28 *exercise and needling*. United Kingdom: Handspring Publishing; 2018  
29  
30 29. Bialosky JE, Bishop MD, Price DD, Robinson ME, George SZ. The mechanisms of manual  
31 therapy in the treatment of musculoskeletal pain: a comprehensive model. *Man Ther*. 2009;  
32 14:531–538.  
33  
34  
35 30. Kalamir A, Pollard H, Vitiello A, Bonello R. Intra-oral myofascial therapy for chronic  
36 myogenous temporomandibular disorders: a randomized, controlled pilot study. *Journal of*  
37 *Manual & Manipulative Therapy*, 2010; 18(3):39–146.  
38  
39 31. Gomes CA, Politti F, Andrade DV, de Sousa DF, Herpich CM, Dibai-Filho AV, Gonzalez TO,  
40 Biasotto-Gonzalez DA. Effects of Massage Therapy and Occlusal Splint Therapy on  
41 Mandibular Range of Motion in Individuals With Temporomandibular Disorder: A  
42 Randomized Clinical Trial. *Journal of Manipulative and Physiological Therapeutics*. 2014;  
43 37(3):164–169.  
44  
45  
46 32. Tuncer AB, Ergun N, Tuncer AH, Karahan S. Effectiveness of manual therapy and home  
47 physical therapy in patients with temporomandibular disorders: A randomized controlled trial.  
48 *Journal of Bodywork and Movement Therapies*. 2013; 17(3):302–308.  
49  
50  
51 33. von Piekartz H, Hall T. Orofacial manual therapy improves cervical movement impairment  
52 associated with headache and features of temporomandibular dysfunction: A randomized  
53 controlled trial. *Manual Therapy*. 2013; 18(4):345-50.  
54  
55 34. Haefeli M, Elfering A. ‘Pain assessment: official publication of the European Spine Society,  
56 the European Spinal Deformity Society, and the European Section of the Cervical Spine  
57 Research Society. *European spine journal*. 2005; 15:S17–S24.  
58  
59  
60

- 1
- 2
- 3
- 4 35. Dworkin RH, Turk DC, Farrar JT, Haythornthwaite JA, Jensen MP, Katz NP, Witter J. Core
- 5 outcome measures for chronic pain clinical trials : IMMPACT recommendations. *Pain*. 2005;
- 6 113:9–19.
- 7
- 8 36. Haythornthwaite JA. IMMPACT recommendations for clinical trials: Opportunities for the
- 9 RDC/TMD. *Journal of Oral Rehabilitation*. 2010; 37(10):799–806.
- 10
- 11 37. Higgins JP, Altman DG, Gøtzsche PC, Jüni P, Moher D, Oxman AD, Savovic J, Schulz KF,
- 12 Weeks L, Sterne JA; Cochrane Bias Methods Group; Cochrane Statistical Methods Group. The
- 13 Cochrane Collaboration's tool for assessing risk of bias in randomised trials. *BMJ*. 2011 Oct
- 14 18;343:d5928.
- 15
- 16
- 17 38. Stratford P, Gill C, Westaway M, Binkley J. Assessing disability and change on individual
- 18 patients: a report of a patient specific measure. *Physiotherapy Canada*. 1995; 47:258-263.
- 19
- 20 39. Horn KK, Jennings S, Richardson G, Van Vliet D, Hefford C, Abbott JH. The patient-specific
- 21 functional scale: psychometrics, clinimetrics, and application as a clinical outcome measure.
- 22 *Journal of orthopaedic & sports physical therapy*. 2012; 42(1):30-D17.
- 23
- 24
- 25 40. Abbott JH, Schmitt J. Minimum important differences for the patient-specific functional scale,
- 26 4 region-specific outcome measures, and the numeric pain rating scale. *Journal of Orthopaedic*
- 27 *& Sports Physical Therapy*. 2014; 44(8):560-4.
- 28
- 29
- 30 41. Maughan EF, Lewis JS. Outcome measures in chronic low back pain. *European Spine Journal*.
- 31 2010; 19(9):1484-94.
- 32
- 33 42. Hefford C, Abbott JH, Arnold R, Baxter GD. The patient-specific functional scale: validity,
- 34 reliability, and responsiveness in patients with upper extremity musculoskeletal problems.
- 35 *Journal of orthopaedic & sports physical therapy*. 2012; 42(2):56-65.
- 36
- 37
- 38 43. Westawa MD, Stratford PW, Binkley JM. The patient-specific functional scale: validation of
- 39 its use in persons with neck dysfunction. *Journal of Orthopaedic & Sports Physical Therapy*.
- 40 1998; 27(5):331-8.
- 41
- 42 44. Chatman AB, Hyams SP, Neel JM, Binkley JM, Stratford PW, Schomberg A, Stabler M. The
- 43 Patient-Specific Functional Scale: measurement properties in patients with knee dysfunction.
- 44 *Physical therapy*. 1997; 77(8):820-9.
- 45
- 46
- 47 45. Bair E, Gaynor S, Slade GD, Ohrbach R, Fillingim RB, Greenspan JD, Dubner R, Smith SB,
- 48 Diatchenko L, Maixner W. Identification of clusters of individuals relevant to
- 49 temporomandibular disorders and other chronic pain conditions: the OPPERA study. *Pain*.
- 50 2016; 157(6):1266-78.
- 51
- 52
- 53 46. Clark J, Nijs J, Yeowell G, Goodwin PC. What Are the Predictors of Altered Central Pain
- 54 Modulation in Chronic Musculoskeletal Pain Populations? A Systematic Review. *Pain*
- 55 *Physician*. 2017; 20(6):487-500.
- 56
- 57 47. Brooks R. EuroQol: the current state of play. *Health Policy*. 1996; 37(1):53-72.
- 58
- 59
- 60

- 1  
2  
3  
4  
5  
6  
7  
8  
9  
10  
11  
12  
13  
14  
15  
16  
17  
18  
19  
20  
21  
22  
23  
24  
25  
26  
27  
28  
29  
30  
31  
32  
33  
34  
35  
36  
37  
38  
39  
40  
41  
42  
43  
44  
45  
46  
47  
48  
49  
50  
51  
52  
53  
54  
55  
56  
57  
58  
59  
60
48. Cappelleri JC, McDermott AM, Sadosky AB, Petrie C.D, Martin S. Psychometric properties of a single-item scale to assess sleep quality among individuals with fibromyalgia. *Health Qual Life Outcomes*. 2009; 17(7):54.
  49. Monticone M, Ferrante S, Giorgi I, Galandra C, Rocca B, Foti C. The 27-item coping strategies questionnaire-revised: confirmatory factor analysis, reliability and validity in Italian-speaking subjects with chronic pain. *Pain Res Manag*. 2014; 19(3):153-8.
  50. Zigmond AS, Snaith RP. The hospital anxiety and depression scale. *Acta Psychiatr Scand*. 1983; 67(6):361-70.
  51. Puentedura EJ, Cleland JA, Landers MR, Mintken PE, Louw A, Fernández-de-Las-Peñas C. Development of a clinical prediction rule to identify patients with neck pain likely to benefit from thrust joint manipulation to the cervical spine. *J Orthop Sports Phys Ther*. 2012; 42(7):577-92.
  52. Davis CE, Stockstill JW, Stanley WD, Wu Q. Pain-related worry in patients with chronic orofacial pain. *J Am Dent Assoc*. 2014; 145(7):722-30.
  53. Mayer TG, Neblett R, Cohen H, Howard KJ, Choi YH, Williams MJ, Gatchel RJ. The Development and Psychometric Validation of the Central Sensitization Inventory. *Pain Practise*. 2012; 12(4):276–285.
  54. Peck CC, Goulet JP, Lobbezoo F, Schiffman EL, Alstergren P, Anderson GC, de Leeuw R, Jensen R, Michelotti A, Ohrbach R, Petersson A, List T. Expanding the taxonomy of the diagnostic criteria for temporomandibular disorders. *J Oral Rehabil*. 2011; 41(1):2-23.
  55. Ohrbach R, Michael RM, Willard DM. Waking-state oral parafunctional behaviors: specificity and validity as assessed by electromyography. *European Journal of Oral Sciences*. 2008; 116:438-444.
  56. Fabrigar LR, Wegener DT, MacCallum RC, Strahan EJ. Evaluating the use of exploratory factor analysis in psychological research. *Psychological Methods*. 1998; 4:272–299.
  57. Peduzzi P, Concato J, Kemper E, Holford TR, Feinstein AR. A simulation study of the number of events per variable in logistic regression analysis. *J Clin Epidemiol*. 1996; 49(12):1373-9.
  58. Vittinghoff E, McCulloch CE. Relaxing the rule of ten events per variable in logistic and Cox regression. *Am J Epidemiol*. 2007; 165(6):710-8.
  59. Shmueli G. To explain or to predict?. *Statistical Science*. 2010; 25(3):289-310.
  60. Sterne JA, White IR, Carlin JB, Spratt M, Royston P, Kenward MG, Wood AM, Carpenter JR. Multiple imputation for missing data in epidemiological and clinical research: potential and pitfalls. *BMJ*. 2009; 338:b2393.

### **Author Contributions**

GA, AEB and DF formulated the research question and study focus. GA drafted the initial version of the manuscript with DF. NH, AR, GB and ML provided guidance on topic, methodology and analyses. All authors reviewed and commented on each draft of the protocol. All authors have approved the final manuscript. DF is guarantor

### **Funding Statement**

This research received no specific grant from any funding agency in the public, commercial or not-for-profit sectors.

### **Competing Interests Statement**

The authors have no competing interests to report.

### **Data sharing statement**

No additional data are available.

## **FIGURE LEGEND**

**Figure 1:** Participant flow through the study





1  
2  
3  
4  
5  
6  
7  
8  
9  
10  
11  
12  
13  
14  
15  
16  
17  
18  
19  
20  
21  
22  
23  
24  
25  
26  
27  
28  
29  
30  
31  
32  
33  
34  
35  
36  
37  
38  
39  
40  
41



1  
2  
3 **PREDICTORS OF PAIN REDUCTION FOLLOWING MANUAL THERAPY IN**  
4 **PATIENTS WITH TEMPOROMANDIBULAR DISORDERS:**  
5 **A PROTOCOL FOR A PROSPECTIVE OBSERVATIONAL STUDY**  
6  
7  
8  
9  
10

11 **Supplementary file 1 - Candidate predictors**  
12  
13  
14  
15  
16  
17

18 ***Demographical variables***  
19  
20

21 Participants' demographic variables [age, gender, education] will be collected at baseline  
22 from open hospital records and patient interview.  
23  
24  
25  
26

27 **Age**  
28  
29  
30

31 Age is a significant factor in TMD incidence and prevalence. Lipton et al. found different  
32 age-specific prevalence for face/jaw pain: 6.5% in aged 18-34, 5.0% in 35-54 years old, 4.0% in  
33 55-74 years old and 3.9% in people > 74 year old, showing a prevalence reduction across the  
34 lifetime<sup>1</sup>. By contrast, data from the OPPERA study<sup>2</sup> showed a 40% increased risk for TMD among  
35 individuals aged 25-34 years and a 50% increased risk for TMD among individuals aged 35-50  
36 years.  
37  
38  
39  
40  
41  
42  
43  
44  
45

46 **Gender**  
47  
48  
49

50 Women are 1.5-2 times more likely to develop TMD than men<sup>3-5</sup>. Currently, there is no  
51 study examining the extent of recovery from TMD in men and women. Nevertheless, gender is a  
52 significant factor to be considered.  
53  
54  
55  
56  
57  
58  
59  
60

## Education

The National Centre of Health and Statistic (NCHS)<sup>6</sup> found that the differences in jaw pain prevalence among different educational groups are minimal. On the other hand, there is evidence that people with lower levels of education adopt maladaptive coping strategies, including a tendency to catastrophize about their pain<sup>7</sup>. As a result, the education levels will be collected as candidate predictor of outcome by classifying education into three categories: basic education, intermediate education and university-level education.

## ***General health variable***

### EuroQol Five Dimension Scale, 5-level [EQ-5D-5L]

According to Kapos et al.<sup>8</sup>, health-related quality of life can be a significant factor influencing treatment outcome for TMD. The results showed that a higher health-related quality of life predicted lower TMD pain intensity at an 8 year follow-up. Health-related quality of life will be measured using the Italian version of the EQ-5D-5L [www.euroqol.org]. This instrument transforms different health states into a single value with range 0-1 where 1 is perfect health, and it measures the patient's own judgement about his/her health outcome through a visual analogue scale range 0–100, representing respectively 'worst' to 'best' imaginable health state<sup>9</sup>. The EQ-5D-5L, with 5 possible responses to each item, has increased inter-observer [ICC 2,1 0.57] and test-retest [ICC 2,1 0.69] reliability compared to the previous EQ-5D-3L<sup>10</sup>. Additionally, it has less ceiling effects [20.8% reduction] and adequate convergent validity when compared with the WHO-5 [Spearman rank 0.38-0.51]<sup>11</sup>.

## Sleep quality

1  
2  
3 It is known that chronic pain patients may suffer from poor sleep quality, even if it is  
4 difficult to draw a causal relation<sup>12</sup>. Consequently, sleep quality will be assessed as a candidate  
5 predictor because of its possible role among other factors in the transition from acute to chronic  
6 pain. Sleep quality will be evaluated through an 11-point Numerical Rating Scale [NRS], where 0  
7 is 'the best possible sleep' and 10 is 'the worst possible sleep'. This scale owns moderate  
8 psychometric properties in fibromyalgia patients to assess current sleep quality [over the previous  
9 24 hour period] with a symptom diary<sup>13</sup>. We will use the 0-10 NRS to assess average sleep quality,  
10 related to the preceding 6-months at baseline<sup>14</sup>, although no psychometric properties have  
11 previously been reported for this recall period.  
12  
13  
14  
15  
16  
17  
18  
19  
20  
21  
22  
23

### 24 *Psychosocial features*

25  
26  
27  
28  
29 Psychosocial factors are known to influence TMD onset and chronicity<sup>15</sup>. Psychological  
30 distress is significantly linked to a greater severity and persistence of TMD pain<sup>16</sup>. Moreover,  
31 depression and high levels of stress are significantly more common in people with chronic TMD<sup>17-</sup>  
32  
33  
34  
35  
36  
37  
38  
39  
40  
41  
42  
43  
44  
45  
46  
47  
48  
49  
50  
51  
52  
53  
54  
55  
56  
57  
58  
59  
60  
18. In addition, there is agreement about the predictive strength of psychosocial factors in primary  
care among different musculoskeletal pain conditions<sup>19-20</sup>.

### The Hospital Anxiety and Depression Scales [HADS]

45  
46  
47  
48  
49  
50  
51  
52  
53  
54  
55  
56  
57  
58  
59  
60  
The Italian version of the HAD<sup>21</sup> will be utilised to investigate depression, anxiety and  
manifestations of somatic symptoms<sup>22</sup>. This scale consists of two subscales [anxiety: HADS-A;  
depression: HADS-D] with 7 items and a total score from 0 to 21, with a higher score indicating  
elevated levels of anxiety and depression<sup>23</sup>.

HADS has been studied in different groups confirming adequate to excellent internal

1  
2  
3 consistency of HADS-A [0.68-0.93] and HADS-D [0.67-0.90]<sup>23</sup>. In a coronary heart disease  
4  
5 sample, the standard measurement of error was 1.37 for anxiety and 1.44 for depression; the  
6  
7 minimal detectable change was 3.80 for anxiety and 3.99 for depression<sup>24</sup>. The HADS has  
8  
9 excellent concurrent validity in comparison to other depression/anxiety scales<sup>23</sup>.  
10  
11  
12

### 13 Coping Strategies Questionnaire 27 [CSQ-27]

14  
15  
16  
17 Forssell et al.<sup>25</sup> found that a low perceived ability to control pain increases the risk for poor  
18  
19 prognosis of TMD pain at one year regardless of the type of treatment. The Italian version of the  
20  
21 CSQ-27<sup>26</sup> will be used to provide an indication of coping strategies used by participants when they  
22  
23 are in pain. This 27-item questionnaire contains six domains to assess the strategies for coping  
24  
25 with pain: *Distraction*, *Catastrophizing*, *Ignoring pain sensations*, *Distancing from pain*, *Coping*  
26  
27 *self-statements*, and *Praying*. Patients rate the specific strategies for coping with pain using a  
28  
29 seven-point Likert scale [for each domain] ranging from 0 “Never do that” to 6 “Always do that”,  
30  
31 with higher scores indicating greater use<sup>27</sup>. A recent study in a low back pain cohort<sup>28</sup>, in which  
32  
33 individual items from multiple questionnaires were factorised, suggested that diversion,  
34  
35 reinterpreting and cognitive coping clustered together as a single factor, representing coping  
36  
37 cognitions; by contrast, catastrophizing clustered with pain-related distress items. The original  
38  
39 form was examined in English-speaking subjects and revealed acceptable internal consistency  
40  
41 [Cronbach’s alpha estimates ranging from 0.72 to 0.86] and satisfying construct validity<sup>27</sup>.  
42  
43  
44  
45  
46  
47

### 48 Treatment expectation

49  
50  
51  
52 A positive treatment expectation is considered as a treatment moderator because of its  
53  
54 influence on treatment outcome<sup>29</sup>. A positive treatment expectation is predictive of good outcome  
55  
56  
57  
58  
59  
60

1  
2  
3 because the expectation of benefit (placebo) has a robust effect on pain<sup>30</sup>. In the current study we  
4 will investigate treatment expectation following the same protocol used by Puentedura et al<sup>31</sup>.  
5  
6 Participants will be asked whether they “Completely disagree”, “Somewhat disagree”, “Neutral”,  
7  
8 “Somewhat agree”, “Completely agree” with the following statement: “I believe that *manual*  
9  
10 *techniques applied to my jaw* will significantly help to improve my pain”. If the participant chooses  
11  
12 “completely disagree,” “somewhat disagree,” or “neutral,” there is not a positive expectation that  
13  
14 manual therapy applied to craniomandibular structures will significantly help their  
15  
16 temporomandibular disorder. If the participant chooses “somewhat agree” or “completely agree,”  
17  
18 there is a positive expectation that manual therapy applied to craniomandibular structures will  
19  
20 significantly help their temporomandibular disorder.  
21  
22  
23  
24  
25  
26

### 27 ***TMD characteristics***

28  
29  
30  
31 Based on previous studies on predictive factors of outcome in TMD patients<sup>8,25,32</sup>, pain  
32 characteristics [e.g. pain duration, pain intensity, pain location] are good predictors for pain change  
33  
34 in the long-term. In addition, across a variety of different conditions, pain features were reported  
35  
36 to hold predictive value for pain modulation<sup>19,33-35</sup>.  
37  
38  
39  
40

### 41 Pain Duration

42  
43  
44  
45 According to Grossman et al.<sup>32</sup>, pain duration could be a significant factor influencing the  
46  
47 treatment outcome for TMD. Their results underline the fact that a longer pain duration is  
48  
49 associated with a more refractory therapeutic approach. Consequently, the pain duration [measured  
50  
51 in “days”] will be collected as candidate predictor of outcome from open hospital records and  
52  
53 patient interview.  
54  
55  
56  
57  
58  
59  
60

### Pain intensity

As shown in a previous study<sup>32</sup>, high levels of pain intensity at baseline in people with TMD, can be associated with no-clinically significant results at a midterm [3-4 months] follow up. Pain intensity will be calculated by averaging ratings of current pain, average pain, and worst pain in the past week using the visual analogue scale (VAS), consisting of a horizontal line measuring 10 cm (without marks), with “no pain” written at the left extremity, and “unbearable pain” written at the right extremity<sup>36</sup>. Patients will be educated to trace a perpendicular line on the horizontal line to intend the pain intensity. The distance from the 0 points will be after measured in millimetres. The VAS is a reliable and valid scale to assess pain intensity<sup>37</sup>.

### Pain location and extent

Forssell et al.<sup>25</sup> found that a high number of pain conditions increases the risk for poor prognosis of TMD pain at one year regardless of the type of treatment. Comorbid painful areas are common in patients with TMD pain<sup>38</sup>. Therefore, the pain location and the pain extent will be collected as a candidate predictor of outcome. This will be recorded as described in the DC/TMD protocol<sup>16,39-44</sup>. Patients will be asked to complete a pain drawing symbolising the spatial distribution of the pain, over one chart with a frontal view of the body, one with a dorsal view and one with a dental setting (more specific for the jaw and teeth pain). Pain reported in different body areas (e.g., headache, back pain, pelvic pain, neck pain) can be summarised as a count variable. The extent of pain will be calculated as % of the body area by using an image scanning software (ImageJ: Image Processing and Analysis in Java, <http://imagej.nih.gov/ij/>; Klong Image Measurement: <http://www.imagemasurement.com/experience-image-measurement/pain-assessment-image-measurement>)

### Central Sensitization Inventory (CSI)<sup>45</sup>

Central sensitization can be present in different pain disorders including low back pain<sup>46</sup>, neck pain<sup>47</sup>, fibromyalgia<sup>48</sup>, and TMD<sup>49</sup>. The Italian version of the Central Sensitization Inventory (CSI)<sup>50</sup> will be used. Part A consists of a 0-100 score for 25 items on current health symptoms with five options ranging from ‘never’ (0) to ‘always’ (4). Part B examines previous physician diagnoses among seven different conditions<sup>45</sup>. The CSI has significant test-retest reliability and internal consistency in subjects with and without pain<sup>45</sup>. The Italian version of the CSI showed a satisfactory Cronbach’s alpha [0.87]<sup>50</sup>.

### Classification of TMD

Manual therapy could potentially be beneficial for both myogenous and arthrogenous TMD<sup>51</sup>. The TMD type will therefore be collected as a candidate predictor of outcome. As stated in the inclusion criteria, every patient included in the study will be diagnosed according to the Axis I of the Diagnostic Criteria for TMD DC/TMD<sup>39</sup>. Based on these criteria, Peck et al.<sup>52</sup> reported different types of TMD. This Taxonomic Classification of TMD includes four main domains: TMJ Disorders, Masticatory Muscle Disorders, Headache and Associated Disorders. An additional domain, called Mixed TMD (simultaneous presence of TMJ Disorders and Masticatory Muscle Disorders) will be included. For every patient the type of TMD (total of 5 domains) will be collected as candidate predictors from the patient medical records.

### Characteristic pain intensity and disability



1  
2  
3 A greater number of disability days increases the risk of having clinically significant pain  
4 one year after an initial assessment<sup>25</sup>. In this study we will use the Italian version of Graded  
5 Chronic Pain Scale [GCPS] version 2.0 [www.rdc-tmdinternational.org]<sup>53</sup> following the DC/TMD  
6  
7  
8  
9  
10 protocol recommendations<sup>39,42,44</sup>. This scale has good internal consistency in temporomandibular  
11  
12 pain [Cronbach's alpha of 0.84]<sup>54</sup>. The GCPS measures the facial pain severity over the preceding  
13  
14 6-months by unifying pain intensity and pain-related disability. The characteristic pain intensity  
15  
16 score [range: 0-100] is the mean of three pain intensity measurements: 'at the present time' and  
17  
18 'worst pain' and the 'average' pain over the preceding 6 months. The disability status is measured  
19  
20 with a 0-6 point score derived from a combination of the number of disability days and the  
21  
22 disability level [range: 0-100; limitation given by pain in performing activities of daily living].  
23  
24 Based on these scores, the participant's chronic pain and disability status can be classified into one  
25  
26 of the five ordinal categories of chronic pain severity<sup>55</sup>.

### 31 Oral Behaviour

32  
33  
34  
35 People with abnormal oral behaviours with scores above 25 in the Oral Behaviours  
36  
37 Checklist [OBC] are 75% more likely to develop TMD than individuals with a score below  
38  
39 17<sup>42,44,56</sup>. Parafunctional habits could play a significant role in the development and the persistence  
40  
41 of TMD pain<sup>58</sup>. In this study we will use the Italian version of the RDC/TMD questionnaire Axis  
42  
43 II Oral Behaviours Checklist [www.rdc-tmdinternational.org]<sup>42,56</sup> following the DC/TMD protocol  
44  
45 recommendations<sup>39,56</sup>. The OBC measures the self-reported frequency over the preceding month  
46  
47 of each of 21 activities involving the jaw such as clenching the teeth or bracing the jaw (five ordinal  
48  
49 response options, ranging from "none of the time," coded 0, to "all of the time," coded 4).  
50  
51 Psychometric properties of this instrument suggest that it is valid, with patient behaviours  
52  
53 matching those measured<sup>56,57,59</sup>. Scoring is computed as the sum of the number of items with non-

1  
2  
3 zero response or as a weighted sum [e.g. the sum of the endorsed frequencies of the respective  
4  
5 items]<sup>56</sup>.  
6  
7

## 8 9 10 **Clinical tests of the TMJ and masticatory muscles**

### 11 12 TMJ range of motion

13  
14  
15 Mobility testing of the TMJ denotes an essential sign of TMD, it is one of the most reliable  
16  
17 clinical measures<sup>39</sup>. Grossman et al.<sup>8</sup> examined the preoperative variables of TMD patients with  
18  
19 articular disc displacement without reduction that may alter the effects of arthrocentesis on joint  
20  
21 effusion. They observed that small maximum interincisal distance influences treatment outcome.  
22  
23 As a result, we will use the Maximal Mouth Opening (MMO) without pain as measure of TMJ  
24  
25 range of motion. The measurements will be in millimeters and will be taken with a ruler in a  
26  
27 neutral craniocervical position [e.g. sitting or supine]. The distance between the incisal edges of  
28  
29 the maxillary and mandibular reference teeth, as described in the DC/TMD protocol<sup>44</sup>, will be  
30  
31 measured. Participants will be asked to open the mouth as wide as they can without feeling any  
32  
33 pain, or without increasing any present pain. The tip of the ruler will be located against the incisal  
34  
35 edge of the mandibular reference incisor, and the distance to the mesial-distal center of the edge  
36  
37 of the maxillary central incisor will be read. The test will be repeated twice if the pain-free opening  
38  
39 if less than 30mm<sup>44</sup>. Assessment of mandibular ROM in a neutral craniocervical position obtained  
40  
41 good inter- and intra-rater reliability for MMO<sup>60</sup>.  
42  
43  
44  
45  
46  
47

### 48 49 TMJ palpation pain:

50  
51  
52 Pain induced in joints via palpation is a useful clinical test that allows to understand if the  
53  
54 provoked pain duplicates or replicates the patient's pain complaint by identifying potential joint  
55  
56  
57  
58  
59  
60

1  
2  
3 origin<sup>44</sup>. For this palpation, finger pressure is calibrated [1.0 kg], as described in the DC/TMD  
4 protocol<sup>44</sup>, using a simple hand-held algometer prior to palpation examination. While the  
5 participant mandible is in a comfortable position or in a slightly protruded position, the examiner's  
6 index finger will be placed just anterior to the tragus of the ear and dorsal to the TMJ with the  
7 participant in neutral craniocervical position e.g. sitting or supine. The index finger will press while  
8 orbiting around the lateral pole in a circular fashion over the superior aspect of the condyle and  
9 then anteriorly [from the 9:00 to the 3:00 position, and then continuing fully around the condyle].  
10 Palpation will last 5 seconds for each pressed point<sup>44</sup>. If a participant complains of familiar pain in  
11 at least one pressed point the point score of this test will be 1; if there is no pain at any points the  
12 point score of this test will be 0 [range 0-1: no pain =0; pain = 1]. Palpation will be performed in  
13 the left and right side. The interexaminer reliability values of TMJ palpation in TMD patients is  
14 0.59 and the specificity values is acceptable [above 0.90]<sup>61</sup>.

### 31 Muscle palpation pain

32  
33  
34 For this assessment, finger pressure is calibrated to 1.0 kg for masseter muscles and 0.5 kg  
35 for lateral pterygoid area and temporalis tendons as described in the DC/TMD protocol<sup>44</sup>, using a  
36 simple hand-held algometer prior to palpation examination. Pain induced in muscles via palpation  
37 is a useful clinical test that allows to understand whether the provoked pain duplicates or replicates  
38 the patient's pain complaint by identifying potential muscular origin<sup>44</sup>. Palpation will be performed  
39 with the participant in a neutral craniocervical position (e.g. sitting or supine), on the left and right  
40 side and will last 5 seconds for each testing point<sup>44</sup>. The inter-examiner reliability values of  
41 palpation in TMD patients is 0.59 and the specificity values are acceptable [above 0.90]<sup>61</sup>. The  
42 feasibility of the lateral pterygoid muscle palpation is controversial. Some authors defined it as a  
43 feasible palpation technique<sup>62</sup>, and others considered this muscle inaccessible<sup>63</sup>. Therefore, in this  
44  
45  
46  
47  
48  
49  
50  
51  
52  
53  
54  
55  
56  
57  
58  
59  
60

1  
2  
3 study, this parameter [pain at lateral pterygoid site] will not be considered alone but in combination  
4  
5 with pain at other muscular sites.  
6  
7  
8  
9

10  
11 *Lateral pterygoid area:* palpation will be performed with a finger pressure calibrated at 0.5  
12 kg (DC/TMD protocol<sup>44</sup>). The palpation will take place as described in FIG.1. If a participant  
13 complains of familiar pain during palpation the lateral pterygoid area will be considered as a  
14 painful site.  
15  
16  
17  
18  
19  
20  
21  
22  
23  
24  
25

26  
27 **FIG. 1 Lateral pterygoid area:** Finger is placed as  
28 shown. Palpate the vestibule in posterior-superior-  
29 medial direction while the mandible is omolaterally  
30  
31 medial direction while the mandible is omolaterally  
32  
33 deviated.  
34  
35  
36  
37

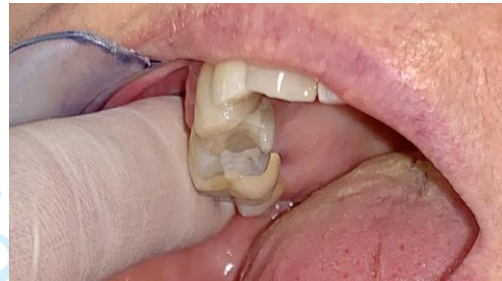

38  
39 *Masseter muscle:* masseter palpation consists of a sequence of three palpation sites with  
40 finger pressure calibrated to 1.0 kg (DC/TMD protocol<sup>44</sup>): origin zone [inferior to the bony margin  
41 of the zygomatic process], body zone [in front of ear lobe] and insertion zone [superior to the  
42 mandibular angle]. In each zone, the palpation continues until the anterior boundary of the muscle  
43 is reached<sup>44</sup>. If a participant complains of familiar pain in at least one pressed point, the masseter  
44  
45 muscle will be considered as a painful site.  
46  
47  
48  
49  
50  
51  
52

53  
54 *Temporalis tendon area:* the palpation will be performed with a finger pressure calibrated  
55 to 0.5 kg (DC/TMD protocol<sup>44</sup>). The palpation will take place as described in FIG.2. If a participant  
56  
57  
58  
59  
60

1  
2  
3 complains of familiar pain during the palpation the temporalis tendon area will be considered as a  
4  
5 painful site.  
6  
7  
8  
9

10  
11 **FIG. 2 Temporalis tendon area:** Finger is located against the ascending mandibular ramus  
12 while the mouth is slightly open. The palpation direction is  
13 superior as far as possible by following the bone surface.  
14  
15  
16  
17

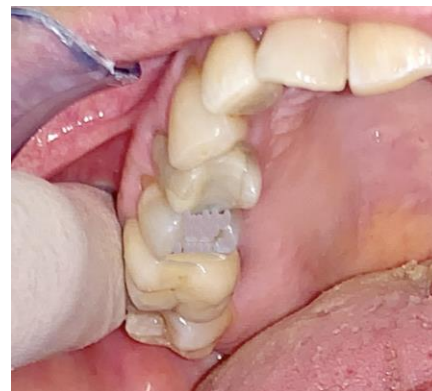

18  
19  
20  
21  
22 *Total score:* if a participant complains of familiar pain  
23 in at least three of the six examined sites the score will be 1,  
24 otherwise it will be 0 [score range 0–1: < 3 sites with familiar pain = 0; ≥ 3 sites with familiar pain  
25 = 1]<sup>64</sup>.  
26  
27  
28  
29  
30  
31  
32  
33  
34

### 35 JAw-test

36  
37  
38 The JAw-test is a clinical test that aims to investigate the immediate effects of four brief  
39 intraoral manual therapy techniques on pain and on TMJ range of motion. The participant will be  
40 positioned in supine position. Before starting the test, the TMJ range of motion without pain will  
41 be measured [MMO - millimeters] with a ruler, as described above, according to DC/TMD  
42 protocol<sup>44</sup>. Then the participant will be asked to rate his/her pain through the Verbal Rating Scale  
43 (VRS) “at rest”, “during clenching” and “during the maximal opening of the mouth”; an average  
44 of the three pain scores will be registered. For this test, finger pressure is calibrated [1.0 kg], in the  
45 same way described in the DC/TMD protocol<sup>44</sup>, using a simple hand-held algometer prior to  
46  
47  
48  
49  
50  
51  
52  
53  
54  
55  
56  
57  
58  
59  
60

1  
2  
3 palpation examination.  
4

5 Participants will be informed with the following words: “*I am going to perform four manual*  
6 *techniques on some muscles and joints in your jaw region. You may feel a little pain, if the pain*  
7 *increases and becomes too intense, let me know, I will reduce the pressure until the pain returns*  
8 *to acceptable levels*”.  
9  
10  
11  
12  
13

14 *First technique: Lateral pterygoid area*

15  
16  
17 This techniques will be performed on the most painful side. While one hand stabilizes the  
18 participant’s head on the least painful side, the other hand will be used to apply pressure over the  
19 lateral pterygoid area as described above and in accordance with the DC/TMD protocol<sup>44</sup>. In this  
20 position, compression [1.0 kg] is applied for 30-60 seconds.  
21  
22  
23  
24  
25

26 *Second technique: Temporalis tendon area*

27  
28 This techniques will be performed on the most painful side. While one hand stabilizes the  
29 participant’s head on the least painful side, the other hand (index finger) will be used to apply  
30 pressure over the Temporalis tendon area as described above and in accordance with the DC/TMD  
31 protocol<sup>44</sup>. In this position, compression [1.0 kg] is applied for 30-60 seconds.  
32  
33  
34  
35  
36  
37

38 *Third technique: Mylohyoid area*

39  
40 The participant will be instructed to open the mouth to let the examiner’s finger reach the  
41 mylohyoid area in a central position on the mylohyoid raphe. The other hand of the examiner will  
42 reach the same area using a finger through an extraoral approach. In this position a combined  
43 compression (1.0 kg) will be applied for 30-60 seconds.  
44  
45  
46  
47  
48

49 *Fourth technique: TMJ mobilization*

50  
51 An intraoral ventral and caudal anterior glide [mobilisation grades I and II] of both the  
52 TMJs will be performed for 30 seconds as described by Cleland et al.<sup>65</sup>  
53  
54  
55  
56  
57  
58  
59  
60

1  
2  
3 *Final scores:*  
4

5           After the tests, the TMJ range of motion without pain will be measured [MMO -  
6 millimeters] with a ruler, as described above, according to DC/TMD protocol<sup>44</sup>. Then the  
7 participant will be asked to rate his/her pain using the Verbal Rating Scale (VRS) “at rest”, “during  
8 clenching” and “during the maximal opening of the mouth”; an average of these three pain scores  
9 will be registered. If a participant shows only an improvement in pain [average score VRS pre-test  
10 > average score VRS post-test] the score will be 1; if a participant shows only an improvement of  
11 TMJ mobility [MMO pre-test < MMO post-test at least 2 millimeters] the score will be 1; if a  
12 participant shows improvements in both pain and TMJ mobility, the score will be 2; if a participant  
13 shows no improvements the score will be 0 [Score range 0-2: 0 = no change; 1 = VRS improvement  
14 or MMO improvement; 2 = improvement of both].  
15  
16  
17  
18  
19  
20  
21  
22  
23  
24  
25  
26  
27  
28  
29  
30  
31  
32  
33  
34  
35  
36  
37  
38  
39  
40  
41  
42  
43  
44  
45  
46  
47  
48  
49  
50  
51  
52  
53  
54  
55  
56  
57  
58  
59  
60

## REFERENCES

1. Lipton JA, Ship JA, Larach-Robinson D. Estimated prevalence and distribution of reported orofacial pain in United States. *J Am Dent Assoc.* 1993;124:115-112.
2. Fillingim RB, Ohrbach R, Greenspan JD, Knott C, Dubner R, Bair E, Baraian C, Slade GD, Maixner W. Potential psychosocial risk factors for chronic TMD: descriptive data and empirically identified domains from the OPPERA case-control study. *J Pain.* 2011; 12(11 Suppl):T46-60.
3. Helkimo M. Studies on function and dysfunction of the masticatory system. IV. Age and sex distribution of symptoms of dysfunction of the masticatory system in Lapps in the north of Finland. *Acta Odontol Scand.* 194; 32(4):255-67.
4. Von Korff M, Dworkin SF, Le Resche L, Kruger A. An epidemiologic comparison of pain complaints'. *Pain.* 1988; 32(2):173-83.
5. Plesh O, Adams SH, Gansky SA. Temporomandibular joint and muscle disorders-type pain and comorbid pains in a national US sample. *J Orofacial Pain.* 2011;25: 190-198.
6. NCHS. Summary Health Statistics Tables for the U.S. Population: National Health Interview Survey, 2014 (12/2015) [Online]. CDC/National Centre of Health and Statistics. Available: <http://www.cdc.gov/nchs/nhis/SHS/tables.htm> [March 10, 2019]
7. Roth RS, Geisser ME. Educational achievement and chronic pain disability: mediating role of pain-related cognitions. *Clin J Pain.* 2002; 18(5):286-96.
8. Kapos FP, Look JO, Zhang L, Hodges JS, Schiffman EL. Predictors of Long-Term Temporomandibular Disorder Pain Intensity: An 8-Year Cohort Study. *Journal of Oral & Facial Pain and Headache.* 2018; 32(2):113–122.
9. Brooks R. EuroQol: the current state of play. *Health Policy.* 1996; 37(1):53-72.
10. Janssen MF, Birnie E, Haagsma JA. Comparing the standard EQ-5D three-level system with a five-level version. *Value Health.* 2008; 11(2):275-84.
11. Janssen MF, Pickard AS, Golicki D. Measurement properties of the EQ-5D-5L compared to the EQ-5D-3L across eight patient groups: a multi-country study. *Qual Life Res.* 2013; 22(7):1717-27.
12. Sayar K, Arikan M, Yontem T. Sleep quality in chronic pain patients. *Can J Psychiatry.* 2002; 47(9):844-8.
13. Cappelleri JC, McDermott AM, Sadosky AB, Petrie C.D, Martin S. Psychometric properties of a single-item scale to assess sleep quality among individuals with fibromyalgia. *Health Qual Life Outcomes.* 2009; 17(7):54.



14. Rushton AB, Evans DW, Middlebrook N, Heneghan NR, Small C, Lord J, Patel JM, Falla D. Development of a screening tool to predict the risk of chronic pain and disability following musculoskeletal trauma: protocol for a prospective observational study in the United Kingdom. *BMJ Open*. 2018; 28;8(4):e017876.
15. Kight M, Gatchel RJ, Wesley L. Temporomandibular disorders: evidence for significant overlap with psychopathology. *Health Psychol*. 1999; 18(2):177-82.
16. Dworkin SF, Von Korff MR, LeResche L. Multiple pains and psychiatric disturbance: An epidemiologic investigation. *Archives of General Psychiatry*. 1990; 47:239-44.
17. Keefe FJ, Rumble ME, Scipio CD, Giordano LA, Perri LM. Psychological aspects of persistent pain: current state of the science'. *J Pain*. 2004; 5(4):195-211.
18. Gatchel RJ, Peng YB, Peters ML, Fuchs PN, Turk DC. The biopsychosocial approach to chronic pain: scientific advances and future directions. *Psychol Bull*. 2007; 133(4):581-624.
19. Mallen CD, Peat G, Thomas E. Prognostic factors for musculoskeletal pain in primary care: a systematic review. *Br J Gen Pract*. 2007; 57(541):655-61.
20. Artus M, Campbell P, Mallen CD. Generic prognostic factors for musculoskeletal pain in primary care: a systematic review. *BMJ Open*. 2017; 7(1):e012901.
21. Iani L, Lauriola M, Costantini M. A confirmatory bifactor analysis of the Hospital Anxiety and Depression Scale in an Italian community sample. *Health and quality of life outcomes*. 2014; 12:84.
22. Zigmond AS, Snaith RP. The hospital anxiety and depression scale. *Acta Psychiatr Scand*. 1983; 67(6):361-70.
23. Bjelland I, Dahl AA, Haug TT. The validity of the Hospital Anxiety and Depression Scale. An updated literature review. *J Psychosom Res*. 2002; 52(2):69-77.
24. Wang W, Chair SY, Thompson DR, Twinn SF. A Psychometric Evaluation of the Chinese Version of the Hospital Anxiety and Depression Scale in Patients with Coronary Heart Disease. *Journal of Clinical Nursing*. 2009; 18:1908-15.
25. Forssell H, Kauko T, Kotiranta U, Suvinen T. Predictors for future clinically significant pain in patients with temporomandibular disorder: A prospective cohort study. *European Journal of Pain*. 2017; 21(1):188-197.
26. Monticone M, Ferrante S, Giorgi I, Galandra C, Rocca B, Foti C. The 27-item coping strategies questionnaire-revised: confirmatory factor analysis, reliability and validity in Italian-speaking subjects with chronic pain. *Pain Res Manag*. 2014; 19(3):153-8.

- 1  
2  
3 27. Robinson ME, Riley JL, Myers CD, Sadler IJ, Kvaal SA, Geisser ME, Keefe FJ. The Coping  
4 Strategies Questionnaire: a large sample, item level factor analysis. *Clin J Pain*. 1997; 13(1):43-9.  
5  
6  
7 28. Campbell P, Foster NF, Thomas E, Dunn KM. Prognostic Indicators of Low Back Pain in Primary  
8 Care: Five-Year Prospective Study. *J Pain*. 2013; 14(8):873–83.  
9  
10 29. Nicholas MK, Linton SJ, Watson PJ, Main CJ. Early identification and management of  
11 psychological risk factors (“yellow flags”) in patients with low back pain: a reappraisal. *Phys Ther*.  
12 2011; 91:737-753.  
13  
14 30. Vase L, Petersen GL, Riley JL, Price DD. Factors contributing to large analgesic effects in placebo  
15 mechanism studies conducted between 2002 and 2007’. *Pain*. 2009; 145:36-44.  
16  
17  
18 31. Puentedura EJ, Cleland JA, Landers MR, Mintken PE, Louw A, Fernández-de-Las-Peñas C.  
19 Development of a clinical prediction rule to identify patients with neck pain likely to benefit from  
20 thrust joint manipulation to the cervical spine. *J Orthop Sports Phys Ther*. 2012; 42(7):577-92.  
21  
22  
23 32. Grossman E, Poluha RL, Iwaki LCV, Santana RG, Filho LI. Predictors of arthrocentesis outcome  
24 on joint effusion in patients with disk displacement without reduction. *Oral Surgery, Oral  
25 Medicine, Oral Pathology and Oral Radiology*. 2018; 125(4), 382–388.  
26  
27  
28 33. Clay FJ, Watson WL, Newstead SV. A systematic review of early prognostic factors for persisting  
29 pain following acute orthopedic trauma. *Pain Res Manag*. 2012; 17(1):35-44.  
30  
31 34. Clay FJ, Newstead SV, Watson WL. Bio-psychosocial determinants of persistent pain 6 months  
32 after non-life-threatening acute orthopaedic trauma. *J Pain*. 2010; 11(5):420-30.  
33  
34 35. Kamaleri Y, Natvig B, Ihlebaek CM. Change in the number of musculoskeletal pain sites: A 14-  
35 year prospective study. *Pain*. 2009; 141(1-2):25-30.  
36  
37  
38 36. Wewers ME, Lowe NK. A critical review of visual analogue scales in the measurement of clinical  
39 phenomena. *Res Nurs Health*. 1990; 13:227–236.  
40  
41  
42 37. Dworkin RH, Turk DC, Farrar JT, Haythornthwaite JA, Jensen MP, Katz NP, Witter J. Core  
43 outcome measures for chronic pain clinical trials : IMMPACT recommendations. *Pain*. 2005;  
44 113:9–19.  
45  
46 38. Velly A, Schweinhardt P, Friction J. *Comorbid conditions: How they affect orofacial pain. In  
47 Treatment of TMDs: Bridging the Gap Between Advances in Research and Clinical Patient  
48 Management*. Greene, CS, Laskin DM, eds. (Chicago: Quintessence) pp. 91–98; 2013.  
49  
50 39. Schiffman E, Ohrbach R, Truelove E, Look J, Anderson G, Goulet JP, List T, Svensson P,  
51 Gonzalez Y, Lobbezoo F, Michelotti A, Brooks SL, Ceusters W, Drangsholt M, Ettlin D, Gaul C,  
52 Goldberg LJ, Haythornthwaite JA, Hollender L, Jensen R, John MT, De Laat A, de Leeuw R,  
53 Maixner W, van der Meulen M, Murray GM, Nixdorf DR, Palla S, Petersson A, Pionchon P, Smith  
54 B, Visscher CM, Zakrzewska J, Dworkin SF; International RDC/TMD Consortium Network,  
55  
56  
57  
58  
59

- 1  
2  
3 International association for Dental Research; Orofacial Pain Special Interest Group, International  
4 Association for the Study of Pain. Diagnostic Criteria for Temporomandibular Disorders  
5 (DC/TMD) for Clinical and Research Applications: recommendations of the International  
6 RDC/TMD Consortium Network and Orofacial Pain Special Interest Group. *J Oral Facial Pain*  
7 Headache. 2014; 28(1):6-27.  
8  
9
- 10 40. Macfarlane GJ. Widespread pain: is an improved classification possible?. *Journal of*  
11 *Rheumatology*. 1996, 23(9):1628-1632.  
12  
13 41. Margolis RB, et al. Test-retest reliability of the pain drawing instrument. *Pain*. 1988; 33: 49-51.  
14  
15 42. Ohrbach R, Fillingim RB, Mulkey F, et al. Clinical findings and pain symptoms as potential risk  
16 factors for chronic TMD: Descriptive data and empirically identified domains from the OPPERA  
17 case-control study. *Journal of Pain*. 2011; 12 (11, Supplement 3):T27-T45.  
18  
19 43. Sanders AE, Slade GD, Bair E, Fillingim RB, Knott C, Dubner R, Greenspan JD, Maixner W,  
20 Ohrbach R. General health status and incidence of first-onset temporomandibular disorder: the  
21 OPPERA prospective cohort study. *J Pain*. 2013 Dec;14(12 Suppl):T51-62.  
22  
23 44. Ohrbach R, et al. Clinical orofacial characteristics associated with risk of first-onset TMD: the  
24 OPPERA prospective cohort study. *Journal of Pain*. 2013, 14(Supplement 2)(12):T33-T50.  
25  
26 45. Mayer TG, Neblett R, Cohen H, Howard KJ, Choi YH, Williams MJ, Gatchel RJ. The  
27 Development and Psychometric Validation of the Central Sensitization Inventory. *Pain Practise*.  
28 2012; 12(4):276–285.  
29  
30 46. Roussel NA, Nijs J, Meeus M, Mylius V, Fayt C, Oostendorp R. Central sensitization and altered  
31 central pain processing in chronic low back pain: fact or myth?. *The Clinical journal of pain*. 2013;  
32 29:625-38.  
33  
34 47. Van Oosterwijck J, Nijs J, Meeus M, Paul L. Evidence for central sensitization in chronic  
35 whiplash: a systematic literature review. *European Journal of Pain*. 2013; 17:299-312.  
36  
37 48. Desmeules J, Chabert J, Rebsamen M, Rapiti E, Piguet V, Besson M. Central pain sensitization,  
38 COMT Val158Met polymorphism, and emotional factors in fibromyalgia. *The Journal of Pain*.  
39 2014; 15:129-35.  
40  
41 49. Fernández-de-Las-Peñas C, Galán-del-Río F, Fernández-Carnero J, Pesquera J, Arendt Nielsen L,  
42 Svensson P. Bilateral widespread mechanical pain sensitivity in women with myofascial  
43 temporomandibular disorder: evidence of impairment in central nociceptive processing. *The*  
44 *Journal of Pain*. 2009; 10:1170-8.  
45  
46 50. Chiarotto A, Viti C, Sulli A, Cutolo M, Testa M, Piscitelli D. Cross-cultural adaptation and validity  
47 of the Italian version of the Central Sensitization Inventory. *Musculoskelet Sci Pract*. 2018; 37:20-  
48 28.  
49  
50  
51  
52  
53  
54  
55  
56  
57  
58  
59  
60

- 1  
2  
3 51. Armijo-Olivo S, Pitance L, Singh V, Neto F, Thie N, Michelotti A. Effectiveness of Manual  
4 Therapy and Therapeutic Exercise for Temporomandibular Disorders: Systematic Review and  
5 Meta-Analysis. *Physical Therapy*. 2016; 96(1): 9–25.  
6  
7  
8 52. Peck CC, Goulet JP, Lobbezoo F, Schiffman EL, Alstergren P, Anderson GC, de Leeuw R, Jensen  
9 R, Michelotti A, Ohrbach R, Petersson A, List T. Expanding the taxonomy of the diagnostic criteria  
10 for temporomandibular disorders. *J Oral Rehabil*. 201; 41(1):2-23.  
11  
12 53. Von Korff, M. *Assessment of chronic pain in epidemiological and health services research:  
13 Empirical bases and new directions. Handbook of Pain Assessment*. D. C. Turk and R. Melzack.  
14 New York, Guilford Press: 455- 473. 2011.  
15  
16  
17 54. Von Korff, M., et al. Grading the severity of chronic pain. *Pain*. 1992; 50:133-149.  
18  
19 55. Von Korff M, et al. *Research diagnostic criteria. Axis II: Pain-related disability and psychological  
20 status*. In: S.F. Dworkin & L. LeResche (Eds.), *Research Diagnostic Criteria for  
21 Temporomandibular Disorders*. Journal of Craniomandibular Disorders, Facial and Oral Pain 6:  
22 330-334. 1992  
23  
24  
25 56. Ohrbach, R., et al. Waking-state oral parafunctional behaviors: specificity and validity as assessed  
26 by electromyography. *European Journal of Oral Sciences*. 2008; 116: 438-444.  
27  
28  
29 57. Ohrbach R, List T, Goulet JP, Svensson P. Recommendations from the International Consensus  
30 Workshop: Convergence on an Orofacial Pain Taxonomy. *Journal of Oral Rehabilitation*.  
31 2010;37:807-12.  
32  
33 58. Glaros AG, Marszalek JM, Williams KB. Longitudinal Multilevel Modeling of Facial Pain,  
34 Muscle Tension, and Stress. *Journal of dental research*. 2016; 95(4), 416-22.  
35  
36  
37 59. Markiewicz MR, Ohrbach R, McCall WD Jr. Oral behaviors checklist: Reliability of performance  
38 in targeted waking-state behaviors. *J Orofacial Pain*. 2006; 20:306-316.  
39  
40 60. Beltran-Alacre H, López-de-Uralde-Villanueva I, Paris-Aleman A, Angulo-Díaz-Parreño S, La  
41 Touche R. Intra-rater and Inter-rater Reliability of Mandibular Range of Motion Measures  
42 Considering a Neutral Craniocervical Position. *Journal of physical therapy science*. 2014; 26(6),  
43 915-20.  
44  
45  
46 61. Gomes MB, Guimarães JP, Guimarães FC, Neves AC. Palpation and pressure pain threshold:  
47 reliability and validity in patients with temporomandibular disorders. *Cranio*. 2008; 26(3):202-10  
48  
49  
50 62. Stelzenmueller W, Umstadt H, Weber D, Goenner-Oezkan V, Kopp S, Lisson J. Evidence - The  
51 intraoral palpability of the lateral pterygoid muscle - A prospective study. *Ann Anat*. 2016; 206:89-  
52 95.  
53  
54 63. Türp JC, Minagi S. Palpation of the lateral pterygoid region in TMD--where is the evidence?. *J  
55 Dent*. 2001; 29(7):475-83.  
56  
57  
58  
59

- 1  
2  
3  
4 64. Friction J. *Physical evaluation: the need for a standardized examination*. In: Friction JR, ed.  
5 Temporomandibular joint and craniofacial pain: diagnosis and management. St Louis: Ishiyaku  
6 Euroamerica; 1988:46–47.  
7  
8  
9 65. Cleland J, Palmer J. Effectiveness of Manual Physical Therapy, Therapeutic Exercise, and Patient  
10 Education on Bilateral Disc Displacement Without Reduction of the Temporomandibular Joint: A  
11 Single-Case Design. *Journal of Orthopaedic & Sports Physical Therapy*. 2004; 34(9):535–548.  
12  
13  
14  
15  
16  
17  
18  
19  
20  
21  
22  
23  
24  
25  
26  
27  
28  
29  
30  
31  
32  
33  
34  
35  
36  
37  
38  
39  
40  
41  
42  
43  
44  
45  
46  
47  
48  
49  
50  
51  
52  
53  
54  
55  
56  
57  
58  
59  
60

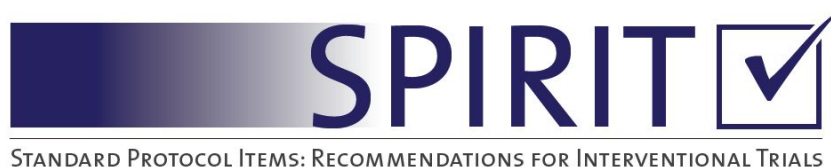

SPIRIT 2013 Checklist: Recommended items to address in a clinical trial protocol and related documents\*

| Section/item                      | Item No | Description                                                                                                                                                                                                                                                                                    |
|-----------------------------------|---------|------------------------------------------------------------------------------------------------------------------------------------------------------------------------------------------------------------------------------------------------------------------------------------------------|
| <b>Administrative information</b> |         |                                                                                                                                                                                                                                                                                                |
| Title                             | 1       | Descriptive title identifying the study design, population, interventions, and, if applicable, trial acronym – Page 1                                                                                                                                                                          |
| Trial registration                | 2a      | Trial identifier and registry name. If not yet registered, name of intended registry – N/A                                                                                                                                                                                                     |
|                                   | 2b      | All items from the World Health Organization Trial Registration Data Set – N/A                                                                                                                                                                                                                 |
| Protocol version                  | 3       | Date and version identifier – Page 1                                                                                                                                                                                                                                                           |
| Funding                           | 4       | Sources and types of financial, material, and other support – Page 22                                                                                                                                                                                                                          |
| Roles and responsibilities        | 5a      | Names, affiliations, and roles of protocol contributors – Pages 1 and 22                                                                                                                                                                                                                       |
|                                   | 5b      | Name and contact information for the trial sponsor – N/A                                                                                                                                                                                                                                       |
|                                   | 5c      | Role of study sponsor and funders, if any, in study design; collection, management, analysis, and interpretation of data; writing of the report; and the decision to submit the report for publication, including whether they will have ultimate authority over any of these activities – N/A |
|                                   | 5d      | Composition, roles, and responsibilities of the coordinating centre, steering committee, endpoint adjudication committee, data management team, and other individuals or groups overseeing the trial, if applicable (see Item 21a for data monitoring committee) – N/A                         |
| <b>Introduction</b>               |         |                                                                                                                                                                                                                                                                                                |
| Background and rationale          | 6a      | Description of research question and justification for undertaking the trial, including summary of relevant studies (published and unpublished) examining benefits and harms for each intervention – Pages 4-6                                                                                 |
|                                   | 6b      | Explanation for choice of comparators – Supplementary file                                                                                                                                                                                                                                     |
| Objectives                        | 7       | Specific objectives or hypotheses - Page 5-6                                                                                                                                                                                                                                                   |

1  
2 Trial design 8 Description of trial design including type of trial (eg, parallel group,  
3 crossover, factorial, single group), allocation ratio, and framework (eg,  
4 superiority, equivalence, noninferiority, exploratory) – N/A  
5  
6  
7

8 **Methods: Participants, interventions, and outcomes**  
9

10 Study setting 9 Description of study settings (eg, community clinic, academic hospital)  
11 and list of countries where data will be collected. Reference to where  
12 list of study sites can be obtained – Page 6  
13

14 Eligibility criteria 10 Inclusion and exclusion criteria for participants. If applicable, eligibility  
15 criteria for study centres and individuals who will perform the  
16 interventions (eg, surgeons, psychotherapists) – Pages 7  
17  
18

19 Interventions 11a Interventions for each group with sufficient detail to allow replication,  
20 including how and when they will be administered – Pages 8-9  
21

22 11b Criteria for discontinuing or modifying allocated interventions for a  
23 given trial participant (eg, drug dose change in response to harms,  
24 participant request, or improving/worsening disease) – Page 9  
25

26 11c Strategies to improve adherence to intervention protocols, and any  
27 procedures for monitoring adherence (eg, drug tablet return,  
28 laboratory tests) – N/A  
29

30 11d Relevant concomitant care and interventions that are permitted or  
31 prohibited during the trial – Pages 7 and 9  
32  
33

34 Outcomes 12 Primary, secondary, and other outcomes, including the specific  
35 measurement variable (eg, systolic blood pressure), analysis metric  
36 (eg, change from baseline, final value, time to event), method of  
37 aggregation (eg, median, proportion), and time point for each  
38 outcome. Explanation of the clinical relevance of chosen efficacy and  
39 harm outcomes is strongly recommended – Page 9 and 10 (primary  
40 outcome), Supplementary file (candidate predictors)  
41  
42

43 Participant 13 Time schedule of enrolment, interventions (including any run-ins and  
44 timeline washouts), assessments, and visits for participants. A schematic  
45 diagram is highly recommended (see Figure) – Pages 7-8  
46  
47

48 Sample size 14 Estimated number of participants needed to achieve study objectives  
49 and how it was determined, including clinical and statistical  
50 assumptions supporting any sample size calculations – Page 12  
51

52 Recruitment 15 Strategies for achieving adequate participant enrolment to reach  
53 target sample size – Pages 7  
54  
55

56 **Methods: Assignment of interventions (for controlled trials)**  
57

58 Allocation:  
59  
60



|    |                |     |                                                                         |
|----|----------------|-----|-------------------------------------------------------------------------|
| 1  |                |     |                                                                         |
| 2  | Sequence       | 16a | Method of generating the allocation sequence (eg, computer-             |
| 3  | generation     |     | generated random numbers), and list of any factors for stratification.  |
| 4  |                |     | To reduce predictability of a random sequence, details of any planned   |
| 5  |                |     | restriction (eg, blocking) should be provided in a separate document    |
| 6  |                |     | that is unavailable to those who enrol participants or assign           |
| 7  |                |     | interventions – N/A                                                     |
| 8  |                |     |                                                                         |
| 9  |                |     |                                                                         |
| 10 | Allocation     | 16b | Mechanism of implementing the allocation sequence (eg, central          |
| 11 | concealment    |     | telephone; sequentially numbered, opaque, sealed envelopes),            |
| 12 | mechanism      |     | describing any steps to conceal the sequence until interventions are    |
| 13 |                |     | assigned – N/A                                                          |
| 14 |                |     |                                                                         |
| 15 | Implementation | 16c | Who will generate the allocation sequence, who will enrol participants, |
| 16 |                |     | and who will assign participants to interventions – N/A                 |
| 17 |                |     |                                                                         |
| 18 |                |     |                                                                         |
| 19 | Blinding       | 17a | Who will be blinded after assignment to interventions (eg, trial        |
| 20 | (masking)      |     | participants, care providers, outcome assessors, data analysts), and    |
| 21 |                |     | how N/A                                                                 |
| 22 |                |     |                                                                         |
| 23 |                | 17b | If blinded, circumstances under which unblinding is permissible, and    |
| 24 |                |     | procedure for revealing a participant's allocated intervention during   |
| 25 |                |     | the trial – N/A                                                         |
| 26 |                |     |                                                                         |
| 27 |                |     |                                                                         |

### Methods: Data collection, management, and analysis

|    |                 |     |                                                                          |
|----|-----------------|-----|--------------------------------------------------------------------------|
| 28 |                 |     |                                                                          |
| 29 |                 |     |                                                                          |
| 30 | Data collection | 18a | Plans for assessment and collection of outcome, baseline, and other      |
| 31 | methods         |     | trial data, including any related processes to promote data quality (eg, |
| 32 |                 |     | duplicate measurements, training of assessors) and a description of      |
| 33 |                 |     | study instruments (eg, questionnaires, laboratory tests) along with      |
| 34 |                 |     | their reliability and validity, if known. Reference to where data        |
| 35 |                 |     | collection forms can be found, if not in the protocol – Pages 9-11,      |
| 36 |                 |     | Supplementary file                                                       |
| 37 |                 |     |                                                                          |
| 38 |                 |     |                                                                          |
| 39 |                 | 18b | Plans to promote participant retention and complete follow-up,           |
| 40 |                 |     | including list of any outcome data to be collected for participants who  |
| 41 |                 |     | discontinue or deviate from intervention protocols – Page 12-13          |
| 42 |                 |     | (withdrawals)                                                            |
| 43 |                 |     |                                                                          |
| 44 |                 |     |                                                                          |
| 45 | Data            | 19  | Plans for data entry, coding, security, and storage, including any       |
| 46 | management      |     | related processes to promote data quality (eg, double data entry;        |
| 47 |                 |     | range checks for data values). Reference to where details of data        |
| 48 |                 |     | management procedures can be found, if not in the protocol – Page        |
| 49 |                 |     | 12                                                                       |
| 50 |                 |     |                                                                          |
| 51 |                 |     |                                                                          |
| 52 | Statistical     | 20a | Statistical methods for analysing primary and secondary outcomes.        |
| 53 | methods         |     | Reference to where other details of the statistical analysis plan can be |
| 54 |                 |     | found, if not in the protocol – Page 12-13                               |
| 55 |                 |     |                                                                          |
| 56 |                 | 20b | Methods for any additional analyses (eg, subgroup and adjusted           |
| 57 |                 |     | analyses) – n/A                                                          |
| 58 |                 |     |                                                                          |
| 59 |                 |     |                                                                          |
| 60 |                 |     |                                                                          |



- 1  
2  
3  
4  
5  
6  
7  
8  
9  
10  
11  
12  
13  
14  
15  
16  
17  
18  
19  
20  
21  
22  
23  
24  
25  
26  
27  
28  
29  
30  
31  
32  
33  
34  
35  
36  
37  
38  
39  
40  
41  
42  
43  
44  
45  
46  
47  
48  
49  
50  
51  
52  
53  
54  
55  
56  
57  
58  
59  
60
- 20c Definition of analysis population relating to protocol non-adherence (eg, as randomised analysis), and any statistical methods to handle missing data (eg, multiple imputation) – Page 12

### Methods: Monitoring

- Data monitoring 21a Composition of data monitoring committee (DMC); summary of its role and reporting structure; statement of whether it is independent from the sponsor and competing interests; and reference to where further details about its charter can be found, if not in the protocol. Alternatively, an explanation of why a DMC is not needed – N/A
- 21b Description of any interim analyses and stopping guidelines, including who will have access to these interim results and make the final decision to terminate the trial – N/A
- Harms 22 Plans for collecting, assessing, reporting, and managing solicited and spontaneously reported adverse events and other unintended effects of trial interventions or trial conduct – Page 14
- Auditing 23 Frequency and procedures for auditing trial conduct, if any, and whether the process will be independent from investigators and the sponsor – N/A

### Ethics and dissemination

- Research ethics approval 24 Plans for seeking research ethics committee/institutional review board (REC/IRB) approval – Pages 6 and 14
- Protocol amendments 25 Plans for communicating important protocol modifications (eg, changes to eligibility criteria, outcomes, analyses) to relevant parties (eg, investigators, REC/IRBs, trial participants, trial registries, journals, regulators) – N/A
- Consent or assent 26a Who will obtain informed consent or assent from potential trial participants or authorised surrogates, and how (see Item 32) – Page 7
- 26b Additional consent provisions for collection and use of participant data and biological specimens in ancillary studies, if applicable – N/A
- Confidentiality 27 How personal information about potential and enrolled participants will be collected, shared, and maintained in order to protect confidentiality before, during, and after the trial – Page 12
- Declaration of interests 28 Financial and other competing interests for principal investigators for the overall trial and each study site – Page 22
- Access to data 29 Statement of who will have access to the final trial dataset, and disclosure of contractual agreements that limit such access for investigators – Not present
- Ancillary and post-trial care 30 Provisions, if any, for ancillary and post-trial care, and for compensation to those who suffer harm from trial participation – N/A

|    |               |     |                                                                              |
|----|---------------|-----|------------------------------------------------------------------------------|
| 1  |               |     |                                                                              |
| 2  | Dissemination | 31a | Plans for investigators and sponsor to communicate trial results to          |
| 3  | policy        |     | participants, healthcare professionals, the public, and other relevant       |
| 4  |               |     | groups (eg, via publication, reporting in results databases, or other        |
| 5  |               |     | data sharing arrangements), including any publication restrictions –         |
| 6  |               |     | N/A                                                                          |
| 7  |               |     |                                                                              |
| 8  |               | 31b | Authorship eligibility guidelines and any intended use of professional       |
| 9  |               |     | writers – N/A                                                                |
| 10 |               |     |                                                                              |
| 11 |               | 31c | Plans, if any, for granting public access to the full protocol, participant- |
| 12 |               |     | level dataset, and statistical code – N/A                                    |
| 13 |               |     |                                                                              |
| 14 |               |     |                                                                              |

## Appendices

|    |                  |    |                                                                          |
|----|------------------|----|--------------------------------------------------------------------------|
| 15 |                  |    |                                                                          |
| 16 |                  |    |                                                                          |
| 17 | Informed consent | 32 | Model consent form and other related documentation given to              |
| 18 | materials        |    | participants and authorised surrogates – N/A                             |
| 19 |                  |    |                                                                          |
| 20 | Biological       | 33 | Plans for collection, laboratory evaluation, and storage of biological   |
| 21 | specimens        |    | specimens for genetic or molecular analysis in the current trial and for |
| 22 |                  |    | future use in ancillary studies, if applicable – N/A                     |
| 23 |                  |    |                                                                          |
| 24 |                  |    |                                                                          |

---

\*It is strongly recommended that this checklist be read in conjunction with the SPIRIT 2013 Explanation & Elaboration for important clarification on the items. Amendments to the protocol should be tracked and dated. The SPIRIT checklist is copyrighted by the SPIRIT Group under the Creative Commons "[Attribution-NonCommercial-NoDerivs 3.0 Unported](https://creativecommons.org/licenses/by-nc-nd/3.0/)" license.

# BMJ Open

## PREDICTORS OF PAIN REDUCTION FOLLOWING MANUAL THERAPY IN PATIENTS WITH TEMPOROMANDIBULAR DISORDERS: A PROTOCOL FOR A PROSPECTIVE OBSERVATIONAL STUDY

|                                 |                                                                                                                                                                                                                                                                                                                                                                                                                                                                                                                                                                                                                         |
|---------------------------------|-------------------------------------------------------------------------------------------------------------------------------------------------------------------------------------------------------------------------------------------------------------------------------------------------------------------------------------------------------------------------------------------------------------------------------------------------------------------------------------------------------------------------------------------------------------------------------------------------------------------------|
| Journal:                        | <i>BMJ Open</i>                                                                                                                                                                                                                                                                                                                                                                                                                                                                                                                                                                                                         |
| Manuscript ID                   | bmjopen-2019-032113.R2                                                                                                                                                                                                                                                                                                                                                                                                                                                                                                                                                                                                  |
| Article Type:                   | Protocol                                                                                                                                                                                                                                                                                                                                                                                                                                                                                                                                                                                                                |
| Date Submitted by the Author:   | 11-Oct-2019                                                                                                                                                                                                                                                                                                                                                                                                                                                                                                                                                                                                             |
| Complete List of Authors:       | Asquini, Giacomo; University of Birmingham, School of Sport, Exercise and Rehabilitation Sciences<br>Edoardo Bianchi , Andrea ; Italian Stomatologic Institute<br>Heneghan, Nicola; University of Birmingham, School of Sport, Exercise and Rehabilitation Sciences<br>Rushton, Alison; niversity of Birmingham, School of Health and Population Sciences, College of Medical and Dental Sciences<br>Borromeo, Giulia; Italian Stomatologic Institute<br>Locatelli , Matteo; IRCCS San Raffaele Scientific Institute<br>Falla, Deborah; University of Birmingham, School of Sport, Exercise and Rehabilitation Sciences |
| <b>Primary Subject Heading</b>: | Rehabilitation medicine                                                                                                                                                                                                                                                                                                                                                                                                                                                                                                                                                                                                 |
| Secondary Subject Heading:      | Dentistry and oral medicine                                                                                                                                                                                                                                                                                                                                                                                                                                                                                                                                                                                             |
| Keywords:                       | Temporomandibular Disorders, Temporomandibular Joint Dysfunction Syndrome, Pain, Prediction, Manual Therapy                                                                                                                                                                                                                                                                                                                                                                                                                                                                                                             |
|                                 |                                                                                                                                                                                                                                                                                                                                                                                                                                                                                                                                                                                                                         |

SCHOLARONE™  
Manuscripts

1  
2  
3  
4  
5  
6  
7  
8  
9  
10  
11  
12  
13  
14  
15  
16  
17  
18  
19  
20  
21  
22  
23  
24  
25  
26  
27  
28  
29  
30  
31  
32  
33  
34  
35  
36  
37  
38  
39  
40  
41  
42  
43  
44  
45  
46  
47  
48  
49  
50  
51  
52  
53  
54  
55  
56  
57  
58  
59  
60

**PREDICTORS OF PAIN REDUCTION FOLLOWING MANUAL THERAPY IN  
PATIENTS WITH TEMPOROMANDIBULAR DISORDERS:  
A PROTOCOL FOR A PROSPECTIVE OBSERVATIONAL STUDY**

Asquini G<sup>1,2</sup>, Edoardo Bianchi A<sup>2</sup>, Heneghan N<sup>1</sup>, Rushton A<sup>1</sup>, Borromeo G<sup>2</sup>, Locatelli M<sup>3</sup>,  
Falla D<sup>1</sup>

**Affiliations**

<sup>1</sup> Centre of Precision Rehabilitation for Spinal Pain (CPR Spine)  
School of Sport, Exercise and Rehabilitation Sciences  
College of Life and Environmental Sciences  
University of Birmingham  
Birmingham B15 2TT  
United Kingdom

<sup>2</sup> Italian Stomatologic Institute  
Cranio-mandibular Physiotherapy Service  
Via Pace 21, 20122 Milan  
Italy

<sup>3</sup> IRCCS San Raffaele Scientific Institute  
Via Olgettina Milano 60,  
20132 Milano,  
Italy

**Corresponding author:**

Deborah Falla

Centre of Precision Rehabilitation for Spinal Pain (CPR Spine)

School of Sport, Exercise and Rehabilitation Sciences

College of Life and Environmental Sciences

University of Birmingham

Birmingham, UK

E-mail: d.falla@bham.ac.uk

## ABSTRACT

### Introduction

Temporomandibular Disorders (TMD) are principally characterised by pain in the craniomandibular area and probable limitations of jaw opening. Manual therapy, like other recommended conservative treatments included in clinical guidelines, is commonly used to treat patients with TMD to reduce pain and improve function. However, outcomes may be variable. The aim of this study is to identify predictors associated with pain reduction in patients with TMD following manual therapy by analysing a combination of patient-reported outcome measures and clinical tests. Such knowledge will support a more personalised management approach by facilitating clinical decision-making.

### Methods/analysis

An observational prospective design will recruit a cohort of 100 adults with a diagnosis of TMD (according to Axis I of the Diagnostic Criteria for TMD) at a Dental Hospital in Italy. Patients will be treated with four weekly sessions of manual therapy applied to craniomandibular structures. An array of predictors has been chosen based on previous research on prognostic factors for TMD and altered pain modulation in musculoskeletal disorders. Candidate predictors including demographic variables, general health variables, psychosocial features, TMD characteristics, and clinical tests of the temporomandibular joint and masticatory muscles will be collected at baseline. Definition of good outcome is a clinically significant reduction of pain intensity over the last week ( $\geq 30\%$  reduction Visual Analogue Scale) immediately following the 4-week intervention. Exploratory factor analysis will be applied to analyse factor loading of candidate predictors for good outcome at 4 weeks. Subsequently, a logistic multivariable regression model will be performed to calculate low and high risk of good outcome.

### **Ethics and dissemination**

Ethical approval will be obtained from the “Fondazione IRCCS Ca’ Granda Ospedale Maggiore Policlinico” and University of Birmingham Ethics Committee. The results will be submitted for publication in a peer-reviewed journal and presented at conferences.

Keywords: Temporomandibular Disorders, Temporomandibular Joint Dysfunction Syndrome, Pain, Prediction, Manual Therapy

Word count: 3129 [excluding references]

### **STRENGTHS AND LIMITATIONS OF THIS STUDY**

- This will be the first study to identify predictors associated with pain reduction following manual therapy interventions in patients with TMD
- The study will utilise a comprehensive array of candidate factors to predict clinically relevant pain reduction
- The implications from this study will facilitate clinical decision-making for manual therapists managing patients with TMD
- Alternative or additional predictors could be valuable to include but the candidate predictors have been prioritised as they are reliable and valid measures which have a relationship with pain
- The study could potentially generate a non-representative sample of patients as it will exclude people who have already received recent treatment for their TMD

## INTRODUCTION

Temporomandibular Disorders (TMD) affect approximately 10% of the adult population and, in the USA alone, are estimated to cost US\$4 billion per year on management<sup>1-2</sup>. In Spain, the incidence of TMD has significantly increased (from 8% in 1993 to 14% in 2015) despite a clear improvement in general oral health over the entire period<sup>3</sup>. Although some countries report less prevalence of TMD such as in Sweden (approximately 5%)<sup>4</sup>, TMD remains a public health-related challenge. TMD are principally characterised by pain and limitations of jaw opening<sup>5</sup> but many patients also complain of neck and back pain or pain at other sites<sup>6</sup>.

Physical therapy is one of the most common conservative interventions for the management of TMD<sup>7</sup> and given that the aetiology may be unclear<sup>8</sup>, several therapeutic approaches have been described<sup>9</sup>. One approach is manual therapy applied to the craniomandibular structures with evidence suggesting a significant reduction in pain with manual therapy treatment<sup>10</sup>, although responses are highly variable<sup>11</sup>. In other musculoskeletal pain disorders, such as neck or back pain, pain reduction from manual therapy has been shown to be superior to other treatments (e.g. therapeutic exercise) when targeted towards patients with specific clinical features including the onset of symptoms within 30 days<sup>12-13</sup>. Nevertheless, in TMD, no previous study has investigated patient factors associated with significant pain reduction following manual therapy. Such knowledge could be achieved by identifying potential predictors (e.g. pain characteristics, psychosocial features, TMD characteristics) of pain reduction following manual therapy interventions in patients with TMD to support a more personalised management approach.

Very few studies have examined factors associated with pain reduction in patients with TMD. Forssell et al. conducted a prospective cohort study with 263 primary care

1  
2  
3 patients with TMD pain<sup>14</sup>. They analysed several potential predictors of persistent pain at  
4  
5 one-year follow-up including demographic, pain-related and psychosocial variables. It was  
6  
7 concluded that patients with TMD who have had numerous previous healthcare visits,  
8  
9 complained of high-intensity pain at other body sites and had a greater number of disability  
10  
11 days, were at greater risk of having pain one year after the initial assessment. Nevertheless,  
12  
13 this study did not examine predictors of pain reduction related to a therapeutic intervention  
14  
15 which could be useful to inform clinical practice. Kapos et al. investigated the association of  
16  
17 long-term pain intensity with baseline health-related quality of life and jaw functional  
18  
19 limitation in patients with TMD<sup>15</sup>. Findings suggested that baseline health-related quality of  
20  
21 life is inversely proportional with pain intensity at an eight-year follow-up regardless of the  
22  
23 type of treatment that they received (e.g. surgery, drugs, physical therapy or unconventional  
24  
25 therapy). After adjusting for the type of treatments received, by clustering the participants  
26  
27 into three groups (medical/conventional management, alternative medicine, and surgical  
28  
29 intervention), each predictor analysed (demographic, pain-related and health-related quality  
30  
31 of life) maintained similar statistical significance. Notwithstanding, the group classified as  
32  
33 “medical/ conventional management” included participants receiving diverse treatments  
34  
35 ranging from physical therapy, pharmacology (Acetaminophen, Antidepressants, Anti-  
36  
37 inflammatories) to the application of a mouth appliance (e.g. Michigan splint). This previous  
38  
39 work can facilitate clinicians to identify patients who are more challenging to treat by  
40  
41 identifying clinical features associated with persistent pain in the long term regardless of the  
42  
43 type of interventions applied. However, currently no study has examined predictive factors  
44  
45 associated with pain reduction following manual therapy interventions in patients with TMD.  
46  
47  
48  
49  
50  
51  
52  
53

54 The aim of this study is to identify predictors associated with pain reduction in  
55  
56 patients with TMD following manual therapy applied to craniomandibular structures by  
57  
58 analysing a combination of: (1) demographical variables, (2) general health variables, (3)  
59  
60



1  
2  
3 psychosocial features, (4) TMD characteristics, and (5) clinical tests of the  
4  
5 temporomandibular joint and masticatory muscles. The knowledge gained from this study  
6  
7 will facilitate clinical decision-making for manual therapists managing patients with TMD by  
8  
9 providing clinicians with key factors to evaluate, to determine whether or not the patient is  
10  
11 likely to have a clinically relevant reduction in their pain immediately following four weekly  
12  
13 applications of manual therapy.  
14  
15  
16  
17

## 18 19 **METHODS AND ANALYSIS**

### 20 21 **Source of data**

22  
23  
24  
25 A prospective observational study will recruit a cohort of patients referred to the  
26  
27 Italian Stomatologic Institute with a TMD diagnosis according to the Axis I of the Diagnostic  
28  
29 Criteria for TMDs (DC/TMD)<sup>16</sup>. This protocol is written according to the Transparent  
30  
31 Reporting of a multivariable prediction model for Individual Prognosis or Diagnosis  
32  
33 (TRIPOD) statement<sup>17</sup> in which recommendations are provided about prediction model  
34  
35 development and validation. Ethical clearance will be obtained from the Ethics Committee of  
36  
37 the Fondazione IRCCS Ca' Granda Ospedale Maggiore Policlinico, and the University of  
38  
39 Birmingham Ethics Committee, and the study will be conducted in accordance with the  
40  
41 Declaration of Helsinki.  
42  
43  
44  
45  
46

47 Patient reported and physical assessment data will be collected at baseline prior to  
48  
49 commencing treatment. Outcome will be collected at the end of the fourth session of  
50  
51 craniomandibular manual therapy (at one month). This timeline has been selected based on  
52  
53 previous studies investigating 1) the effects of manual therapy on pain<sup>18-19</sup>; and 2) work  
54  
55 confirming the effectiveness of manual therapy for TMD patients<sup>20</sup> and is believed to be  
56  
57 reasonable for the purposes of this study.  
58  
59  
60

## Setting and Participants

Participant recruitment will be carried out at the TMJ Unit of the Italian Stomatological Institute (Dental Hospital) in Milan, Italy over a period of up to 12 months (planned start date July 2019). Consecutive eligible participants will be approached for recruitment until the sample size is reached.

### *Eligibility criteria*

Inclusion criteria: (1) adults aged  $\geq 18$  years; (2) TMD diagnosis according to the Diagnostic Criteria for TMDs (DC/TMD)<sup>16</sup>; (3) no therapeutic interventions reported (for their TMD) in the past six months<sup>21</sup>; (4) capacity to use and understand written and verbal Italian language; (5) mental capacity to provide informed consent.

Exclusion criteria: (1) TMD pain related to rheumatoid/inflammatory arthritis (2) any physical (e.g. facial paralysis, neurological disorders, neuropathic pain) or mental condition (e.g. cognitive deficit, mental illness and/or disorders) that could potentially influence the study results. Additionally, patients will be excluded if (3) they commence another treatment for their TMD (pharmacology, oral appliance, others) throughout the duration of the study.

## Recruitment

Based on feasibility data from the last 5 years of activity at the TMJ Unit of Italian Stomatologic Institute, it is estimated that at least 130 eligible participants will be available for recruitment over 13 months. According to previous observational studies on the prediction of outcomes in musculoskeletal disorders<sup>12-13</sup>, it is estimated that 75% of eligible participants will consent to participation [100 participants].

All patients attending the TMJ Unit will be screened for the presence of a TMD. One expert dentist with >10 years' experience in the management of patients with TMD, will confirm the TMD diagnosis according to the DC/TMD using the Italian translation of the

1  
2  
3 protocol<sup>22</sup>. Subsequently, in accordance with the inclusion/exclusion criteria, he will explain  
4 the study to the potential participant and provide the patient information sheet. Participants  
5 will then give their written informed consent prior to inclusion in the study. Afterwards, the  
6 participant will be referred to see a physiotherapist [independent assessor, >5 years'  
7 experience in managing patients with TMD] for the baseline assessments (summarised in  
8 Table 1) and then treatment will commence within the same week. After the last session (i.e.  
9 one month from baseline), the participants will be assessed again by the assessing  
10 physiotherapist to measure outcome. Participant flow through the study is outlined in Figure  
11  
12  
13  
14  
15  
16  
17  
18  
19  
20  
21  
22 1.

23  
24  
25  
26 [FIGURE 1]  
27  
28  
29

### 30 31 **Treatment**

32  
33 Participants will receive four sessions of manual therapy applied to craniomandibular  
34 structures over 4 weeks<sup>23-25</sup>. Two physiotherapists, each with >5 years' experience in manual  
35 therapy / TMD will perform the treatments. They will not be involved in participant  
36 recruitment, assessment or the collection of the outcome measure. Manual therapy techniques  
37 will be based on the clinical examination, and will be selected at the discretion of the treating  
38 physiotherapist according to their clinical reasoning of the individual case. Overall, the  
39 application of manual therapy aims to decrease pain by treating masticatory muscle trigger  
40 points, muscle tightness, and restricted temporomandibular joint movements. Several  
41 techniques will be considered including: (i) ventral and caudal anterior glide  
42 temporomandibular joint mobilization<sup>26</sup>; (ii) soft tissue interventions for the management of  
43 trigger points in masticatory muscles<sup>27</sup>; (iii) myofascial induction therapy [functional  
44 restoration of the fascial system] applied to craniomandibular structures<sup>28</sup>.  
45  
46  
47  
48  
49  
50  
51  
52  
53  
54  
55  
56  
57  
58  
59  
60

1  
2  
3 The structures targeted in the treatment sessions will be the temporomandibular joint,  
4 temporal muscles, masseter muscles, medial and lateral pterygoid muscles and suprahyoid  
5 muscles, applied at the discretion of the physiotherapist based on the patient's individual  
6 presentation. During the treatment sessions, the treating physiotherapists will provide  
7 explanations about the patient's condition and answer any participant questions by promoting  
8 general advice. The treatment sessions will last from 20 to 30 minutes duration. No other  
9 treatment (e.g. oral appliance) will be performed for the management of their TMD. If during  
10 the course of the four-week intervention, a patient seeks treatment for an acute episode of  
11 pain at another site (e.g. neck pain, low back pain, shoulder pain) they will be withdrawn  
12 from the study.  
13  
14  
15  
16  
17  
18  
19  
20  
21  
22  
23  
24  
25  
26  
27

## 28 **Outcome**

29  
30 The outcome being predicted by the prediction model is pain intensity since patients  
31 with TMD typically report pain to be their primary problem<sup>5</sup>, manual therapy is largely  
32 known to be effective principally for pain modulation<sup>29</sup> and change in pain intensity has most  
33 commonly been the primary outcome of choice in several other studies of patients with  
34 TMD<sup>30-33</sup>.  
35  
36  
37  
38  
39  
40  
41

42 Pain intensity will be calculated by averaging the ratings of current pain, average pain  
43 in the past week, and worst pain in the past week using the Visual Analogue Scale (VAS),  
44 consisting of a horizontal line measuring 10 cm (without marks), with "no pain" written at the  
45 left extremity, and "worst pain imaginable" at the right extremity<sup>34</sup>. The VAS is a reliable and  
46 valid scale to assess pain intensity as an outcome measure in intervention studies<sup>35</sup>. Based on  
47 the Initiative on Methods, Measurement, and Pain Assessment in Clinical Trials (IMMPACT)  
48 recommendations about TMD reviewed by Haythornthwaite<sup>36</sup>, a reduction of at least 30% of  
49 the VAS score for pain intensity is considered clinically significant. Consequently, a  
50  
51  
52  
53  
54  
55  
56  
57  
58  
59  
60

reduction in the total VAS score [ $\geq 30\%$ ] will be defined as a good outcome. The outcome measure will be evaluated by the same independent assessor to minimise detection bias<sup>37</sup>.

To capture a potential change in function which may occur with a change in pain intensity, patients will also complete the patient specific functional scale [PSFS]<sup>38</sup> pre and post treatment. The PSFS is a self-reported outcome measure assessing functional change in patients with musculoskeletal disorders<sup>39-40</sup>. It is responsive to clinically significant change over time<sup>41</sup>. Patients will be invited to rate, on an 11-point scale, their level of difficulty performing at least three different daily activities. Following the treatment, patients will be required to score again the activities previously rated. The PSFS is a valid, reliable, and responsive outcome measure with a high test-retest reliability in different musculoskeletal disorders such as low back and neck pain<sup>42-44</sup>.

### Candidate predictors

The candidate predictors that have been chosen are reliable and valid measures which have a relationship with pain. The selection is based on previous research on prognostic factors for TMD and altered pain modulation in musculoskeletal disorders<sup>45-46</sup>. Candidate predictors are summarised in Table 1, with further detail in Supplementary file S1. All data collection will be standardised through protocols and clinical report forms.

**Table 1: Summary of candidate predictors.**

| <b>Domain / Candidate predictor</b> | <b>Measure / data item</b>                                             |
|-------------------------------------|------------------------------------------------------------------------|
| <b>Demographical variables</b>      |                                                                        |
| Age                                 | Years                                                                  |
| Gender                              | Female / male                                                          |
| Education                           | Basic education, intermediate education and university-level education |

| <b>General health variables</b>                       |                                                                                                                                                                                                                                                                                                                                          |
|-------------------------------------------------------|------------------------------------------------------------------------------------------------------------------------------------------------------------------------------------------------------------------------------------------------------------------------------------------------------------------------------------------|
| Health-related quality of life                        | EuroQol EQ-5D-5L <sup>47</sup>                                                                                                                                                                                                                                                                                                           |
| Sleep quality                                         | 11-point [0-10] Numerical Rating Scales, relating to current pain, from 'best possible sleep' to 'worst possible sleep' <sup>48</sup>                                                                                                                                                                                                    |
| <b>Psychosocial features</b>                          |                                                                                                                                                                                                                                                                                                                                          |
| Coping strategies applied during a painful experience | Coping Strategies Questionnaire 27 [CSQ-27] <sup>49</sup>                                                                                                                                                                                                                                                                                |
| Anxiety and depression                                | Hospital Anxiety and Depression Scales [HADS] <sup>50</sup>                                                                                                                                                                                                                                                                              |
| Treatment expectation                                 | Positive / negative expectation <sup>51</sup>                                                                                                                                                                                                                                                                                            |
| <b>TMD characteristics</b>                            |                                                                                                                                                                                                                                                                                                                                          |
| Pain duration                                         | Days                                                                                                                                                                                                                                                                                                                                     |
| Pain intensity                                        | VAS: averaging ratings of current pain, average pain, and worst pain in the past week <sup>52</sup>                                                                                                                                                                                                                                      |
| Pain location                                         | Pain drawing as described in the protocol of Diagnostic Criteria for TMD (DC/TMD) <sup>16</sup>                                                                                                                                                                                                                                          |
| Central sensitization                                 | Central Sensitization Inventory (CS) <sup>53</sup>                                                                                                                                                                                                                                                                                       |
| Classification of TMD                                 | In according to DC/TMD Taxonomy <sup>54</sup>                                                                                                                                                                                                                                                                                            |
| Oral Behaviours                                       | Oral Behaviours Checklist [OBC] <sup>55</sup>                                                                                                                                                                                                                                                                                            |
| Characteristic pain intensity and disability          | Graded Chronic Pain Scale (GCPS) version 2.0 [Italian version - <a href="http://www.rdc-tmdinternational.org">www.rdc-tmdinternational.org</a> ]                                                                                                                                                                                         |
| <b>TMJ and masticatory muscles clinical test</b>      |                                                                                                                                                                                                                                                                                                                                          |
| TMJ range of motion                                   | Maximal Mouth Opening (MMO) without pain measured in mm through a ruler as described in the DC/TMD protocol <sup>16</sup>                                                                                                                                                                                                                |
| TMJ palpation pain                                    | Dynamic TMJ lateral pole palpation [1 kg of palpation pressure] in according to DC/TMD protocol <sup>16</sup><br>Score range: 0-1 [no pain =0; pain = 1]                                                                                                                                                                                 |
| Muscle palpation pain                                 | Palpation in the following 6 bilateral points: lateral pterygoid area [0.5 kg intraoral palpation], temporalis tendon [0.5 kg intraoral palpation], masseter muscle [1 kg extraoral palpation] as described in the DC/TMD protocol <sup>16</sup> . Score range: 0–1 [< 3 sites with familiar pain = 0; ≥ 3 sites with familiar pain = 1] |
| JAw-test                                              | Immediate effects of brief intraoral MT techniques on pain [VRS] and TMJ range of motion [MMO]. A standardised procedure is fully described in Supplementary file S1.<br>Score range 0-2: [0 = no change; 1 = pain improvement or MMO improvement; 2 = improvement of both]                                                              |

## Data handling

Candidate predictors will be collected by independent physiotherapist assessor. All data will be confidentially secured by storing it on a password-protected computer attainable only by the principal investigators (GA). All individual details will be replaced with ID codes. At the end of the data collection, all data stored on the principal investigator's computer will be transferred securely to a server at the Centre of Precision Rehabilitation for Spinal Pain at Birmingham University where the data will be analysed. All data will be stored on a secure server at the University of Birmingham for a period of 10-years in line with Research Governance procedures. Data will be analysed using IBM SPSS Statistics (Version 25, IBM).

## Sample Size

Exploratory factor analysis will be utilised to reduce the number of predictors<sup>56</sup>. This method will guarantee an adequate sample size (at least 10 cases per candidate predictor) to power the final regression analysis<sup>57-58</sup>. Data will be collected for a sample size of 100 participants so that, considering 10% of potential drops out, final data are available for 90 participants.

## Statistical analysis methods

A flow diagram will report eligible participants, examined for eligibility, confirmed eligible, recruited into the study, completed follow-up and analysed. Reasons for non-participation, exclusion, drop-outs and withdrawal will be fully documented and all missing data of participants will be reported. Participant characteristics (candidate predictors - Table 1) will be summarised with a descriptive method.

A primary phase of the exploratory data analysis will summarise data to implement the predictive model<sup>59</sup>. Multicollinearity between candidate predictors will be assessed at baseline. Outcome [VAS pain intensity] will be split into good versus poor as described previously [good outcome: reduction in VAS score  $\geq 30\%$ ]<sup>36</sup>. Exploratory factor analysis will be applied to

1  
2  
3 analyse factor loading of candidate predictors (summary scores) on good outcome at one  
4 month. This process will reduce candidate predictors (supported by the cohort sample of 90) to  
5 enter into the final model.  
6  
7  
8  
9

10 The statistical model has been designed a priori. To investigate the impact of each  
11 predictive factor on good outcome, a logistic multivariable regression model will be performed.  
12 For each candidate predictor, the mean differences or the odds ratio with their 95% confidence  
13 intervals will be calculated. A multiple imputation analysis<sup>60</sup> will be applied to manage possible  
14 missing data. The multivariable analysis will initially consider all candidate predictors. In the  
15 case of a high correlation between candidate predictors, a reduced multivariate analysis will be  
16 considered.  
17  
18  
19  
20  
21  
22  
23  
24  
25  
26  
27

## 28 **DISCUSSION**

29  
30 There is a need to identify predictors for pain reduction in patients with TMD following  
31 specific treatments in order to inform clinical decision-making. Several therapies are described  
32 for patients with TMD such as the use of oral appliances, different types of physical therapy  
33 modalities, pharmacology or temporomandibular joint arthrocentesis yet the amount of pain  
34 relief that different people receive from each intervention is variable<sup>7,10</sup>. As shown by Forssell  
35 et al.<sup>14</sup> and Kapos et al.<sup>15</sup>, many patients continue to experience pain following such  
36 interventions. Investigating factors associated with pain relief to such treatments can facilitate  
37 clinical assessment and treatment selection.  
38  
39  
40  
41  
42  
43  
44  
45  
46  
47  
48

49 Physical therapy is one of the most common conservative interventions to treat TMD<sup>7</sup>.  
50 Among different physical therapy modalities, manual therapy can provide symptom and  
51 functional improvements<sup>10</sup> including pain relief<sup>11,31</sup>. Knowledge of predictive factors  
52 associated with good outcome to a specific intervention such as manual therapy applied to  
53  
54  
55  
56  
57  
58  
59  
60



1  
2  
3 craniomandibular structures will facilitate clinical decision making. Ultimately, such  
4  
5 knowledge will lead to improved clinical and cost effectiveness of rehabilitation approaches.  
6  
7

### 8 **Quality assurance**

9  
10 Only participants that have not received therapeutic intervention for their TMD in the  
11  
12 past six months will be included in the current study. It is possible that such eligibility criteria  
13  
14 could generate selection bias. To address this potential bias, the number of eligible and included  
15  
16 subjects with the reason for non-participation will be documented.  
17  
18

### 19 **Patient and Public Involvement**

20  
21 The research question in this study was developed following consultations and  
22  
23 discussion with patients. Patients will not be involved in the analysis and data collection but  
24  
25 will contribute to data interpretation and production of a lay summary of the findings.  
26  
27

### 28 **Ethics and Dissemination**

29  
30 The research protocol has been submitted to the Ethics Committee of the “Fondazione  
31  
32 IRCCS Ca’ Granda Ospedale Maggiore Policlinico” and subsequently will be submitted to the  
33  
34 University of Birmingham Ethics Committee for approval. Researchers will inform all  
35  
36 participants on the characteristics of the research and will obtain written consent. Participants  
37  
38 will be informed that they are free to withdraw from the study at any time, without needing to  
39  
40 provide reason. Any concerns for a participant by the study team will be fed back to the primary  
41  
42 investigator (GA). Baseline characteristics of withdrawn participants will be compared to those  
43  
44 of retained participants to assess for any differences. In the event of any unlikely adverse  
45  
46 events, this will be immediately reported by the principal investigator to the ethics committee.  
47  
48  
49

50  
51 The results of this study will submitted for publication in a peer review journal and  
52  
53 presented at conferences.  
54  
55  
56  
57  
58  
59  
60

### Limitations

The study could potentially generate a non-representative sample of patients with TMD due to a possible selection bias. Subjects reporting other treatments before [6 months] and during the study will be excluded to minimise confounding bias and preserve internal validity. This could potentially generate a non representative sample of TMDs because of exclusion of patients with high levels of pain which seek additional treatment. This potential event, associated with the fact that this observational study will be performed at a single site only, could reduce the external validity and the generalisability of the results.

### Conclusion

This protocol paper describes what will be the first study to identify factors associated with pain reduction following manual therapy in patients with TMD. It is anticipated that the knowledge gained from the study described within this protocol, will facilitate clinical decision making for manual therapists managing patients with TMD.

## REFERENCES

1. Lipton JA, Ship JA, Larach-Robinson D. Estimated prevalence and distribution of reported orofacial pain in United States. *J Am Dent Assoc.* 1993;124:115-112.
2. NIDCR. Facial Pain (2014). *National Institute of Health* [Online]. <http://www.nidcr.nih.gov/DataStatistics/FindDataByTopic/FacialPain/> [Accessed Dec 28 2018]
3. Adèrn B, Minston A, Nohlert E, Tegelberg Å. Self-reportance of temporomandibular disorders in adult patients attending general dental practice in Sweden from 2011 to 2013. *Acta Odontol Scand.* 2018;76(7):530-534.
4. Montero J, Llodra JC, Bravo M. Prevalence of the Signs and Symptoms of Temporomandibular Disorders Among Spanish Adults and Seniors According to Five National Surveys Performed Between 1993 and 2015. *J Oral Facial Pain Headache.* 2018;32(4):349-357.
5. De Leeuw R, Klasser GD. *Orofacial pain guidelines for assessment, diagnosis, and management.* 5th ed. Hanover park, II: Quintessence publishing; 2013.
6. Plesh O, Adams SH, Gansky SA. Temporomandibular joint and muscle disorders-type pain and comorbid pains in a national US sample. *J Orofacial Pain.* 2011;25: 190-198.
7. Calixtre LB, Grüniger BL, Haik MN, Albuquerque-Sendin F, Oliveira AB. Effects of cervical mobilization and exercise on pain, movement and function in subjects with temporomandibular disorders: a single group pre-post test. *Journal of Applied Oral Science.* 2016;24(3):188–197.
8. Slade GD, Bair E, Greenspan JD, Dubner R, Fillingim RB, Diatchenko L, Maixner W, Knott C, Ohrbach R. Signs and symptoms of first-onset TMD and sociodemographic predictors of its development: the OPPERA prospective cohort study. *J Pain.* 2013;14:T20-T32
9. Coskun Benlidayi I, Salimov F, Kurkcu M, Guzel R. Kinesio-Taping for temporomandibular Disorders: Single-blind, randomized, controlled trial of effectiveness. *J Back Musculoskeletal Rehabil.* 2016; 29:373-380.
10. Armijo-Olivo S, Pitance L, Singh V, Neto F, Thie N, Michelotti A. Effectiveness of Manual Therapy and Therapeutic Exercise for Temporomandibular Disorders: Systematic Review and Meta-Analysis. *Physical Therapy.* 2016; 96(1): 9–25.
11. Kalamir A, Graham PL, Vitiello AL, Bonello R, Pollard H. Intra-oral myofascial therapy versus education and self-care in the treatment of chronic, myogenous temporomandibular disorder: A randomised, clinical trial. *Chiropractic and Manual Therapies.* 2013; 21(1):17.
12. Cleland JA, Childs JD, Fritz JM, Whitman JM, Eberhart SL. Development of a Clinical Prediction Rule for Guiding Treatment of a Subgroup of Patients With Neck Pain: Use of Thoracic Spine Manipulation, Exercise, and Patient Education. *Physical Therapy.* 2007; 87(1): 9–23.

13. Flynn T, Fritz J, Whitman J, Wainner R, Magel J, Rendeiro D, Butler B, Garber M, Allison S. A clinical prediction rule for classifying patients with low back pain who demonstrate short-term improvement with spinal manipulation. *Spine*; 2002; 27(24):2835-2843.
14. Forssell H, Kauko T, Kotiranta U, Suvinen T. Predictors for future clinically significant pain in patients with temporomandibular disorder: A prospective cohort study. *European Journal of Pain*. 2017; 21(1):188–197.
15. Kapos FP, Look JO, Zhang L, Hodges JS, Schiffman EL. Predictors of Long-Term Temporomandibular Disorder Pain Intensity: An 8-Year Cohort Study. *Journal of Oral & Facial Pain and Headache*. 2018; 32(2):113–122.
16. Schiffman E, Ohrbach R, Truelove E, Look J, Anderson G, Goulet JP, List T, Svensson P, Gonzalez Y, Lobbezoo F, Michelotti A, Brooks SL, Ceusters W, Drangsholt M, Ettlin D, Gaul C, Goldberg LJ, Haythornthwaite JA, Hollender L, Jensen R, John MT, De Laat A, de Leeuw R, Maixner W, van der Meulen M, Murray GM, Nixdorf DR, Palla S, Petersson A, Pionchon P, Smith B, Visscher CM, Zakrzewska J, Dworkin SF; International RDC/TMD Consortium Network, International association for Dental Research; Orofacial Pain Special Interest Group, International Association for the Study of Pain. Diagnostic Criteria for Temporomandibular Disorders (DC/TMD) for Clinical and Research Applications: recommendations of the International RDC/TMD Consortium Network and Orofacial Pain Special Interest Group. *J Oral Facial Pain Headache*. 2014; 28(1):6-27.
17. Collins GS, Reitsma JB, Altman DG, Moons KG. Transparent reporting of a multivariable prediction model for individual prognosis or diagnosis (TRIPOD): the TRIPOD statement'. *BMC Medicine*. 2015; 350:g7594
18. Bishop MD, Torres-Cueco R, Gay CW, Lluch-Girbés E, Beneciuk JM, Bialosky JE. What effect can manual therapy have on a patient's pain experience?. *Pain management*. 2015; 5(6):455-64.
19. Vigotsky AD, Bruhns RP. Corrigendum to "The Role of Descending Modulation in Manual Therapy and Its Analgesic Implications: A Narrative Review". *Pain Res Treat*. 2017; 1535473.
20. Calixtre LB, Moreira RFC, Franchini GH, Albuquerque-Sendín F, Oliveira A.B. Manual therapy for the management of pain and limited range of motion in subjects with signs and symptoms of temporomandibular disorder: A systematic review of randomised controlled trials. *Journal of Oral Rehabilitation*. 2015; 42(11):847–861.
21. Wahlund K, Nilsson IM, Larsson B. Treating temporomandibular disorders in adolescents: a randomized, controlled, sequential comparison of relaxation training and occlusal appliance therapy. *J Oral Facial Pain Headache*. 2015; 29(1):41-50.
22. Ohrbach R, editor. Diagnostic Criteria for Temporomandibular Disorders: Assessment Instruments. Version 15May2016. [Criteri diagnostici per i disordini temporomandibolari: Strumenti valutativi (DC/TMD) Version 17Jan2017] Michelotti A., Segù M., Wrenn C., Rongo R. Trans. [www.rdc-tmdinternational.org](http://www.rdc-tmdinternational.org) Accessed on <31 Mar 2019>.

- 1  
2  
3 23. Crockett DJ, Foreman ME, Alden L, Blasberg B. A comparison of treatment modes in the  
4 management of myofascial pain dysfunction syndrome. *Biofeedback and self-regulation*. 1986;  
5 11(4):279-291.  
6  
7  
8 24. Guarda-Nardini L, Stecco A, Stecco C, Masiero S, Manfredini D. Myofascial Pain of the Jaw  
9 Muscles: Comparison of Short-Term Effectiveness of Botulinum Toxin Injections and Fascial  
10 Manipulation Technique. *CRANIO*. 2012; 30(2):95–102.  
11  
12 25. Nascimento M, Vasconcelos BC, Porto GG, Ferdinanda G, Nogueira CM, Raimundo RD.  
13 Physical therapy and anesthetic blockage for treating temporomandibular disorders: a clinical  
14 trial. *Med Oral Patol Oral Cir Bucal*. 2013; 18(1):81-5.  
15  
16  
17 26. Cleland J, Palmer J. Effectiveness of Manual Physical Therapy, Therapeutic Exercise, and  
18 Patient Education on Bilateral Disc Displacement Without Reduction of the  
19 Temporomandibular Joint: A Single-Case Design. *Journal of Orthopaedic & Sports Physical*  
20 *Therapy*. 2004; 34(9):535–548.  
21  
22  
23 27. Miernik M, Wieckiewicz M, Paradowska A. Massage therapy in myofascial TMD pain  
24 management. *Adv Clin Exp Med*. 2012; 21(5):681-5.  
25  
26  
27 28. Fernandez-de-las-Pena C, Mesa-Jimenez J. *Temporomandibular Disorders: manual Therapy,*  
28 *exercise and needling*. United Kingdom: Handspring Publishing; 2018  
29  
30 29. Bialosky JE, Bishop MD, Price DD, Robinson ME, George SZ. The mechanisms of manual  
31 therapy in the treatment of musculoskeletal pain: a comprehensive model. *Man Ther*. 2009;  
32 14:531–538.  
33  
34  
35 30. Kalamir A, Pollard H, Vitiello A, Bonello R. Intra-oral myofascial therapy for chronic  
36 myogenous temporomandibular disorders: a randomized, controlled pilot study. *Journal of*  
37 *Manual & Manipulative Therapy*, 2010; 18(3):39–146.  
38  
39 31. Gomes CA, Politti F, Andrade DV, de Sousa DF, Herpich CM, Dibai-Filho AV, Gonzalez TO,  
40 Biasotto-Gonzalez DA. Effects of Massage Therapy and Occlusal Splint Therapy on  
41 Mandibular Range of Motion in Individuals With Temporomandibular Disorder: A  
42 Randomized Clinical Trial. *Journal of Manipulative and Physiological Therapeutics*. 2014;  
43 37(3):164–169.  
44  
45  
46 32. Tuncer AB, Ergun N, Tuncer AH, Karahan S. Effectiveness of manual therapy and home  
47 physical therapy in patients with temporomandibular disorders: A randomized controlled trial.  
48 *Journal of Bodywork and Movement Therapies*. 2013; 17(3):302–308.  
49  
50  
51 33. von Piekartz H, Hall T. Orofacial manual therapy improves cervical movement impairment  
52 associated with headache and features of temporomandibular dysfunction: A randomized  
53 controlled trial. *Manual Therapy*. 2013; 18(4):345-50.  
54  
55 34. Haefeli M, Elfering A. ‘Pain assessment: official publication of the European Spine Society,  
56 the European Spinal Deformity Society, and the European Section of the Cervical Spine  
57 Research Society. *European spine journal*. 2005; 15:S17–S24.  
58  
59  
60

35. Dworkin RH, Turk DC, Farrar JT, Haythornthwaite JA, Jensen MP, Katz NP, Witter J. Core outcome measures for chronic pain clinical trials : IMMPACT recommendations. *Pain*. 2005; 113:9–19.
36. Haythornthwaite JA. IMMPACT recommendations for clinical trials: Opportunities for the RDC/TMD. *Journal of Oral Rehabilitation*. 2010; 37(10):799–806.
37. Higgins JP, Altman DG, Gøtzsche PC, Jüni P, Moher D, Oxman AD, Savovic J, Schulz KF, Weeks L, Sterne JA; Cochrane Bias Methods Group; Cochrane Statistical Methods Group. The Cochrane Collaboration's tool for assessing risk of bias in randomised trials. *BMJ*. 2011 Oct 18;343:d5928.
38. Stratford P, Gill C, Westaway M, Binkley J. Assessing disability and change on individual patients: a report of a patient specific measure. *Physiotherapy Canada*. 1995; 47:258-263.
39. Horn KK, Jennings S, Richardson G, Van Vliet D, Hefford C, Abbott JH. The patient-specific functional scale: psychometrics, clinimetrics, and application as a clinical outcome measure. *Journal of orthopaedic & sports physical therapy*. 2012; 42(1):30-D17.
40. Abbott JH, Schmitt J. Minimum important differences for the patient-specific functional scale, 4 region-specific outcome measures, and the numeric pain rating scale. *Journal of Orthopaedic & Sports Physical Therapy*. 2014; 44(8):560-4.
41. Maughan EF, Lewis JS. Outcome measures in chronic low back pain. *European Spine Journal*. 2010; 19(9):1484-94.
42. Hefford C, Abbott JH, Arnold R, Baxter GD. The patient-specific functional scale: validity, reliability, and responsiveness in patients with upper extremity musculoskeletal problems. *Journal of orthopaedic & sports physical therapy*. 2012; 42(2):56-65.
43. Westawa MD, Stratford PW, Binkley JM. The patient-specific functional scale: validation of its use in persons with neck dysfunction. *Journal of Orthopaedic & Sports Physical Therapy*. 1998; 27(5):331-8.
44. Chatman AB, Hyams SP, Neel JM, Binkley JM, Stratford PW, Schomberg A, Stabler M. The Patient-Specific Functional Scale: measurement properties in patients with knee dysfunction. *Physical therapy*. 1997; 77(8):820-9.
45. Bair E, Gaynor S, Slade GD, Ohrbach R, Fillingim RB, Greenspan JD, Dubner R, Smith SB, Diatchenko L, Maixner W. Identification of clusters of individuals relevant to temporomandibular disorders and other chronic pain conditions: the OPPERA study. *Pain*. 2016; 157(6):1266-78.
46. Clark J, Nijs J, Yeowell G, Goodwin PC. What Are the Predictors of Altered Central Pain Modulation in Chronic Musculoskeletal Pain Populations? A Systematic Review. *Pain Physician*. 2017; 20(6):487-500.
47. Brooks R. EuroQol: the current state of play. *Health Policy*. 1996; 37(1):53-72.



- 1  
2  
3  
4  
5  
6  
7  
8  
9  
10  
11  
12  
13  
14  
15  
16  
17  
18  
19  
20  
21  
22  
23  
24  
25  
26  
27  
28  
29  
30  
31  
32  
33  
34  
35  
36  
37  
38  
39  
40  
41  
42  
43  
44  
45  
46  
47  
48  
49  
50  
51  
52  
53  
54  
55  
56  
57  
58  
59  
60
48. Cappelleri JC, McDermott AM, Sadosky AB, Petrie C.D, Martin S. Psychometric properties of a single-item scale to assess sleep quality among individuals with fibromyalgia. *Health Qual Life Outcomes*. 2009; 17(7):54.
  49. Monticone M, Ferrante S, Giorgi I, Galandra C, Rocca B, Foti C. The 27-item coping strategies questionnaire-revised: confirmatory factor analysis, reliability and validity in Italian-speaking subjects with chronic pain. *Pain Res Manag*. 2014; 19(3):153-8.
  50. Zigmond AS, Snaith RP. The hospital anxiety and depression scale. *Acta Psychiatr Scand*. 1983; 67(6):361-70.
  51. Puentedura EJ, Cleland JA, Landers MR, Mintken PE, Louw A, Fernández-de-Las-Peñas C. Development of a clinical prediction rule to identify patients with neck pain likely to benefit from thrust joint manipulation to the cervical spine. *J Orthop Sports Phys Ther*. 2012; 42(7):577-92.
  52. Davis CE, Stockstill JW, Stanley WD, Wu Q. Pain-related worry in patients with chronic orofacial pain. *J Am Dent Assoc*. 2014; 145(7):722-30.
  53. Mayer TG, Neblett R, Cohen H, Howard KJ, Choi YH, Williams MJ, Gatchel RJ. The Development and Psychometric Validation of the Central Sensitization Inventory. *Pain Practise*. 2012; 12(4):276–285.
  54. Peck CC, Goulet JP, Lobbezoo F, Schiffman EL, Alstergren P, Anderson GC, de Leeuw R, Jensen R, Michelotti A, Ohrbach R, Petersson A, List T. Expanding the taxonomy of the diagnostic criteria for temporomandibular disorders. *J Oral Rehabil*. 2011; 41(1):2-23.
  55. Ohrbach R, Michael RM, Willard DM. Waking-state oral parafunctional behaviors: specificity and validity as assessed by electromyography. *European Journal of Oral Sciences*. 2008; 116:438-444.
  56. Fabrigar LR, Wegener DT, MacCallum RC, Strahan EJ. Evaluating the use of exploratory factor analysis in psychological research. *Psychological Methods*. 1998; 4:272–299.
  57. Peduzzi P, Concato J, Kemper E, Holford TR, Feinstein AR. A simulation study of the number of events per variable in logistic regression analysis. *J Clin Epidemiol*. 1996; 49(12):1373-9.
  58. Vittinghoff E, McCulloch CE. Relaxing the rule of ten events per variable in logistic and Cox regression. *Am J Epidemiol*. 2007; 165(6):710-8.
  59. Shmueli G. To explain or to predict?. *Statistical Science*. 2010; 25(3):289-310.
  60. Sterne JA, White IR, Carlin JB, Spratt M, Royston P, Kenward MG, Wood AM, Carpenter JR. Multiple imputation for missing data in epidemiological and clinical research: potential and pitfalls. *BMJ*. 2009; 338:b2393.

### **Author Contributions**

GA, AEB and DF formulated the research question and study focus. GA drafted the initial version of the manuscript with DF. NH, AR, GB and ML provided guidance on topic, methodology and analyses. All authors reviewed and commented on each draft of the protocol. All authors have approved the final manuscript. DF is guarantor

### **Funding Statement**

This research received no specific grant from any funding agency in the public, commercial or not-for-profit sectors.

### **Competing Interests Statement**

The authors have no competing interests to report.

### **Data sharing statement**

No additional data are available.

## **FIGURE LEGEND**

**Figure 1:** Participant flow through the study





1  
2  
3  
4  
5  
6  
7  
8  
9  
10  
11  
12  
13  
14  
15  
16  
17  
18  
19  
20  
21  
22  
23  
24  
25  
26  
27  
28  
29  
30  
31  
32  
33  
34  
35  
36  
37  
38  
39  
40  
41

1  
2  
3 **PREDICTORS OF PAIN REDUCTION FOLLOWING MANUAL THERAPY IN**  
4 **PATIENTS WITH TEMPOROMANDIBULAR DISORDERS:**  
5 **A PROTOCOL FOR A PROSPECTIVE OBSERVATIONAL STUDY**  
6  
7  
8  
9  
10

11 **Supplementary file 1 - Candidate predictors**  
12  
13  
14  
15  
16  
17

18 ***Demographical variables***  
19  
20

21 Participants' demographic variables [age, gender, education] will be collected at baseline  
22 from open hospital records and patient interview.  
23  
24  
25  
26

27 **Age**  
28  
29  
30

31 Age is a significant factor in TMD incidence and prevalence. Lipton et al. found different  
32 age-specific prevalence for face/jaw pain: 6.5% in aged 18-34, 5.0% in 35-54 years old, 4.0% in  
33 55-74 years old and 3.9% in people > 74 year old, showing a prevalence reduction across the  
34 lifetime<sup>1</sup>. By contrast, data from the OPPERA study<sup>2</sup> showed a 40% increased risk for TMD among  
35 individuals aged 25-34 years and a 50% increased risk for TMD among individuals aged 35-50  
36 years.  
37  
38  
39  
40  
41  
42  
43  
44  
45

46 **Gender**  
47  
48  
49

50 Women are 1.5-2 times more likely to develop TMD than men<sup>3-5</sup>. Currently, there is no  
51 study examining the extent of recovery from TMD in men and women. Nevertheless, gender is a  
52 significant factor to be considered.  
53  
54  
55  
56  
57  
58  
59  
60

## Education

The National Centre of Health and Statistic (NCHS)<sup>6</sup> found that the differences in jaw pain prevalence among different educational groups are minimal. On the other hand, there is evidence that people with lower levels of education adopt maladaptive coping strategies, including a tendency to catastrophize about their pain<sup>7</sup>. As a result, the education levels will be collected as candidate predictor of outcome by classifying education into three categories: basic education, intermediate education and university-level education.

## ***General health variable***

### EuroQol Five Dimension Scale, 5-level [EQ-5D-5L]

According to Kapos et al.<sup>8</sup>, health-related quality of life can be a significant factor influencing treatment outcome for TMD. The results showed that a higher health-related quality of life predicted lower TMD pain intensity at an 8 year follow-up. Health-related quality of life will be measured using the Italian version of the EQ-5D-5L [www.euroqol.org]. This instrument transforms different health states into a single value with range 0-1 where 1 is perfect health, and it measures the patient's own judgement about his/her health outcome through a visual analogue scale range 0–100, representing respectively 'worst' to 'best' imaginable health state<sup>9</sup>. The EQ-5D-5L, with 5 possible responses to each item, has increased inter-observer [ICC 2,1 0.57] and test-retest [ICC 2,1 0.69] reliability compared to the previous EQ-5D-3L<sup>10</sup>. Additionally, it has less ceiling effects [20.8% reduction] and adequate convergent validity when compared with the WHO-5 [Spearman rank 0.38-0.51]<sup>11</sup>.

## Sleep quality

1  
2  
3 It is known that chronic pain patients may suffer from poor sleep quality, even if it is  
4 difficult to draw a causal relation<sup>12</sup>. Consequently, sleep quality will be assessed as a candidate  
5 predictor because of its possible role among other factors in the transition from acute to chronic  
6 pain. Sleep quality will be evaluated through an 11-point Numerical Rating Scale [NRS], where 0  
7 is 'the best possible sleep' and 10 is 'the worst possible sleep'. This scale owns moderate  
8 psychometric properties in fibromyalgia patients to assess current sleep quality [over the previous  
9 24 hour period] with a symptom diary<sup>13</sup>. We will use the 0-10 NRS to assess average sleep quality,  
10 related to the preceding 6-months at baseline<sup>14</sup>, although no psychometric properties have  
11 previously been reported for this recall period.  
12  
13  
14  
15  
16  
17  
18  
19  
20  
21  
22  
23

### 24 *Psychosocial features*

25  
26  
27  
28  
29 Psychosocial factors are known to influence TMD onset and chronicity<sup>15</sup>. Psychological  
30 distress is significantly linked to a greater severity and persistence of TMD pain<sup>16</sup>. Moreover,  
31 depression and high levels of stress are significantly more common in people with chronic TMD<sup>17-</sup>  
32  
33  
34  
35  
36  
37  
38  
39  
40  
41  
42  
43  
44  
45  
46  
47  
48  
49  
50  
51  
52  
53  
54  
55  
56  
57  
58  
59  
60  
18. In addition, there is agreement about the predictive strength of psychosocial factors in primary  
care among different musculoskeletal pain conditions<sup>19-20</sup>.

### 41 The Hospital Anxiety and Depression Scales [HADS]

42  
43  
44  
45  
46  
47  
48  
49  
50  
51  
52  
53  
54  
55  
56  
57  
58  
59  
60  
The Italian version of the HAD<sup>21</sup> will be utilised to investigate depression, anxiety and  
manifestations of somatic symptoms<sup>22</sup>. This scale consists of two subscales [anxiety: HADS-A;  
depression: HADS-D] with 7 items and a total score from 0 to 21, with a higher score indicating  
elevated levels of anxiety and depression<sup>23</sup>.

56 HADS has been studied in different groups confirming adequate to excellent internal

1  
2  
3 consistency of HADS-A [0.68-0.93] and HADS-D [0.67-0.90]<sup>23</sup>. In a coronary heart disease  
4 sample, the standard measurement of error was 1.37 for anxiety and 1.44 for depression; the  
5 minimal detectable change was 3.80 for anxiety and 3.99 for depression<sup>24</sup>. The HADS has  
6 excellent concurrent validity in comparison to other depression/anxiety scales<sup>23</sup>.  
7  
8  
9  
10  
11  
12

### 13 Coping Strategies Questionnaire 27 [CSQ-27]

14  
15  
16  
17 Forssell et al.<sup>25</sup> found that a low perceived ability to control pain increases the risk for poor  
18 prognosis of TMD pain at one year regardless of the type of treatment. The Italian version of the  
19 CSQ-27<sup>26</sup> will be used to provide an indication of coping strategies used by participants when they  
20 are in pain. This 27-item questionnaire contains six domains to assess the strategies for coping  
21 with pain: *Distraction*, *Catastrophizing*, *Ignoring pain sensations*, *Distancing from pain*, *Coping*  
22 *self-statements*, and *Praying*. Patients rate the specific strategies for coping with pain using a  
23 seven-point Likert scale [for each domain] ranging from 0 “Never do that” to 6 “Always do that”,  
24 with higher scores indicating greater use<sup>27</sup>. A recent study in a low back pain cohort<sup>28</sup>, in which  
25 individual items from multiple questionnaires were factorised, suggested that diversion,  
26 reinterpreting and cognitive coping clustered together as a single factor, representing coping  
27 cognitions; by contrast, catastrophizing clustered with pain-related distress items. The original  
28 form was examined in English-speaking subjects and revealed acceptable internal consistency  
29 [Cronbach’s alpha estimates ranging from 0.72 to 0.86] and satisfying construct validity<sup>27</sup>.  
30  
31  
32  
33  
34  
35  
36  
37  
38  
39  
40  
41  
42  
43  
44  
45  
46  
47

### 48 Treatment expectation

49  
50  
51  
52 A positive treatment expectation is considered as a treatment moderator because of its  
53 influence on treatment outcome<sup>29</sup>. A positive treatment expectation is predictive of good outcome  
54  
55  
56  
57  
58  
59  
60

1  
2  
3 because the expectation of benefit (placebo) has a robust effect on pain<sup>30</sup>. In the current study we  
4 will investigate treatment expectation following the same protocol used by Puentedura et al<sup>31</sup>.  
5  
6 Participants will be asked whether they “Completely disagree”, “Somewhat disagree”, “Neutral”,  
7  
8 “Somewhat agree”, “Completely agree” with the following statement: “I believe that *manual*  
9  
10 *techniques applied to my jaw* will significantly help to improve my pain”. If the participant chooses  
11  
12 “completely disagree,” “somewhat disagree,” or “neutral,” there is not a positive expectation that  
13  
14 manual therapy applied to craniomandibular structures will significantly help their  
15  
16 temporomandibular disorder. If the participant chooses “somewhat agree” or “completely agree,”  
17  
18 there is a positive expectation that manual therapy applied to craniomandibular structures will  
19  
20 significantly help their temporomandibular disorder.  
21  
22  
23  
24  
25  
26

### 27 ***TMD characteristics***

28  
29  
30  
31 Based on previous studies on predictive factors of outcome in TMD patients<sup>8,25,32</sup>, pain  
32  
33 characteristics [e.g. pain duration, pain intensity, pain location] are good predictors for pain change  
34  
35 in the long-term. In addition, across a variety of different conditions, pain features were reported  
36  
37 to hold predictive value for pain modulation<sup>19,33-35</sup>.  
38  
39  
40

### 41 **Pain Duration**

42  
43  
44  
45 According to Grossman et al.<sup>32</sup>, pain duration could be a significant factor influencing the  
46  
47 treatment outcome for TMD. Their results underline the fact that a longer pain duration is  
48  
49 associated with a more refractory therapeutic approach. Consequently, the pain duration [measured  
50  
51 in “days”] will be collected as candidate predictor of outcome from open hospital records and  
52  
53 patient interview.  
54  
55  
56  
57  
58  
59  
60

### Pain intensity

As shown in a previous study<sup>32</sup>, high levels of pain intensity at baseline in people with TMD, can be associated with no-clinically significant results at a midterm [3-4 months] follow up. Pain intensity will be calculated by averaging ratings of current pain, average pain, and worst pain in the past week using the visual analogue scale (VAS), consisting of a horizontal line measuring 10 cm (without marks), with “no pain” written at the left extremity, and “unbearable pain” written at the right extremity<sup>36</sup>. Patients will be educated to trace a perpendicular line on the horizontal line to intend the pain intensity. The distance from the 0 points will be after measured in millimetres. The VAS is a reliable and valid scale to assess pain intensity<sup>37</sup>.

### Pain location and extent

Forssell et al.<sup>25</sup> found that a high number of pain conditions increases the risk for poor prognosis of TMD pain at one year regardless of the type of treatment. Comorbid painful areas are common in patients with TMD pain<sup>38</sup>. Therefore, the pain location and the pain extent will be collected as a candidate predictor of outcome. This will be recorded as described in the DC/TMD protocol<sup>16,39-44</sup>. Patients will be asked to complete a pain drawing symbolising the spatial distribution of the pain, over one chart with a frontal view of the body, one with a dorsal view and one with a dental setting (more specific for the jaw and teeth pain). Pain reported in different body areas (e.g., headache, back pain, pelvic pain, neck pain) can be summarised as a count variable. The extent of pain will be calculated as % of the body area by using an image scanning software (ImageJ: Image Processing and Analysis in Java, <http://imagej.nih.gov/ij/>; Klong Image Measurement: <http://www.imagemasurement.com/experience-image-measurement/pain-assessment-image-measurement>)

### Central Sensitization Inventory (CSI)<sup>45</sup>

Central sensitization can be present in different pain disorders including low back pain<sup>46</sup>, neck pain<sup>47</sup>, fibromyalgia<sup>48</sup>, and TMD<sup>49</sup>. The Italian version of the Central Sensitization Inventory (CSI)<sup>50</sup> will be used. Part A consists of a 0-100 score for 25 items on current health symptoms with five options ranging from ‘never’ (0) to ‘always’ (4). Part B examines previous physician diagnoses among seven different conditions<sup>45</sup>. The CSI has significant test-retest reliability and internal consistency in subjects with and without pain<sup>45</sup>. The Italian version of the CSI showed a satisfactory Cronbach’s alpha [0.87]<sup>50</sup>.

### Classification of TMD

Manual therapy could potentially be beneficial for both myogenous and arthrogeous TMD<sup>51</sup>. The TMD type will therefore be collected as a candidate predictor of outcome. As stated in the inclusion criteria, every patient included in the study will be diagnosed according to the Axis I of the Diagnostic Criteria for TMD DC/TMD<sup>39</sup>. Based on these criteria, Peck et al.<sup>52</sup> reported different types of TMD. This Taxonomic Classification of TMD includes four main domains: TMJ Disorders, Masticatory Muscle Disorders, Headache and Associated Disorders. An additional domain, called Mixed TMD (simultaneous presence of TMJ Disorders and Masticatory Muscle Disorders) will be included. For every patient the type of TMD (total of 5 domains) will be collected as candidate predictors from the patient medical records.

### Characteristic pain intensity and disability



1  
2  
3 A greater number of disability days increases the risk of having clinically significant pain  
4 one year after an initial assessment<sup>25</sup>. In this study we will use the Italian version of Graded  
5 Chronic Pain Scale [GCPS] version 2.0 [www.rdc-tmdinternational.org]<sup>53</sup> following the DC/TMD  
6  
7  
8  
9  
10 protocol recommendations<sup>39,42,44</sup>. This scale has good internal consistency in temporomandibular  
11  
12  
13 pain [Cronbach's alpha of 0.84]<sup>54</sup>. The GCPS measures the facial pain severity over the preceding  
14  
15 6-months by unifying pain intensity and pain-related disability. The characteristic pain intensity  
16  
17 score [range: 0-100] is the mean of three pain intensity measurements: 'at the present time' and  
18  
19 'worst pain' and the 'average' pain over the preceding 6 months. The disability status is measured  
20  
21 with a 0-6 point score derived from a combination of the number of disability days and the  
22  
23 disability level [range: 0-100; limitation given by pain in performing activities of daily living].  
24  
25 Based on these scores, the participant's chronic pain and disability status can be classified into one  
26  
27 of the five ordinal categories of chronic pain severity<sup>55</sup>.  
28  
29  
30

### 31 Oral Behaviour

32  
33  
34  
35 People with abnormal oral behaviours with scores above 25 in the Oral Behaviours  
36  
37 Checklist [OBC] are 75% more likely to develop TMD than individuals with a score below  
38  
39 17<sup>42,44,56</sup>. Parafunctional habits could play a significant role in the development and the persistence  
40  
41 of TMD pain<sup>58</sup>. In this study we will use the Italian version of the RDC/TMD questionnaire Axis  
42  
43 II Oral Behaviours Checklist [www.rdc-tmdinternational.org]<sup>42,56</sup> following the DC/TMD protocol  
44  
45 recommendations<sup>39,56</sup>. The OBC measures the self-reported frequency over the preceding month  
46  
47 of each of 21 activities involving the jaw such as clenching the teeth or bracing the jaw (five ordinal  
48  
49 response options, ranging from "none of the time," coded 0, to "all of the time," coded 4).  
50  
51 Psychometric properties of this instrument suggest that it is valid, with patient behaviours  
52  
53 matching those measured<sup>56,57,59</sup>. Scoring is computed as the sum of the number of items with non-  
54  
55  
56  
57  
58  
59

1  
2  
3 zero response or as a weighted sum [e.g. the sum of the endorsed frequencies of the respective  
4 items]<sup>56</sup>.  
5  
6  
7

## 8 9 10 **Clinical tests of the TMJ and masticatory muscles**

### 11 TMJ range of motion

12  
13  
14  
15 Mobility testing of the TMJ denotes an essential sign of TMD, it is one of the most reliable  
16 clinical measures<sup>39</sup>. Grossman et al.<sup>8</sup> examined the preoperative variables of TMD patients with  
17 articular disc displacement without reduction that may alter the effects of arthrocentesis on joint  
18 effusion. They observed that small maximum interincisal distance influences treatment outcome.  
19  
20 As a result, we will use the Maximal Mouth Opening (MMO) without pain as measure of TMJ  
21 range of motion. The measurements will be in millimeters and will be taken with a ruler in a  
22 neutral craniocervical position [e.g. sitting or supine]. The distance between the incisal edges of  
23 the maxillary and mandibular reference teeth, as described in the DC/TMD protocol<sup>44</sup>, will be  
24 measured. Participants will be asked to open the mouth as wide as they can without feeling any  
25 pain, or without increasing any present pain. The tip of the ruler will be located against the incisal  
26 edge of the mandibular reference incisor, and the distance to the mesial-distal center of the edge  
27 of the maxillary central incisor will be read. The test will be repeated twice if the pain-free opening  
28 if less than 30mm<sup>44</sup>. Assessment of mandibular ROM in a neutral craniocervical position obtained  
29 good inter- and intra-rater reliability for MMO<sup>60</sup>.  
30  
31  
32  
33  
34  
35  
36  
37  
38  
39  
40  
41  
42  
43  
44  
45  
46  
47

### 48 TMJ palpation pain:

49  
50  
51 Pain induced in joints via palpation is a useful clinical test that allows to understand if the  
52 provoked pain duplicates or replicates the patient's pain complaint by identifying potential joint  
53  
54  
55  
56  
57  
58  
59  
60

1  
2  
3 origin<sup>44</sup>. For this palpation, finger pressure is calibrated [1.0 kg], as described in the DC/TMD  
4 protocol<sup>44</sup>, using a simple hand-held algometer prior to palpation examination. While the  
5 participant mandible is in a comfortable position or in a slightly protruded position, the examiner's  
6 index finger will be placed just anterior to the tragus of the ear and dorsal to the TMJ with the  
7 participant in neutral craniocervical position e.g. sitting or supine. The index finger will press while  
8 orbiting around the lateral pole in a circular fashion over the superior aspect of the condyle and  
9 then anteriorly [from the 9:00 to the 3:00 position, and then continuing fully around the condyle].  
10 Palpation will last 5 seconds for each pressed point<sup>44</sup>. If a participant complains of familiar pain in  
11 at least one pressed point the point score of this test will be 1; if there is no pain at any points the  
12 point score of this test will be 0 [range 0-1: no pain =0; pain = 1]. Palpation will be performed in  
13 the left and right side. The interexaminer reliability values of TMJ palpation in TMD patients is  
14 0.59 and the specificity values is acceptable [above 0.90]<sup>61</sup>.

### 31 Muscle palpation pain

32  
33  
34 For this assessment, finger pressure is calibrated to 1.0 kg for masseter muscles and 0.5 kg  
35 for lateral pterygoid area and temporalis tendons as described in the DC/TMD protocol<sup>44</sup>, using a  
36 simple hand-held algometer prior to palpation examination. Pain induced in muscles via palpation  
37 is a useful clinical test that allows to understand whether the provoked pain duplicates or replicates  
38 the patient's pain complaint by identifying potential muscular origin<sup>44</sup>. Palpation will be performed  
39 with the participant in a neutral craniocervical position (e.g. sitting or supine), on the left and right  
40 side and will last 5 seconds for each testing point<sup>44</sup>. The inter-examiner reliability values of  
41 palpation in TMD patients is 0.59 and the specificity values are acceptable [above 0.90]<sup>61</sup>. The  
42 feasibility of the lateral pterygoid muscle palpation is controversial. Some authors defined it as a  
43 feasible palpation technique<sup>62</sup>, and others considered this muscle inaccessible<sup>63</sup>. Therefore, in this  
44  
45  
46  
47  
48  
49  
50  
51  
52  
53  
54  
55  
56  
57  
58  
59  
60

1  
2  
3 study, this parameter [pain at lateral pterygoid site] will not be considered alone but in combination  
4  
5 with pain at other muscular sites.  
6  
7  
8  
9

10  
11 *Lateral pterygoid area:* palpation will be performed with a finger pressure calibrated at 0.5  
12 kg (DC/TMD protocol<sup>44</sup>). The palpation will take place as described in FIG.1. If a participant  
13 complains of familiar pain during palpation the lateral pterygoid area will be considered as a  
14  
15 painful site.  
16  
17  
18  
19  
20  
21  
22  
23  
24  
25

26  
27 **FIG. 1 Lateral pterygoid area:** Finger is placed as  
28 shown. Palpate the vestibule in posterior-superior-  
29  
30 medial direction while the mandible is omolaterally  
31  
32 deviated.  
33  
34  
35  
36  
37  
38

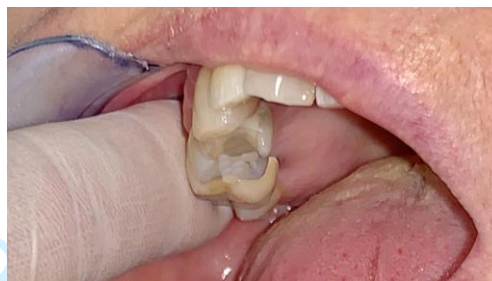

39  
40  
41 *Masseter muscle:* masseter palpation consists of a sequence of three palpation sites with  
42 finger pressure calibrated to 1.0 kg (DC/TMD protocol<sup>44</sup>): origin zone [inferior to the bony margin  
43 of the zygomatic process], body zone [in front of ear lobe] and insertion zone [superior to the  
44 mandibular angle]. In each zone, the palpation continues until the anterior boundary of the muscle  
45 is reached<sup>44</sup>. If a participant complains of familiar pain in at least one pressed point, the masseter  
46  
47 muscle will be considered as a painful site.  
48  
49  
50  
51  
52

53  
54 *Temporalis tendon area:* the palpation will be performed with a finger pressure calibrated  
55 to 0.5 kg (DC/TMD protocol<sup>44</sup>). The palpation will take place as described in FIG.2. If a participant  
56  
57  
58  
59  
60

1  
2  
3 complains of familiar pain during the palpation the temporalis tendon area will be considered as a  
4  
5 painful site.  
6  
7  
8  
9

10  
11 **FIG. 2 Temporalis tendon area:** Finger is located against the ascending mandibular ramus  
12 while the mouth is slightly open. The palpation direction is  
13 superior as far as possible by following the bone surface.  
14  
15  
16  
17



18  
19  
20  
21  
22 *Total score:* if a participant complains of familiar pain  
23 in at least three of the six examined sites the score will be 1,  
24 otherwise it will be 0 [score range 0–1: < 3 sites with familiar pain = 0; ≥ 3 sites with familiar pain  
25 = 1]<sup>64</sup>.  
26  
27  
28  
29  
30  
31  
32  
33  
34  
35

### 36 JAw-test

37  
38  
39 The JAw-test is a clinical test that aims to investigate the immediate effects of four brief  
40 intraoral manual therapy techniques on pain and on TMJ range of motion. The participant will be  
41 positioned in supine position. Before starting the test, the TMJ range of motion without pain will  
42 be measured [MMO - millimeters] with a ruler, as described above, according to DC/TMD  
43 protocol<sup>44</sup>. Then the participant will be asked to rate his/her pain through the Verbal Rating Scale  
44 (VRS) “at rest”, “during clenching” and “during the maximal opening of the mouth”; an average  
45 of the three pain scores will be registered. For this test, finger pressure is calibrated [1.0 kg], in the  
46 same way described in the DC/TMD protocol<sup>44</sup>, using a simple hand-held algometer prior to  
47  
48  
49  
50  
51  
52  
53  
54  
55  
56  
57  
58  
59  
60

1  
2  
3 palpation examination.  
4

5 Participants will be informed with the following words: “*I am going to perform four manual*  
6 *techniques on some muscles and joints in your jaw region. You may feel a little pain, if the pain*  
7 *increases and becomes too intense, let me know, I will reduce the pressure until the pain returns*  
8 *to acceptable levels*”.  
9  
10  
11  
12  
13

14 *First technique: Lateral pterygoid area*

15  
16  
17 This techniques will be performed on the most painful side. While one hand stabilizes the  
18 participant’s head on the least painful side, the other hand will be used to apply pressure over the  
19 lateral pterygoid area as described above and in accordance with the DC/TMD protocol<sup>44</sup>. In this  
20 position, compression [1.0 kg] is applied for 30-60 seconds.  
21  
22  
23  
24  
25

26 *Second technique: Temporalis tendon area*

27  
28 This techniques will be performed on the most painful side. While one hand stabilizes the  
29 participant’s head on the least painful side, the other hand (index finger) will be used to apply  
30 pressure over the Temporalis tendon area as described above and in accordance with the DC/TMD  
31 protocol<sup>44</sup>. In this position, compression [1.0 kg] is applied for 30-60 seconds.  
32  
33  
34  
35  
36  
37

38 *Third technique: Mylohyoid area*

39  
40 The participant will be instructed to open the mouth to let the examiner’s finger reach the  
41 mylohyoid area in a central position on the mylohyoid raphe. The other hand of the examiner will  
42 reach the same area using a finger through an extraoral approach. In this position a combined  
43 compression (1.0 kg) will be applied for 30-60 seconds.  
44  
45  
46  
47  
48

49 *Fourth technique: TMJ mobilization*

50  
51 An intraoral ventral and caudal anterior glide [mobilisation grades I and II] of both the  
52 TMJs will be performed for 30 seconds as described by Cleland et al.<sup>65</sup>  
53  
54  
55  
56  
57  
58  
59  
60

1  
2  
3 *Final scores:*  
4

5 After the tests, the TMJ range of motion without pain will be measured [MMO -  
6 millimeters] with a ruler, as described above, according to DC/TMD protocol<sup>44</sup>. Then the  
7 participant will be asked to rate his/her pain using the Verbal Rating Scale (VRS) “at rest”, “during  
8 clenching” and “during the maximal opening of the mouth”; an average of these three pain scores  
9 will be registered. If a participant shows only an improvement in pain [average score VRS pre-test  
10 > average score VRS post-test] the score will be 1; if a participant shows only an improvement of  
11 TMJ mobility [MMO pre-test < MMO post-test at least 2 millimeters] the score will be 1; if a  
12 participant shows improvements in both pain and TMJ mobility, the score will be 2; if a participant  
13 shows no improvements the score will be 0 [Score range 0-2: 0 = no change; 1 = VRS improvement  
14 or MMO improvement; 2 = improvement of both].  
15  
16  
17  
18  
19  
20  
21  
22  
23  
24  
25  
26  
27  
28  
29  
30  
31  
32  
33  
34  
35  
36  
37  
38  
39  
40  
41  
42  
43  
44  
45  
46  
47  
48  
49  
50  
51  
52  
53  
54  
55  
56  
57  
58  
59  
60

## REFERENCES

1. Lipton JA, Ship JA, Larach-Robinson D. Estimated prevalence and distribution of reported orofacial pain in United States. *J Am Dent Assoc.* 1993;124:115-112.
2. Fillingim RB, Ohrbach R, Greenspan JD, Knott C, Dubner R, Bair E, Baraian C, Slade GD, Maixner W. Potential psychosocial risk factors for chronic TMD: descriptive data and empirically identified domains from the OPPERA case-control study. *J Pain.* 2011; 12(11 Suppl):T46-60.
3. Helkimo M. Studies on function and dysfunction of the masticatory system. IV. Age and sex distribution of symptoms of dysfunction of the masticatory system in Lapps in the north of Finland. *Acta Odontol Scand.* 194; 32(4):255-67.
4. Von Korff M, Dworkin SF, Le Resche L, Kruger A. An epidemiologic comparison of pain complaints'. *Pain.* 1988; 32(2):173-83.
5. Plesh O, Adams SH, Gansky SA. Temporomandibular joint and muscle disorders-type pain and comorbid pains in a national US sample. *J Orofacial Pain.* 2011;25: 190-198.
6. NCHS. Summary Health Statistics Tables for the U.S. Population: National Health Interview Survey, 2014 (12/2015) [Online]. CDC/National Centre of Health and Statistics. Available: <http://www.cdc.gov/nchs/nhis/SHS/tables.htm> [March 10, 2019]
7. Roth RS, Geisser ME. Educational achievement and chronic pain disability: mediating role of pain-related cognitions. *Clin J Pain.* 2002; 18(5):286-96.
8. Kapos FP, Look JO, Zhang L, Hodges JS, Schiffman EL. Predictors of Long-Term Temporomandibular Disorder Pain Intensity: An 8-Year Cohort Study. *Journal of Oral & Facial Pain and Headache.* 2018; 32(2):113–122.
9. Brooks R. EuroQol: the current state of play. *Health Policy.* 1996; 37(1):53-72.
10. Janssen MF, Birnie E, Haagsma JA. Comparing the standard EQ-5D three-level system with a five-level version. *Value Health.* 2008; 11(2):275-84.
11. Janssen MF, Pickard AS, Golicki D. Measurement properties of the EQ-5D-5L compared to the EQ-5D-3L across eight patient groups: a multi-country study. *Qual Life Res.* 2013; 22(7):1717-27.
12. Sayar K, Arikan M, Yontem T. Sleep quality in chronic pain patients. *Can J Psychiatry.* 2002; 47(9):844-8.
13. Cappelleri JC, McDermott AM, Sadosky AB, Petrie C.D, Martin S. Psychometric properties of a single-item scale to assess sleep quality among individuals with fibromyalgia. *Health Qual Life Outcomes.* 2009; 17(7):54.



14. Rushton AB, Evans DW, Middlebrook N, Heneghan NR, Small C, Lord J, Patel JM, Falla D. Development of a screening tool to predict the risk of chronic pain and disability following musculoskeletal trauma: protocol for a prospective observational study in the United Kingdom. *BMJ Open*. 2018; 28;8(4):e017876.
15. Kight M, Gatchel RJ, Wesley L. Temporomandibular disorders: evidence for significant overlap with psychopathology. *Health Psychol*. 1999; 18(2):177-82.
16. Dworkin SF, Von Korff MR, LeResche L. Multiple pains and psychiatric disturbance: An epidemiologic investigation. *Archives of General Psychiatry*. 1990; 47:239-44.
17. Keefe FJ, Rumble ME, Scipio CD, Giordano LA, Perri LM. Psychological aspects of persistent pain: current state of the science'. *J Pain*. 2004; 5(4):195-211.
18. Gatchel RJ, Peng YB, Peters ML, Fuchs PN, Turk DC. The biopsychosocial approach to chronic pain: scientific advances and future directions. *Psychol Bull*. 2007; 133(4):581-624.
19. Mallen CD, Peat G, Thomas E. Prognostic factors for musculoskeletal pain in primary care: a systematic review. *Br J Gen Pract*. 2007; 57(541):655-61.
20. Artus M, Campbell P, Mallen CD. Generic prognostic factors for musculoskeletal pain in primary care: a systematic review. *BMJ Open*. 2017; 7(1):e012901.
21. Iani L, Lauriola M, Costantini M. A confirmatory bifactor analysis of the Hospital Anxiety and Depression Scale in an Italian community sample. *Health and quality of life outcomes*. 2014; 12:84.
22. Zigmond AS, Snaith RP. The hospital anxiety and depression scale. *Acta Psychiatr Scand*. 1983; 67(6):361-70.
23. Bjelland I, Dahl AA, Haug TT. The validity of the Hospital Anxiety and Depression Scale. An updated literature review. *J Psychosom Res*. 2002; 52(2):69-77.
24. Wang W, Chair SY, Thompson DR, Twinn SF. A Psychometric Evaluation of the Chinese Version of the Hospital Anxiety and Depression Scale in Patients with Coronary Heart Disease. *Journal of Clinical Nursing*. 2009; 18:1908-15.
25. Forssell H, Kauko T, Kotiranta U, Suvinen T. Predictors for future clinically significant pain in patients with temporomandibular disorder: A prospective cohort study. *European Journal of Pain*. 2017; 21(1):188-197.
26. Monticone M, Ferrante S, Giorgi I, Galandra C, Rocca B, Foti C. The 27-item coping strategies questionnaire-revised: confirmatory factor analysis, reliability and validity in Italian-speaking subjects with chronic pain. *Pain Res Manag*. 2014; 19(3):153-8.

- 1  
2  
3 27. Robinson ME, Riley JL, Myers CD, Sadler IJ, Kvaal SA, Geisser ME, Keefe FJ. The Coping  
4 Strategies Questionnaire: a large sample, item level factor analysis. *Clin J Pain*. 1997; 13(1):43-9.  
5  
6  
7 28. Campbell P, Foster NF, Thomas E, Dunn KM. Prognostic Indicators of Low Back Pain in Primary  
8 Care: Five-Year Prospective Study. *J Pain*. 2013; 14(8):873–83.  
9  
10 29. Nicholas MK, Linton SJ, Watson PJ, Main CJ. Early identification and management of  
11 psychological risk factors (“yellow flags”) in patients with low back pain: a reappraisal. *Phys Ther*.  
12 2011; 91:737-753.  
13  
14 30. Vase L, Petersen GL, Riley JL, Price DD. Factors contributing to large analgesic effects in placebo  
15 mechanism studies conducted between 2002 and 2007’. *Pain*. 2009; 145:36-44.  
16  
17  
18 31. Puentedura EJ, Cleland JA, Landers MR, Mintken PE, Louw A, Fernández-de-Las-Peñas C.  
19 Development of a clinical prediction rule to identify patients with neck pain likely to benefit from  
20 thrust joint manipulation to the cervical spine. *J Orthop Sports Phys Ther*. 2012; 42(7):577-92.  
21  
22  
23 32. Grossman E, Poluha RL, Iwaki LCV, Santana RG, Filho LI. Predictors of arthrocentesis outcome  
24 on joint effusion in patients with disk displacement without reduction. *Oral Surgery, Oral  
25 Medicine, Oral Pathology and Oral Radiology*. 2018; 125(4), 382–388.  
26  
27  
28 33. Clay FJ, Watson WL, Newstead SV. A systematic review of early prognostic factors for persisting  
29 pain following acute orthopedic trauma. *Pain Res Manag*. 2012; 17(1):35-44.  
30  
31 34. Clay FJ, Newstead SV, Watson WL. Bio-psychosocial determinants of persistent pain 6 months  
32 after non-life-threatening acute orthopaedic trauma. *J Pain*. 2010; 11(5):420-30.  
33  
34 35. Kamaleri Y, Natvig B, Ihlebaek CM. Change in the number of musculoskeletal pain sites: A 14-  
35 year prospective study. *Pain*. 2009; 141(1-2):25-30.  
36  
37  
38 36. Wewers ME, Lowe NK. A critical review of visual analogue scales in the measurement of clinical  
39 phenomena. *Res Nurs Health*. 1990; 13:227–236.  
40  
41  
42 37. Dworkin RH, Turk DC, Farrar JT, Haythornthwaite JA, Jensen MP, Katz NP, Witter J. Core  
43 outcome measures for chronic pain clinical trials : IMMPACT recommendations. *Pain*. 2005;  
44 113:9–19.  
45  
46 38. Velly A, Schweinhardt P, Friction J. *Comorbid conditions: How they affect orofacial pain. In  
47 Treatment of TMDs: Bridging the Gap Between Advances in Research and Clinical Patient  
48 Management*. Greene, CS, Laskin DM, eds. (Chicago: Quintessence) pp. 91–98; 2013.  
49  
50 39. Schiffman E, Ohrbach R, Truelove E, Look J, Anderson G, Goulet JP, List T, Svensson P,  
51 Gonzalez Y, Lobbezoo F, Michelotti A, Brooks SL, Ceusters W, Drangsholt M, Ettlin D, Gaul C,  
52 Goldberg LJ, Haythornthwaite JA, Hollender L, Jensen R, John MT, De Laat A, de Leeuw R,  
53 Maixner W, van der Meulen M, Murray GM, Nixdorf DR, Palla S, Petersson A, Pionchon P, Smith  
54 B, Visscher CM, Zakrzewska J, Dworkin SF; International RDC/TMD Consortium Network,  
55  
56  
57  
58  
59

- International association for Dental Research; Orofacial Pain Special Interest Group, International Association for the Study of Pain. Diagnostic Criteria for Temporomandibular Disorders (DC/TMD) for Clinical and Research Applications: recommendations of the International RDC/TMD Consortium Network and Orofacial Pain Special Interest Group. *J Oral Facial Pain Headache*. 2014; 28(1):6-27.
40. Macfarlane GJ. Widespread pain: is an improved classification possible?. *Journal of Rheumatology*. 1996, 23(9):1628-1632.
41. Margolis RB, et al. Test-retest reliability of the pain drawing instrument. *Pain*. 1988; 33: 49-51.
42. Ohrbach R, Fillingim RB, Mulkey F, et al. Clinical findings and pain symptoms as potential risk factors for chronic TMD: Descriptive data and empirically identified domains from the OPPERA case-control study. *Journal of Pain*. 2011; 12 (11, Supplement 3):T27-T45.
43. Sanders AE, Slade GD, Bair E, Fillingim RB, Knott C, Dubner R, Greenspan JD, Maixner W, Ohrbach R. General health status and incidence of first-onset temporomandibular disorder: the OPPERA prospective cohort study. *J Pain*. 2013 Dec;14(12 Suppl):T51-62.
44. Ohrbach R, et al. Clinical orofacial characteristics associated with risk of first-onset TMD: the OPPERA prospective cohort study. *Journal of Pain*. 2013, 14(Supplement 2)(12):T33-T50.
45. Mayer TG, Neblett R, Cohen H, Howard KJ, Choi YH, Williams MJ, Gatchel RJ. The Development and Psychometric Validation of the Central Sensitization Inventory. *Pain Practise*. 2012; 12(4):276–285.
46. Roussel NA, Nijs J, Meeus M, Mylius V, Fayt C, Oostendorp R. Central sensitization and altered central pain processing in chronic low back pain: fact or myth?. *The Clinical journal of pain*. 2013; 29:625-38.
47. Van Oosterwijck J, Nijs J, Meeus M, Paul L. Evidence for central sensitization in chronic whiplash: a systematic literature review. *European Journal of Pain*. 2013; 17:299-312.
48. Desmeules J, Chabert J, Rebsamen M, Rapiti E, Piguet V, Besson M. Central pain sensitization, COMT Val158Met polymorphism, and emotional factors in fibromyalgia. *The Journal of Pain*. 2014; 15:129-35.
49. Fernández-de-Las-Peñas C, Galán-del-Río F, Fernández-Carnero J, Pesquera J, Arendt Nielsen L, Svensson P. Bilateral widespread mechanical pain sensitivity in women with myofascial temporomandibular disorder: evidence of impairment in central nociceptive processing. *The Journal of Pain*. 2009; 10:1170-8.
50. Chiarotto A, Viti C, Sulli A, Cutolo M, Testa M, Piscitelli D. Cross-cultural adaptation and validity of the Italian version of the Central Sensitization Inventory. *Musculoskelet Sci Pract*. 2018; 37:20-28.

- 1  
2  
3 51. Armijo-Olivo S, Pitance L, Singh V, Neto F, Thie N, Michelotti A. Effectiveness of Manual  
4 Therapy and Therapeutic Exercise for Temporomandibular Disorders: Systematic Review and  
5 Meta-Analysis. *Physical Therapy*. 2016; 96(1): 9–25.  
6  
7  
8 52. Peck CC, Goulet JP, Lobbezoo F, Schiffman EL, Alstergren P, Anderson GC, de Leeuw R, Jensen  
9 R, Michelotti A, Ohrbach R, Petersson A, List T. Expanding the taxonomy of the diagnostic criteria  
10 for temporomandibular disorders. *J Oral Rehabil*. 201; 41(1):2-23.  
11  
12 53. Von Korff, M. *Assessment of chronic pain in epidemiological and health services research:*  
13 *Empirical bases and new directions. Handbook of Pain Assessment*. D. C. Turk and R. Melzack.  
14 New York, Guilford Press: 455- 473. 2011.  
15  
16  
17 54. Von Korff, M., et al. Grading the severity of chronic pain. *Pain*. 1992; 50:133-149.  
18  
19 55. Von Korff M, et al. *Research diagnostic criteria. Axis II: Pain-related disability and psychological*  
20 *status*. In: S.F. Dworkin & L. LeResche (Eds.), *Research Diagnostic Criteria for*  
21 *Temporomandibular Disorders*. Journal of Craniomandibular Disorders, Facial and Oral Pain 6:  
22 330-334. 1992  
23  
24  
25 56. Ohrbach, R., et al. Waking-state oral parafunctional behaviors: specificity and validity as assessed  
26 by electromyography. *European Journal of Oral Sciences*. 2008; 116: 438-444.  
27  
28 57. Ohrbach R, List T, Goulet JP, Svensson P. Recommendations from the International Consensus  
29 Workshop: Convergence on an Orofacial Pain Taxonomy. *Journal of Oral Rehabilitation*.  
30 2010;37:807-12.  
31  
32  
33 58. Glaros AG, Marszalek JM, Williams KB. Longitudinal Multilevel Modeling of Facial Pain,  
34 Muscle Tension, and Stress. *Journal of dental research*. 2016; 95(4), 416-22.  
35  
36  
37 59. Markiewicz MR, Ohrbach R, McCall WD Jr. Oral behaviors checklist: Reliability of performance  
38 in targeted waking-state behaviors. *J Orofacial Pain*. 2006; 20:306-316.  
39  
40 60. Beltran-Alacre H, López-de-Uralde-Villanueva I, Paris-Aleman A, Angulo-Díaz-Parreño S, La  
41 Touche R. Intra-rater and Inter-rater Reliability of Mandibular Range of Motion Measures  
42 Considering a Neutral Craniocervical Position. *Journal of physical therapy science*. 2014; 26(6),  
43 915-20.  
44  
45  
46 61. Gomes MB, Guimarães JP, Guimarães FC, Neves AC. Palpation and pressure pain threshold:  
47 reliability and validity in patients with temporomandibular disorders. *Cranio*. 2008; 26(3):202-10  
48  
49 62. Stelzenmueller W, Umstadt H, Weber D, Goenner-Oezkan V, Kopp S, Lisson J. Evidence - The  
50 intraoral palpability of the lateral pterygoid muscle - A prospective study. *Ann Anat*. 2016; 206:89-  
51 95.  
52  
53  
54 63. Türp JC, Minagi S. Palpation of the lateral pterygoid region in TMD--where is the evidence?. *J*  
55 *Dent*. 2001; 29(7):475-83.  
56  
57  
58  
59

- 1  
2  
3  
4 64. Friction J. *Physical evaluation: the need for a standardized examination*. In: Friction JR, ed.  
5 Temporomandibular joint and craniofacial pain: diagnosis and management. St Louis: Ishiyaku  
6 Euroamerica; 1988:46–47.  
7  
8  
9 65. Cleland J, Palmer J. Effectiveness of Manual Physical Therapy, Therapeutic Exercise, and Patient  
10 Education on Bilateral Disc Displacement Without Reduction of the Temporomandibular Joint: A  
11 Single-Case Design. *Journal of Orthopaedic & Sports Physical Therapy*. 2004; 34(9):535–548.  
12  
13  
14  
15  
16  
17  
18  
19  
20  
21  
22  
23  
24  
25  
26  
27  
28  
29  
30  
31  
32  
33  
34  
35  
36  
37  
38  
39  
40  
41  
42  
43  
44  
45  
46  
47  
48  
49  
50  
51  
52  
53  
54  
55  
56  
57  
58  
59  
60

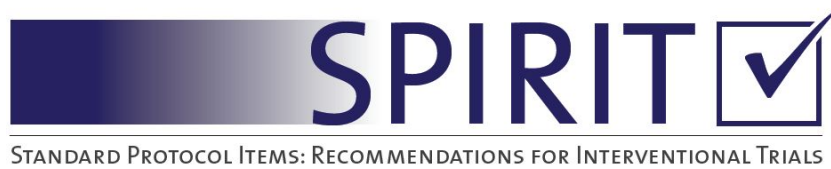

SPIRIT 2013 Checklist: Recommended items to address in a clinical trial protocol and related documents\*

| Section/item                      | Item No | Description                                                                                                                                                                                                                                                                                    |
|-----------------------------------|---------|------------------------------------------------------------------------------------------------------------------------------------------------------------------------------------------------------------------------------------------------------------------------------------------------|
| <b>Administrative information</b> |         |                                                                                                                                                                                                                                                                                                |
| Title                             | 1       | Descriptive title identifying the study design, population, interventions, and, if applicable, trial acronym – Page 1                                                                                                                                                                          |
| Trial registration                | 2a      | Trial identifier and registry name. If not yet registered, name of intended registry – N/A                                                                                                                                                                                                     |
|                                   | 2b      | All items from the World Health Organization Trial Registration Data Set – N/A                                                                                                                                                                                                                 |
| Protocol version                  | 3       | Date and version identifier – Page 1                                                                                                                                                                                                                                                           |
| Funding                           | 4       | Sources and types of financial, material, and other support – Page 22                                                                                                                                                                                                                          |
| Roles and responsibilities        | 5a      | Names, affiliations, and roles of protocol contributors – Pages 1 and 22                                                                                                                                                                                                                       |
|                                   | 5b      | Name and contact information for the trial sponsor – N/A                                                                                                                                                                                                                                       |
|                                   | 5c      | Role of study sponsor and funders, if any, in study design; collection, management, analysis, and interpretation of data; writing of the report; and the decision to submit the report for publication, including whether they will have ultimate authority over any of these activities – N/A |
|                                   | 5d      | Composition, roles, and responsibilities of the coordinating centre, steering committee, endpoint adjudication committee, data management team, and other individuals or groups overseeing the trial, if applicable (see Item 21a for data monitoring committee) – N/A                         |
| <b>Introduction</b>               |         |                                                                                                                                                                                                                                                                                                |
| Background and rationale          | 6a      | Description of research question and justification for undertaking the trial, including summary of relevant studies (published and unpublished) examining benefits and harms for each intervention – Pages 4-6                                                                                 |
|                                   | 6b      | Explanation for choice of comparators – Supplementary file                                                                                                                                                                                                                                     |
| Objectives                        | 7       | Specific objectives or hypotheses - Page 5-6                                                                                                                                                                                                                                                   |

1  
2  
3  
4  
5  
6  
7  
8  
9  
10  
11  
12  
13  
14  
15  
16  
17  
18  
19  
20  
21  
22  
23  
24  
25  
26  
27  
28  
29  
30  
31  
32  
33  
34  
35  
36  
37  
38  
39  
40  
41  
42  
43  
44  
45  
46  
47  
48  
49  
50  
51  
52  
53  
54  
55  
56  
57  
58  
59  
60

|              |   |                                                                                                                                                                                                                 |
|--------------|---|-----------------------------------------------------------------------------------------------------------------------------------------------------------------------------------------------------------------|
| Trial design | 8 | Description of trial design including type of trial (eg, parallel group, crossover, factorial, single group), allocation ratio, and framework (eg, superiority, equivalence, noninferiority, exploratory) – N/A |
|--------------|---|-----------------------------------------------------------------------------------------------------------------------------------------------------------------------------------------------------------------|

### **Methods: Participants, interventions, and outcomes**

|               |   |                                                                                                                                                                                             |
|---------------|---|---------------------------------------------------------------------------------------------------------------------------------------------------------------------------------------------|
| Study setting | 9 | Description of study settings (eg, community clinic, academic hospital) and list of countries where data will be collected. Reference to where list of study sites can be obtained – Page 6 |
|---------------|---|---------------------------------------------------------------------------------------------------------------------------------------------------------------------------------------------|

|                      |    |                                                                                                                                                                                                        |
|----------------------|----|--------------------------------------------------------------------------------------------------------------------------------------------------------------------------------------------------------|
| Eligibility criteria | 10 | Inclusion and exclusion criteria for participants. If applicable, eligibility criteria for study centres and individuals who will perform the interventions (eg, surgeons, psychotherapists) – Pages 7 |
|----------------------|----|--------------------------------------------------------------------------------------------------------------------------------------------------------------------------------------------------------|

|               |     |                                                                                                                                        |
|---------------|-----|----------------------------------------------------------------------------------------------------------------------------------------|
| Interventions | 11a | Interventions for each group with sufficient detail to allow replication, including how and when they will be administered – Pages 8-9 |
|---------------|-----|----------------------------------------------------------------------------------------------------------------------------------------|

|  |     |                                                                                                                                                                                                         |
|--|-----|---------------------------------------------------------------------------------------------------------------------------------------------------------------------------------------------------------|
|  | 11b | Criteria for discontinuing or modifying allocated interventions for a given trial participant (eg, drug dose change in response to harms, participant request, or improving/worsening disease) – Page 9 |
|--|-----|---------------------------------------------------------------------------------------------------------------------------------------------------------------------------------------------------------|

|  |     |                                                                                                                                                         |
|--|-----|---------------------------------------------------------------------------------------------------------------------------------------------------------|
|  | 11c | Strategies to improve adherence to intervention protocols, and any procedures for monitoring adherence (eg, drug tablet return, laboratory tests) – N/A |
|--|-----|---------------------------------------------------------------------------------------------------------------------------------------------------------|

|  |     |                                                                                                               |
|--|-----|---------------------------------------------------------------------------------------------------------------|
|  | 11d | Relevant concomitant care and interventions that are permitted or prohibited during the trial – Pages 7 and 9 |
|--|-----|---------------------------------------------------------------------------------------------------------------|

|          |    |                                                                                                                                                                                                                                                                                                                                                                                                                                                             |
|----------|----|-------------------------------------------------------------------------------------------------------------------------------------------------------------------------------------------------------------------------------------------------------------------------------------------------------------------------------------------------------------------------------------------------------------------------------------------------------------|
| Outcomes | 12 | Primary, secondary, and other outcomes, including the specific measurement variable (eg, systolic blood pressure), analysis metric (eg, change from baseline, final value, time to event), method of aggregation (eg, median, proportion), and time point for each outcome. Explanation of the clinical relevance of chosen efficacy and harm outcomes is strongly recommended – Page 9 and 10 (primary outcome), Supplementary file (candidate predictors) |
|----------|----|-------------------------------------------------------------------------------------------------------------------------------------------------------------------------------------------------------------------------------------------------------------------------------------------------------------------------------------------------------------------------------------------------------------------------------------------------------------|

|                      |    |                                                                                                                                                                                              |
|----------------------|----|----------------------------------------------------------------------------------------------------------------------------------------------------------------------------------------------|
| Participant timeline | 13 | Time schedule of enrolment, interventions (including any run-ins and washouts), assessments, and visits for participants. A schematic diagram is highly recommended (see Figure) – Pages 7-8 |
|----------------------|----|----------------------------------------------------------------------------------------------------------------------------------------------------------------------------------------------|

|             |    |                                                                                                                                                                                                 |
|-------------|----|-------------------------------------------------------------------------------------------------------------------------------------------------------------------------------------------------|
| Sample size | 14 | Estimated number of participants needed to achieve study objectives and how it was determined, including clinical and statistical assumptions supporting any sample size calculations – Page 12 |
|-------------|----|-------------------------------------------------------------------------------------------------------------------------------------------------------------------------------------------------|

|             |    |                                                                                               |
|-------------|----|-----------------------------------------------------------------------------------------------|
| Recruitment | 15 | Strategies for achieving adequate participant enrolment to reach target sample size – Pages 7 |
|-------------|----|-----------------------------------------------------------------------------------------------|

### **Methods: Assignment of interventions (for controlled trials)**

Allocation:



|    |                |     |                                                                         |
|----|----------------|-----|-------------------------------------------------------------------------|
| 1  |                |     |                                                                         |
| 2  | Sequence       | 16a | Method of generating the allocation sequence (eg, computer-             |
| 3  | generation     |     | generated random numbers), and list of any factors for stratification.  |
| 4  |                |     | To reduce predictability of a random sequence, details of any planned   |
| 5  |                |     | restriction (eg, blocking) should be provided in a separate document    |
| 6  |                |     | that is unavailable to those who enrol participants or assign           |
| 7  |                |     | interventions – N/A                                                     |
| 8  |                |     |                                                                         |
| 9  |                |     |                                                                         |
| 10 | Allocation     | 16b | Mechanism of implementing the allocation sequence (eg, central          |
| 11 | concealment    |     | telephone; sequentially numbered, opaque, sealed envelopes),            |
| 12 | mechanism      |     | describing any steps to conceal the sequence until interventions are    |
| 13 |                |     | assigned – N/A                                                          |
| 14 |                |     |                                                                         |
| 15 | Implementation | 16c | Who will generate the allocation sequence, who will enrol participants, |
| 16 |                |     | and who will assign participants to interventions – N/A                 |
| 17 |                |     |                                                                         |
| 18 |                |     |                                                                         |
| 19 | Blinding       | 17a | Who will be blinded after assignment to interventions (eg, trial        |
| 20 | (masking)      |     | participants, care providers, outcome assessors, data analysts), and    |
| 21 |                |     | how N/A                                                                 |
| 22 |                |     |                                                                         |
| 23 |                | 17b | If blinded, circumstances under which unblinding is permissible, and    |
| 24 |                |     | procedure for revealing a participant's allocated intervention during   |
| 25 |                |     | the trial – N/A                                                         |
| 26 |                |     |                                                                         |
| 27 |                |     |                                                                         |

### Methods: Data collection, management, and analysis

|    |                 |     |                                                                          |
|----|-----------------|-----|--------------------------------------------------------------------------|
| 28 |                 |     |                                                                          |
| 29 |                 |     |                                                                          |
| 30 | Data collection | 18a | Plans for assessment and collection of outcome, baseline, and other      |
| 31 | methods         |     | trial data, including any related processes to promote data quality (eg, |
| 32 |                 |     | duplicate measurements, training of assessors) and a description of      |
| 33 |                 |     | study instruments (eg, questionnaires, laboratory tests) along with      |
| 34 |                 |     | their reliability and validity, if known. Reference to where data        |
| 35 |                 |     | collection forms can be found, if not in the protocol – Pages 9-11,      |
| 36 |                 |     | Supplementary file                                                       |
| 37 |                 |     |                                                                          |
| 38 |                 |     |                                                                          |
| 39 |                 | 18b | Plans to promote participant retention and complete follow-up,           |
| 40 |                 |     | including list of any outcome data to be collected for participants who  |
| 41 |                 |     | discontinue or deviate from intervention protocols – Page 12-13          |
| 42 |                 |     | (withdrawals)                                                            |
| 43 |                 |     |                                                                          |
| 44 |                 |     |                                                                          |
| 45 | Data            | 19  | Plans for data entry, coding, security, and storage, including any       |
| 46 | management      |     | related processes to promote data quality (eg, double data entry;        |
| 47 |                 |     | range checks for data values). Reference to where details of data        |
| 48 |                 |     | management procedures can be found, if not in the protocol – Page        |
| 49 |                 |     | 12                                                                       |
| 50 |                 |     |                                                                          |
| 51 |                 |     |                                                                          |
| 52 | Statistical     | 20a | Statistical methods for analysing primary and secondary outcomes.        |
| 53 | methods         |     | Reference to where other details of the statistical analysis plan can be |
| 54 |                 |     | found, if not in the protocol – Page 12-13                               |
| 55 |                 |     |                                                                          |
| 56 |                 | 20b | Methods for any additional analyses (eg, subgroup and adjusted           |
| 57 |                 |     | analyses) – n/A                                                          |
| 58 |                 |     |                                                                          |
| 59 |                 |     |                                                                          |
| 60 |                 |     |                                                                          |



- 1  
2  
3  
4  
5  
6  
7  
8  
9  
10  
11  
12  
13  
14  
15  
16  
17  
18  
19  
20  
21  
22  
23  
24  
25  
26  
27  
28  
29  
30  
31  
32  
33  
34  
35  
36  
37  
38  
39  
40  
41  
42  
43  
44  
45  
46  
47  
48  
49  
50  
51  
52  
53  
54  
55  
56  
57  
58  
59  
60
- 20c Definition of analysis population relating to protocol non-adherence (eg, as randomised analysis), and any statistical methods to handle missing data (eg, multiple imputation) – Page 12

### Methods: Monitoring

- Data monitoring 21a Composition of data monitoring committee (DMC); summary of its role and reporting structure; statement of whether it is independent from the sponsor and competing interests; and reference to where further details about its charter can be found, if not in the protocol. Alternatively, an explanation of why a DMC is not needed – N/A
- 21b Description of any interim analyses and stopping guidelines, including who will have access to these interim results and make the final decision to terminate the trial – N/A
- Harms 22 Plans for collecting, assessing, reporting, and managing solicited and spontaneously reported adverse events and other unintended effects of trial interventions or trial conduct – Page 14
- Auditing 23 Frequency and procedures for auditing trial conduct, if any, and whether the process will be independent from investigators and the sponsor – N/A

### Ethics and dissemination

- Research ethics approval 24 Plans for seeking research ethics committee/institutional review board (REC/IRB) approval – Pages 6 and 14
- Protocol amendments 25 Plans for communicating important protocol modifications (eg, changes to eligibility criteria, outcomes, analyses) to relevant parties (eg, investigators, REC/IRBs, trial participants, trial registries, journals, regulators) – N/A
- Consent or assent 26a Who will obtain informed consent or assent from potential trial participants or authorised surrogates, and how (see Item 32) – Page 7
- 26b Additional consent provisions for collection and use of participant data and biological specimens in ancillary studies, if applicable – N/A
- Confidentiality 27 How personal information about potential and enrolled participants will be collected, shared, and maintained in order to protect confidentiality before, during, and after the trial – Page 12
- Declaration of interests 28 Financial and other competing interests for principal investigators for the overall trial and each study site – Page 22
- Access to data 29 Statement of who will have access to the final trial dataset, and disclosure of contractual agreements that limit such access for investigators – Not present
- Ancillary and post-trial care 30 Provisions, if any, for ancillary and post-trial care, and for compensation to those who suffer harm from trial participation – N/A

|    |               |     |                                                                              |
|----|---------------|-----|------------------------------------------------------------------------------|
| 1  |               |     |                                                                              |
| 2  | Dissemination | 31a | Plans for investigators and sponsor to communicate trial results to          |
| 3  | policy        |     | participants, healthcare professionals, the public, and other relevant       |
| 4  |               |     | groups (eg, via publication, reporting in results databases, or other        |
| 5  |               |     | data sharing arrangements), including any publication restrictions –         |
| 6  |               |     | N/A                                                                          |
| 7  |               |     |                                                                              |
| 8  |               | 31b | Authorship eligibility guidelines and any intended use of professional       |
| 9  |               |     | writers – N/A                                                                |
| 10 |               |     |                                                                              |
| 11 |               | 31c | Plans, if any, for granting public access to the full protocol, participant- |
| 12 |               |     | level dataset, and statistical code – N/A                                    |
| 13 |               |     |                                                                              |
| 14 |               |     |                                                                              |

## Appendices

|    |                  |    |                                                                          |
|----|------------------|----|--------------------------------------------------------------------------|
| 15 |                  |    |                                                                          |
| 16 |                  |    |                                                                          |
| 17 | Informed consent | 32 | Model consent form and other related documentation given to              |
| 18 | materials        |    | participants and authorised surrogates – N/A                             |
| 19 |                  |    |                                                                          |
| 20 | Biological       | 33 | Plans for collection, laboratory evaluation, and storage of biological   |
| 21 | specimens        |    | specimens for genetic or molecular analysis in the current trial and for |
| 22 |                  |    | future use in ancillary studies, if applicable – N/A                     |
| 23 |                  |    |                                                                          |
| 24 |                  |    |                                                                          |

---

\*It is strongly recommended that this checklist be read in conjunction with the SPIRIT 2013 Explanation & Elaboration for important clarification on the items. Amendments to the protocol should be tracked and dated. The SPIRIT checklist is copyrighted by the SPIRIT Group under the Creative Commons "[Attribution-NonCommercial-NoDerivs 3.0 Unported](https://creativecommons.org/licenses/by-nc-nd/3.0/)" license.
